# Supplementary material for: Synthesis of optically active 2-amino-1′-benzyl-2′,5-dioxo-5H-spiro[indeno[1,2-b]pyran-4,3′-indoline]-3-carbonitriles catalyzed by a bifunctional squaramide derived from quinine
Source: Royal Society of Chemistry journal article supplement (doi:10.1039/d0nj06092e), 2021-01-01

## Supporting Information

**Synthesis of optically active 2-amino-1'-benzyl-2',5-dioxo-5H-spiro[indeno[1,2-b]pyran-4,3'-indoline]-3-carbonitriles catalyzed by a bifunctional squaramide derived from quinine**  
Yuanyuan Wang <sup>a</sup>, Zhonglin Wei <sup>a</sup>, Jungang Cao <sup>a</sup>, Dapeng Liang <sup>a</sup>, Yingjie Lin <sup>a\*</sup>, and Haifeng Duan <sup>a\*</sup>

Department of Organic Chemistry, College of Chemistry, Jilin University, 2699 Qianjin Street, Changchun 130012, China.

E-mail: linyj@jlu.edu.cn; duanhf@jlu.edu.cn; Tel: 0431-85168398;

| <b>Table of Contents</b>                                                         | <b>Page</b>    |
|----------------------------------------------------------------------------------|----------------|
| <b>1. General Methods.</b>                                                       | <b>S1</b>      |
| <b>2. Starting Materials.</b>                                                    | <b>S2</b>      |
| <b>3. Characterization Data of Products 2b, 3a-3h and 4a-4s,4o-1.</b>            | <b>S2-S7</b>   |
| <b>4. References</b>                                                             | <b>S7</b>      |
| <b>5. NMR spectra of catalyst, substrate 2b and addition products 4a-4s,4o-1</b> | <b>S8-S40</b>  |
| <b>6. HPLC traces of compounds 4a-4s, 4o-1</b>                                   | <b>S40-S72</b> |

### 1. General Methods.

Unless otherwise stated, all reagents were purchased from commercial suppliers and used without purification. All solvents were obtained from commercial sources and were purified according to standard procedures. TLC was carried out on silica gel plates (HSGF 254), which were visualized with UV light and/or staining with phosphomolybdic acids solution. Purification of reaction products was carried out by column chromatography using silica gel (200-300 mesh). <sup>1</sup>H, <sup>13</sup>C NMR, and <sup>19</sup>F NMR spectra were recorded on a Varian Mercury-300BB (300 MHz) and a Bruker NMR Spectrometer (400 MHz). All chemical shifts (δ) were given in ppm. Chemical shifts are relative to the resonance of the deuterated solvent as the internal standard (CDCl<sub>3</sub>, δ7.26 ppm for proton NMR, δ77.16 ppm for carbon NMR; DMSO, δ2.50 ppm for proton NMR, δ39.52 ppm for carbon NMR). Data are presented as follows: chemical shift, integration, multiplicity (s = singlet, d = double, t = triplet, q = quartet, m = multiplet), and coupling constant in hertz. Mass spectra were recorded on a Bruker Agilent 1290 MicrOTOF-Q II instrument. Melting points were measured on a melting points apparatus and were uncorrected. The enantioselectivity value determination was carried out using chiral HPLC (Waters) instrumentation with a Chiracel OD-H column and IC-3 column. Optical rotations were measured on a Shanghai ShenGuang SGW-2 polarimeter at λ = 589 nm. Optical rotations are reported as follows: [α]<sub>D</sub><sup>25</sup> (c = g/100mL, solvent).

## 2. Starting Materials.

**1a-1q, 1t-1v** were prepared according to literature procedures<sup>(1,2)</sup>; catalysts **3a-3h**<sup>(3-5)</sup> and substrate **2b**<sup>(6)</sup> were prepared according to the reported procedures. Synthesis of racemates based on previous literature report<sup>(7)</sup>.

## 3. Characterization Data of Products **2b, 3a-3h** and **4a-4u,4o-1**.

 **4-fluoro-1H-indene-1,3(2H)-dione (2b)**. White solid, 128.6 mg, 51% yield. <sup>1</sup>H NMR (400 MHz, DMSO) δ 8.06 – 7.88 (m, 1H), 7.80 – 7.65 (m, 2H), 3.37 (s, 2H). HRMS (ESI) calculated for C<sub>9</sub>H<sub>5</sub>FO<sub>2</sub> [M+H]<sup>+</sup>: 165.0307, found 165.0274.

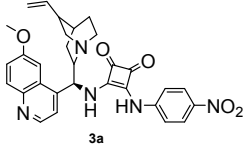 **3-(((1S)-(6-methoxyquinolin-4-yl)(5-vinylquinuclidin-2-yl)methyl)amino)-4-((4-nitrophenyl)amino)cyclobut-3-ene-1,2-dione (3a)**. Yellow solid, 189.0 mg, 78% yield, m. p. = 212-214 °C, [α]<sub>D</sub><sup>25</sup> = 0.1, CHCl<sub>3</sub>. <sup>1</sup>H NMR (400 MHz, DMSO) δ 10.23 (s, 1H), 8.83 (d, J = 9.2 Hz, 1H), 8.42 (s, 1H), 8.29 – 8.09 (m, 2H), 7.99 (d, J = 9.2 Hz, 1H), 7.68 (d, J = 4.6 Hz, 1H), 7.57 (m, 2H), 7.46 (m, 1H), 6.24 – 5.70 (m, 2H), 5.16 – 4.90 (m, 2H), 4.42 (s, 1H), 3.95 (s, 3H), 3.48 (s, 1H), 3.30 – 3.09 (m, 2H), 2.85 – 2.55 (m, 2H), 2.30 (s, 1H), 1.57 (d, J = 29.8 Hz, 4H), 0.68 (s, 1H). HRMS (ESI) calculated for C<sub>30</sub>H<sub>29</sub>N<sub>5</sub>O<sub>5</sub> [M+H]<sup>+</sup>: 540.2202, found 540.5804.

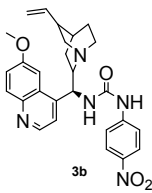 **1-(((1S)-(6-methoxyquinolin-4-yl)(5-vinylquinuclidin-2-yl)methyl)-3-(4-nitrophenyl)urea (3b)**. Yellow solid, 102.8 mg, 82% yield, m. p. = 216-218 °C, [α]<sub>D</sub><sup>25</sup> = -62.8 (c = 0.1, CHCl<sub>3</sub>). <sup>1</sup>H NMR (400 MHz, DMSO) δ 9.67 (s, 1H), 8.73 (d, J = 4.5 Hz, 1H), 8.26 – 8.01 (m, 2H), 7.97 (d, J = 9.2 Hz, 1H), 7.82 – 7.67 (m, 1H), 7.62 – 7.48 (m, 3H), 7.48 – 7.38 (m, 1H), 7.16 (s, 1H), 6.03 – 5.76 (m, 1H), 5.38 (s, 1H), 5.10– 4.84 (m, 2H), 3.95 (s, 3H), 3.51 – 3.32 (m, 2H), 3.27 – 3.19 (m, 1H), 2.76 (d, J = 11.8 Hz, 2H), 2.34 (s, 1H), 1.86 – 1.50 (m, 3H), 1.39 (s, 1H), 1.02 – 0.71 (m, 1H). HRMS (ESI) calculated for C<sub>27</sub>H<sub>29</sub>N<sub>5</sub>O<sub>4</sub> [M+H]<sup>+</sup>: 488.2253, found 488.2257.

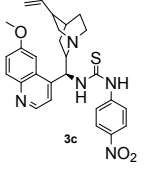 **1-(((1S)-(6-methoxyquinolin-4-yl)(5-vinylquinuclidin-2-yl)methyl)-3-(4-nitrophenyl)thiourea (3c)**. Yellow solid, 135.0 mg, 73% yield, m. p. = 220-222 °C, [α]<sub>D</sub><sup>25</sup> = -54.8 (c = 0.1, CHCl<sub>3</sub>). <sup>1</sup>H NMR (400 MHz, DMSO) δ 10.43 (s, 1H), 9.00 (s, 1H), 8.76 (d, J = 4.2 Hz, 1H), 8.15 (d, J = 9.2 Hz, 2H), 8.00 – 7.77 (m, 4H), 7.61 (d, J = 4.3 Hz, 1H), 7.45 (m, 1H), 6.34 – 5.67 (m, 2H), 5.17 – 4.82 (m, 2H), 3.97 (s, 3H), 3.27 – 3.08 (m, 1H), 2.91 – 2.62 (m, 2H), 2.39 – 2.10 (m, 1H), 1.76 – 1.16 (m, 5H), 0.98 – 0.73 (m, 2H). HRMS (ESI) calculated for C<sub>27</sub>H<sub>29</sub>N<sub>5</sub>O<sub>3</sub>S [M+H]<sup>+</sup>: 504.2025, found 504.2017.

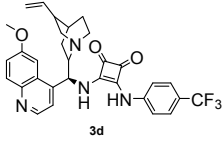 **3-(((1S)-(6-methoxyquinolin-4-yl)(5-vinylquinuclidin-2-yl)methyl)amino)-4-((4-(trifluoromethyl)phenyl)amino)cyclobut-3-ene-1,2-dione (3d)**. White solid, 216.0 mg, 83% yield, m. p. = 211-213 °C, [α]<sub>D</sub><sup>25</sup> = -70.6 (c = 0.1, DMSO). <sup>1</sup>H NMR (400 MHz, DMSO) δ 9.96 (s, 1H), 8.83 (d, J = 4.5 Hz, 1H), 8.32 (s, 1H), 7.99 (d, J = 9.2 Hz, 1H), 7.76 (s, 1H), 7.72 – 7.62 (m, 3H), 7.56 (d, J = 8.4 Hz, 2H), 7.51 – 7.42 (m, 1H), 6.24 – 5.81 (m, 2H), 5.18 – 4.86 (m, 2H), 3.96 (s, 3H), 3.48 (d, J = 7.7 Hz, 1H), 3.32 – 3.12 (m, 2H), 2.90 – 2.57 (m, 2H), 2.29 (s, 1H), 1.56 (d, J = 30.8 Hz, 4H), 0.67 (s, 1H). <sup>19</sup>F NMR (377 MHz, DMSO) δ -60.20. HRMS (ESI) calculated for C<sub>31</sub>H<sub>29</sub>F<sub>3</sub>N<sub>4</sub>O<sub>3</sub> [M+H]<sup>+</sup>: 563.2225, found 563.2214.

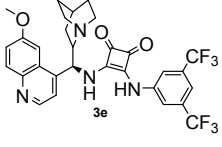 **3-(((3,5-bis(trifluoromethyl)phenyl)amino)-4-(((1S)-(6-methoxyquinolin-4-yl)(5-vinylquinuclidin-2-yl)methyl)amino)cyclobut-3-ene-1,2-dione (3e)**. White solid, 206 mg, 77% yield, m. p. = 225-227 °C, [α]<sub>D</sub><sup>25</sup> = -50.6 (c = 0.1, DMSO). <sup>1</sup>H NMR (400 MHz, DMSO) δ 10.18 (s, 1H), 8.82 (d, J = 4.5 Hz, 1H), 8.32 (s, 1H), 8.08 – 7.86 (m, 3H), 7.75 (s, 1H), 7.70 – 7.59 (m, 2H), 7.46 (m, 1H), 6.22 – 5.87 (m, 2H), 5.02 (m, 2H), 3.95 (s, 3H), 3.48 (d, J = 8.3 Hz, 1H), 3.20 (m, 2H), 2.68 (m,

2H), 2.30 (s, 1H), 1.57 (d, J = 29.8 Hz, 4H), 0.67 (s, 1H). <sup>19</sup>F NMR (377 MHz, DMSO) δ -61.74. HRMS (ESI) calculated for C<sub>32</sub>H<sub>28</sub>F<sub>6</sub>N<sub>4</sub>O<sub>3</sub> [M+H]<sup>+</sup>: 631.2099, found 631.5981.

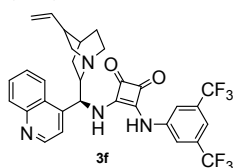

**3-((3,5-bis(trifluoromethyl)phenyl)amino)-4-(((1S)-quinolin-4-yl(5-vinylquinuclidin-2-yl)methyl)amino)cyclobut-3-ene-1,2-dione (3f).** White solid, 236.0 mg, 83% yield, m. p. = 233-235 °C, [α]<sub>D</sub><sup>25</sup> = -89.8 (c = 0.1, DMSO). <sup>1</sup>H NMR (400 MHz, DMSO) δ 10.26 (s, 1H), 8.98 (d, J = 4.5 Hz, 1H), 8.45 (m, 2H), 8.09 (d, J = 8.0 Hz, 1H), 7.98 (s, 2H), 7.82 (m, 1H), 7.78 – 7.68 (m, 2H), 7.66 (s, 1H), 6.22 – 5.73 (m, 2H), 5.19 – 4.83 (m, 2H), 3.53 – 3.37 (m, 1H), 3.20 (m, 2H), 2.83 – 2.59 (m, 2H), 2.29 (s, 1H), 1.55 (d, J = 33.3 Hz, 3H), 1.38 (s, 1H), 0.74 (s, 1H). <sup>19</sup>F NMR (377 MHz, DMSO) δ -61.74. HRMS (ESI) calculated for C<sub>31</sub>H<sub>26</sub>F<sub>6</sub>N<sub>4</sub>O<sub>2</sub> [M+H]<sup>+</sup>: 601.1994, found 601.5799.

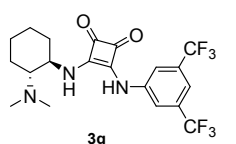

**3-((3,5-bis(trifluoromethyl)phenyl)amino)-4-(((1R,2R)-2-dimethylamino)cyclohexyl)amino)cyclobut-3-ene-1,2-dione (3g).** White solid, 196.0 mg, 52% yield, m. p. = 223-225 °C, [α]<sub>D</sub><sup>25</sup> = +59.8 (c = 0.1, DMSO). <sup>1</sup>H NMR (400 MHz, DMSO) δ 10.47 (s, 1H), 8.08 (s, 2H), 7.94 (s, 1H), 7.66 (s, 1H), 3.89 (s, 1H), 2.25 (s, 6H), 2.10 (d, J = 12.3 Hz, 1H), 1.95 – 1.81 (m, 1H), 1.81 – 1.59 (m, 2H), 1.46 – 1.11 (m, 5H). <sup>19</sup>F NMR (377 MHz, DMSO) δ -61.74. HRMS (ESI) calculated for C<sub>20</sub>H<sub>21</sub>F<sub>6</sub>N<sub>3</sub>O<sub>2</sub> [M+H]<sup>+</sup>: 450.1572, found 450.1580.

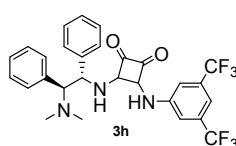

**3-((3,5-bis(trifluoromethyl)phenyl)amino)-4-(((1S,2S)-2-(dimethylamino)-1,2-diphenylethyl)amino)cyclobutane-1,2-dione (3h).** White solid, 256.0 mg, 68% yield, m. p. = 226-228 °C, [α]<sub>D</sub><sup>25</sup> = -52.6 (c = 0.1, DMSO). <sup>1</sup>H NMR (400 MHz, DMSO) δ 10.34 (s, 1H), 8.48 (s, 1H), 8.07 (s, 2H), 7.67 (s, 1H), 7.26 (m, 4H), 7.22 – 7.14 (m, 5H), 7.10 (m, 1H), 5.94 – 5.63 (m, 1H), 4.20 (d, J = 11.3 Hz, 1H), 2.13 (s, 6H). <sup>19</sup>F NMR (377 MHz, DMSO) δ -61.72. HRMS (ESI) calculated for C<sub>28</sub>H<sub>25</sub>F<sub>6</sub>N<sub>3</sub>O<sub>2</sub> [M+H]<sup>+</sup>: 550.1885, found 550.1767.

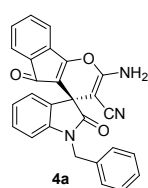

**(R)-2-amino-1'-benzyl-2',5-dioxo-5H-spiro[indeno[1,2-b]pyran-4,3'-indoline]-3-carbonitrile (4a).** Yellow solid, 39.7 mg, 92% yield, after recrystallization (85% yield), m. p. = 173-175 °C, [α]<sub>D</sub><sup>25</sup> = +224.8 (c = 0.1, CHCl<sub>3</sub>). ee = 76% (Chiralpak IC-3, hexane/EtOH = 80:20, 254 nm, 1 mL/min, t<sub>major</sub> = 12.070 min, t<sub>minor</sub> = 20.155 min). <sup>1</sup>H NMR (400 MHz, DMSO) δ 7.79 (s, 2H), 7.58 (m, 1H), 7.52 – 7.15 (m, 10H), 7.03 (m, 1H), 6.86 (d, J = 7.8 Hz, 1H), 5.18 – 4.79 (m, 2H). <sup>13</sup>C NMR (101 MHz, DMSO) δ 189.84, 175.83, 168.60, 161.23, 141.67, 135.85, 135.66, 134.16, 133.74, 131.93, 131.03, 129.61, 129.01, 127.89, 127.80, 127.41, 125.48, 122.82, 119.50, 117.78, 111.37, 106.73, 56.86, 46.73, 43.81. HRMS (ESI) calculated for C<sub>27</sub>H<sub>17</sub>N<sub>3</sub>O<sub>3</sub> [M+H]<sup>+</sup>: 432.1343, found 432.1367. recrystallized 4q

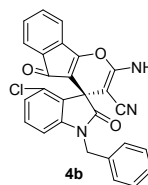

**(R)-2-amino-1'-benzyl-4'-chloro-2',5-dioxo-5H-spiro[indeno[1,2-b]pyran-4,3'-indoline]-3-carbonitrile (4b).** Yellow solid, 41.5 mg, 89% yield, after recrystallization (80% yield), m. p. = 158-160 °C, [α]<sub>D</sub><sup>25</sup> = +186.4 (c = 0.1, CHCl<sub>3</sub>). ee = 61% (Chiralpak IC-3, hexane/EtOH = 80:20, 254 nm, 1 mL/min, t<sub>major</sub> = 9.626 min, t<sub>minor</sub> = 17.856 min). <sup>1</sup>H NMR (400 MHz, DMSO) δ 7.92 (s, 2H), 7.62 (m, 1H), 7.54 – 7.22 (m, 9H), 7.06 (d, J = 8.2 Hz, 1H), 6.90 (d, J = 7.5 Hz, 1H), 5.10 – 4.95 (m, 2H). <sup>13</sup>C NMR (101 MHz, DMSO) δ 189.66, 175.16, 169.02, 161.83, 144.59, 135.80, 135.13, 134.38, 132.19, 131.59, 130.83, 130.58, 129.02, 127.94, 127.45, 126.54, 124.12, 123.05, 119.60, 117.48, 109.24, 105.48, 54.85, 46.92, 43.98. HRMS (ESI) calculated for C<sub>27</sub>H<sub>16</sub>ClN<sub>3</sub>O<sub>3</sub> [M+H]<sup>+</sup>: 466.0953, found 466.4237.

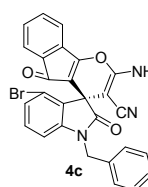

**(R)-2-amino-1'-benzyl-4'-bromo-2',5-dioxo-5H-spiro[indeno[1,2-b]pyran-4,3'-indoline]-3-carbonitrile (4c).** Yellow solid, 44.4 mg, 87% yield, after recrystallization (81% yield), m. p. = 218-220 °C, [α]<sub>D</sub><sup>25</sup> = +179.6 (c = 0.1, CHCl<sub>3</sub>). ee = 60% (Chiralpak IC-3, hexane/EtOH = 80:20, 254 nm, 1 mL/min, t<sub>major</sub> = 10.052 min, t<sub>minor</sub> = 18.735 min). <sup>1</sup>H NMR (400 MHz, DMSO) δ 7.93 (s, 2H), 7.60 (m, 1H), 7.54 – 7.14 (m, 10H), 7.02 – 6.86 (m, 1H), 5.76 (s, 1H), 5.20 – 4.84 (m, 2H). <sup>13</sup>C NMR (101 MHz, DMSO) δ 189.62, 175.19, 169.18, 161.91, 144.80, 135.78, 135.16, 134.38, 132.20, 131.76, 130.83, 129.02, 127.95, 127.93, 127.43, 127.16, 123.04, 119.60, 119.46, 117.48, 109.67, 105.39, 54.85, 48.12, 43.89. HRMS (ESI) calculated for C<sub>27</sub>H<sub>16</sub>BrN<sub>3</sub>O<sub>3</sub> [M+H]<sup>+</sup>: 510.0448, found 510.3886.

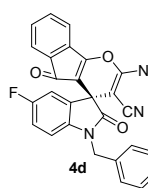

**(R)-2-amino-1'-benzyl-5'-fluoro-2',5-dioxo-5H-spiro[indeno[1,2-b]pyran-4,3'-indoline]-3-carbonitrile (4d).** Yellow solid, 40.9 mg, 91% yield, after recrystallization (85% yield), m. p. = 148-150 °C, [α]<sub>D</sub><sup>25</sup> = +214.4 (c = 0.1, CHCl<sub>3</sub>). ee = 78% (Chiralpak IC-3, hexane/EtOH = 80:20, 254 nm, 1 mL/min, t<sub>major</sub> = 10.201 min, t<sub>minor</sub> = 17.233 min). <sup>1</sup>H NMR (400 MHz, DMSO) δ 7.89 (s, 2H), 7.61 (m, 1H), 7.54 – 7.20 (m, 9H), 7.19 – 7.03 (m, 1H), 6.88 (m, 1H), 5.16 – 4.87 (m, 2H). <sup>13</sup>C NMR (101 MHz, DMSO) δ 189.82, 176.01, 168.51, 161.21, 158.30, 138.98, 135.98, 135.61, 134.14, 133.56 (d, J = 8.0 Hz),

131.92, 131.01, 129.00, 127.87, 127.44, 122.81, 119.48, 117.79, 116.04 (d, J = 23.6 Hz), 113.19 (d, J = 25.2 Hz), 110.82 (d, J = 8.0 Hz), 106.90, 57.03, 46.95, 43.86. <sup>19</sup>F NMR (377 MHz, DMSO) δ -120.02. HRMS (ESI) calculated for C<sub>27</sub>H<sub>16</sub>FN<sub>3</sub>O<sub>3</sub> [M+H]<sup>+</sup>: 450.1248, found 510.3886.

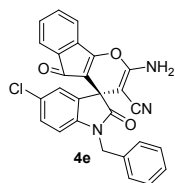

**(R)-2-amino-1'-benzyl-5'-chloro-2',5-dioxo-5H-spiro[indeno[1,2-b]pyran-4,3'-indoline]-3-carbonitrile (4e).** Yellow solid, 41.9 mg, 90% yield, after recrystallization (84% yield), m. p. = 155-158 °C, [α]<sub>D</sub><sup>25</sup> = +246.8 (c = 0.1, CHCl<sub>3</sub>). ee = 76% (Chiralpak IC-3, hexane/EtOH = 80:20, 254 nm, 1 mL/min, t<sub>major</sub> = 8.566 min, t<sub>minor</sub> = 14.477 min). <sup>1</sup>H NMR (400 MHz, DMSO) δ 7.86 (s, 2H), 7.68 – 7.53 (m, 2H), 7.52 – 7.20 (m, 9H), 6.88 (d, J = 8.4 Hz, 1H), 5.12 – 4.90 (m, 2H). <sup>13</sup>C NMR (101 MHz, DMSO) δ 189.84, 175.83, 168.60, 161.23, 141.67, 135.85, 135.66, 134.16, 133.74, 131.93, 131.03, 129.61, 129.01, 127.89, 127.80, 127.41, 125.48, 122.82, 119.50, 117.78, 111.37, 106.73, 56.86, 46.73, 43.81. HRMS (ESI) calculated for C<sub>27</sub>H<sub>16</sub>ClN<sub>3</sub>O<sub>3</sub> [M+H]<sup>+</sup>: 466.0953, found 466.0971.

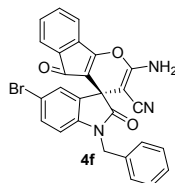

**(R)-2-amino-1'-benzyl-5'-bromo-2',5-dioxo-5H-spiro[indeno[1,2-b]pyran-4,3'-indoline]-3-carbonitrile (4f).** Yellow solid, 46.9 mg, 92% yield, after recrystallization (82% yield), m. p. = 169-171 °C, [α]<sub>D</sub><sup>25</sup> = +273.6 (c = 0.1, CHCl<sub>3</sub>). ee = 73% (Chiralpak IC-3, hexane/EtOH = 80:20, 254 nm, 1 mL/min, t<sub>major</sub> = 8.853 min, t<sub>minor</sub> = 15.038 min). <sup>1</sup>H NMR (400 MHz, DMSO) δ 7.86 (s, 2H), 7.69 (d, J = 2.0 Hz, 1H), 7.63 – 7.55 (m, 1H), 7.53 – 7.20 (m, 9H), 6.83 (d, J = 8.4 Hz, 1H), 5.10 – 4.90 (m, 2H). <sup>13</sup>C NMR (101 MHz, DMSO) δ 189.86, 175.71, 168.62, 161.22, 142.08, 135.82, 135.68, 134.17, 134.06, 132.46, 131.93, 131.03, 129.01, 128.17, 127.89, 127.40, 122.82, 119.51, 117.80, 115.55, 111.88, 106.71, 56.85, 46.66, 43.77. HRMS (ESI) calculated for C<sub>27</sub>H<sub>16</sub>BrN<sub>3</sub>O<sub>3</sub> [M+H]<sup>+</sup>: 510.0448, found 510.3676.

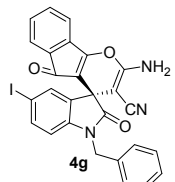

**(R)-2-amino-1'-benzyl-5'-iodo-2',5-dioxo-5H-spiro[indeno[1,2-b]pyran-4,3'-indoline]-3-carbonitrile (4g).** Yellow solid, 51.3 mg, 92% yield, after recrystallization (84% yield), m. p. = 163-165 °C, [α]<sub>D</sub><sup>25</sup> = +278.0 (c = 0.1, CHCl<sub>3</sub>). ee = 77% (Chiralpak IC-3, hexane/EtOH = 80:20, 254 nm, 1 mL/min, t<sub>major</sub> = 9.572 min, t<sub>minor</sub> = 16.746 min). <sup>1</sup>H NMR (400 MHz, DMSO) δ 7.85 (s, 2H), 7.79 (d, J = 1.6 Hz, 1H), 7.59 (m, 2H), 7.54 – 7.22 (m, 8H), 6.71 (d, J = 8.3 Hz, 1H), 5.16 – 4.82 (m, 2H). <sup>13</sup>C NMR (101 MHz, DMSO) δ 189.86, 175.51, 168.57, 161.18, 142.56, 138.23, 135.81, 135.69, 134.17, 134.14, 133.46, 131.89, 131.02, 128.98, 127.86, 127.36, 122.79, 119.48, 117.81, 112.32, 106.75, 86.92, 56.91, 46.45, 43.70. HRMS (ESI) calculated for C<sub>27</sub>H<sub>16</sub>IN<sub>3</sub>O<sub>3</sub> [M+H]<sup>+</sup>: 558.0309, found 558.3913.

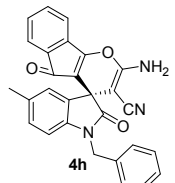

**(R)-2-amino-1'-benzyl-5'-methyl-2',5-dioxo-5H-spiro[indeno[1,2-b]pyran-4,3'-indoline]-3-carbonitrile (4h).** Yellow solid, 41.9 mg, 94% yield, after recrystallization (85% yield), m. p. = 181-183 °C, [α]<sub>D</sub><sup>25</sup> = +272.4 (c = 0.1, CHCl<sub>3</sub>). ee = 72% (Chiralpak IC-3, hexane/EtOH = 80:20, 254 nm, 1 mL/min, t<sub>major</sub> = 11.776 min, t<sub>minor</sub> = 21.937 min). <sup>1</sup>H NMR (400 MHz, DMSO) δ 7.76 (s, 2H), 7.66 – 7.52 (m, 1H), 7.51 – 7.21 (m, 8H), 7.16 (s, 1H), 7.03 (d, J = 7.3 Hz, 1H), 6.72 (d, J = 8.0 Hz, 1H), 5.11 – 4.83 (m, 2H), 2.21 (s, 3H). <sup>13</sup>C NMR (101 MHz, DMSO) δ 189.83, 175.88, 168.16, 161.03, 140.40, 136.26, 135.59, 134.18, 132.72, 131.85, 131.82, 130.97, 129.90, 128.92, 127.74, 127.41, 125.52, 122.78, 119.38, 117.87, 109.68, 107.56, 57.67, 46.62, 43.74, 20.98. HRMS (ESI) calculated for C<sub>28</sub>H<sub>19</sub>N<sub>3</sub>O<sub>3</sub> [M+H]<sup>+</sup>: 446.1499, found 446.1886.

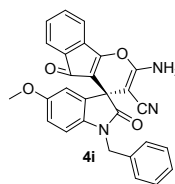

**(R)-2-amino-1'-benzyl-5'-methoxy-2',5-dioxo-5H-spiro[indeno[1,2-b]pyran-4,3'-indoline]-3-carbonitrile (4i).** Yellow solid, 42.5 mg, 92% yield, after recrystallization (83% yield), m. p. = 156-158 °C, [α]<sub>D</sub><sup>25</sup> = +249.6 (c = 0.1, CHCl<sub>3</sub>). ee = 72% (Chiralpak IC-3, hexane/EtOH = 80:20, 254 nm, 1 mL/min, t<sub>major</sub> = 11.776 min, t<sub>minor</sub> = 21.937 min). <sup>1</sup>H NMR (400 MHz, DMSO) δ 7.78 (s, 2H), 7.67 – 7.54 (m, 1H), 7.53 – 7.16 (m, 8H), 7.05 (d, J = 2.5 Hz, 1H), 6.78 (m, 2H), 5.16 – 4.80 (m, 2H), 3.67 (s, 3H). <sup>13</sup>C NMR (101 MHz, DMSO) δ 189.84, 175.77, 168.28, 161.06, 156.53, 136.28, 136.05, 135.68, 134.11, 133.05, 131.84, 131.05, 128.93, 127.74, 127.42, 122.74, 119.36, 117.90, 114.28, 112.02, 110.39, 107.44, 57.64, 55.99, 46.99, 43.78. HRMS (ESI) calculated for C<sub>28</sub>H<sub>19</sub>N<sub>3</sub>O<sub>4</sub> [M+H]<sup>+</sup>: 462.1448, found 462.4724.

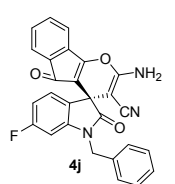

**(R)-2-amino-1'-benzyl-6'-fluoro-2',5-dioxo-5H-spiro[indeno[1,2-b]pyran-4,3'-indoline]-3-carbonitrile (4j).** Yellow solid, 41.8 mg, 93% yield, after recrystallization (86% yield), m. p. = 145-147 °C, [α]<sub>D</sub><sup>25</sup> = +136.8 (c = 0.1, CHCl<sub>3</sub>). ee = 79% (Chiralpak IC-3, hexane/EtOH = 80:20, 254 nm, 1 mL/min, t<sub>major</sub> = 8.735 min, t<sub>minor</sub> = 13.176 min). <sup>1</sup>H NMR (400 MHz, DMSO) δ 7.82 (s, 2H), 7.59 (m, 1H), 7.52 – 7.22 (m, 9H), 7.02 – 6.67 (m, 2H), 5.00 (s, 2H). <sup>13</sup>C NMR (101 MHz, DMSO) δ 189.80, 176.46, 168.33, 161.12, 144.55 (d, J = 12.4 Hz), 135.90, 135.55, 134.20, 131.94, 130.94, 128.99, 127.91, 127.52, 126.69 (d, J = 12.0 Hz), 122.82, 119.47, 117.74, 109.71, 109.59 (d, J = 22.5 Hz), 107.08, 98.70,

98.56 (d,  $J = 27.9$  Hz), 57.16, 46.22, 43.81.  $^{19}\text{F}$  NMR (377 MHz, DMSO)  $\delta$  -111.07. HRMS (ESI) calculated for  $\text{C}_{27}\text{H}_{16}\text{FN}_3\text{O}_3$   $[\text{M}+\text{H}]^+$ : 450.1248, found 450.4484.

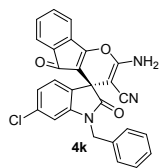

**(R)-2-amino-1'-benzyl-6'-chloro-2',5-dioxo-5H-spiro[indeno[1,2-b]pyran-4,3'-indoline]-3-carbonitrile (4k).** Yellow solid, 44.3 mg, 95% yield, after recrystallization (85% yield), m. p. = 178-180 °C,  $[\alpha]_{\text{D}}^{25} = +168.0$  ( $c = 0.1$ ,  $\text{CHCl}_3$ ). ee = 75% (Chiralpak IC-3, hexane/EtOH = 80:20, 254 nm, 1 mL/min,  $t_{\text{major}} = 8.617$  min,  $t_{\text{minor}} = 13.442$  min).  $^1\text{H}$  NMR (400 MHz, DMSO)  $\delta$  7.86 (s, 2H), 7.50 – 7.43 (m, 2H), 7.43 – 7.34 (m, 5H), 7.34 – 7.25 (m, 3H), 7.09 (m, 1H), 7.01 (d,  $J = 1.8$  Hz, 1H), 5.02 (s, 2H).  $^{13}\text{C}$  NMR (101 MHz, DMSO)  $\delta$  189.79, 176.14, 168.45, 161.18, 144.27, 135.85, 135.52, 134.22, 134.10, 131.98, 130.94, 130.52, 129.02, 127.93, 127.45, 126.66, 123.33, 122.85, 119.52, 117.72, 110.24, 106.85, 56.85, 46.31, 43.72. HRMS (ESI) calculated for  $\text{C}_{27}\text{H}_{16}\text{ClN}_3\text{O}_3$   $[\text{M}+\text{H}]^+$ : 466.0953, found 466.0964.

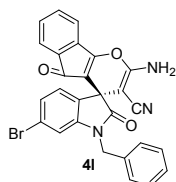

**(R)-2-amino-1'-benzyl-6'-bromo-2',5-dioxo-5H-spiro[indeno[1,2-b]pyran-4,3'-indoline]-3-carbonitrile (4l).** Yellow solid, 47.0 mg, 92% yield, after recrystallization (80% yield), m. p. = 155-157 °C,  $[\alpha]_{\text{D}}^{25} = +281.2$  ( $c = 0.1$ ,  $\text{CHCl}_3$ ). ee = 71% (Chiralpak IC-3, hexane/EtOH = 80:20, 254 nm, 1 mL/min,  $t_{\text{major}} = 8.754$  min,  $t_{\text{minor}} = 13.796$  min).  $^1\text{H}$  NMR (400 MHz, DMSO)  $\delta$  7.87 (s, 2H), 7.68 – 7.53 (m, 1H), 7.54 – 7.17 (m, 10H), 7.14 (d,  $J = 1.6$  Hz, 1H), 5.20 – 4.86 (m, 2H).  $^{13}\text{C}$  NMR (101 MHz, DMSO)  $\delta$  189.79, 176.77, 168.46, 161.14, 138.66, 137.73, 135.47, 134.85, 134.26, 132.03, 132.00, 130.90, 128.88, 127.41, 126.30, 125.13, 124.54, 122.91, 119.60, 117.78, 114.66, 106.87, 57.07, 46.46, 45.38. HRMS (ESI) calculated for  $\text{C}_{27}\text{H}_{16}\text{BrN}_3\text{O}_3$   $[\text{M}+\text{H}]^+$ : 510.0448, found 510.3895.

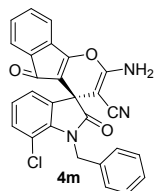

**(R)-2-amino-1'-benzyl-7'-chloro-2',5-dioxo-5H-spiro[indeno[1,2-b]pyran-4,3'-indoline]-3-carbonitrile (4m).** Yellow solid, 43.8 mg, 94% yield, after recrystallization (81% yield), m. p. = 150-152 °C,  $[\alpha]_{\text{D}}^{25} = +166.8$  ( $c = 0.1$ ,  $\text{CHCl}_3$ ). ee = 71% (Chiralpak IC-3, hexane/EtOH = 80:20, 254 nm, 1 mL/min,  $t_{\text{major}} = 8.478$  min,  $t_{\text{minor}} = 18.664$  min).  $^1\text{H}$  NMR (400 MHz, DMSO)  $\delta$  7.91 (s, 2H), 7.59 (m, 1H), 7.55 – 7.16 (m, 10H), 7.09 (m, 1H), 5.49 – 5.06 (m, 2H).  $^{13}\text{C}$  NMR (101 MHz, DMSO)  $\delta$  189.84, 175.83, 168.60, 161.23, 141.67, 135.85, 135.66, 134.16, 133.74, 131.93, 131.03, 129.61, 129.01, 127.89, 127.80, 127.41, 125.48, 122.82, 119.50, 117.78, 111.37, 106.73, 56.86, 46.73, 43.81. HRMS (ESI) calculated for  $\text{C}_{27}\text{H}_{16}\text{ClN}_3\text{O}_3$   $[\text{M}+\text{H}]^+$ : 466.0953, found 466.4251.

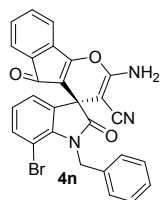

**(R)-2-amino-1'-benzyl-7'-bromo-2',5-dioxo-5H-spiro[indeno[1,2-b]pyran-4,3'-indoline]-3-carbonitrile (4n).** Yellow solid, 48.0 mg, 94% yield, after recrystallization (79% yield), m. p. = 221-223 °C,  $[\alpha]_{\text{D}}^{25} = +212.4$  ( $c = 0.1$ ,  $\text{CHCl}_3$ ). ee = 65% (Chiralpak IC-3, hexane/EtOH = 80:20, 254 nm, 1 mL/min,  $t_{\text{major}} = 8.559$  min,  $t_{\text{minor}} = 20.833$  min).  $^1\text{H}$  NMR (400 MHz, DMSO)  $\delta$  7.90 (s, 2H), 7.65 – 7.54 (m, 1H), 7.52 – 7.18 (m, 10H), 7.02 (m, 1H), 5.33 (d,  $J = 16.9$  Hz, 2H).  $^{13}\text{C}$  NMR (101 MHz, DMSO)  $\delta$  189.78, 176.94, 168.46, 161.14, 140.11, 137.67, 135.47, 135.38, 135.17, 134.27, 132.04, 130.89, 128.85, 127.35, 126.31, 125.51, 125.05, 122.91, 119.60, 117.78, 106.90, 102.05, 57.12, 46.40, 45.10. HRMS (ESI) calculated for  $\text{C}_{27}\text{H}_{16}\text{BrN}_3\text{O}_3$   $[\text{M}+\text{H}]^+$ : 510.0448, found 510.3890.

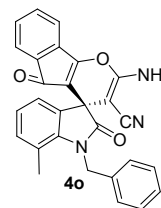

**(R)-2-amino-1'-benzyl-7'-methyl-2',5-dioxo-5H-spiro[indeno[1,2-b]pyran-4,3'-indoline]-3-carbonitrile (4o).** Yellow solid, 42.3 mg, 95% yield, after recrystallization (87% yield), m. p. = 223-225 °C,  $[\alpha]_{\text{D}}^{25} = +207.6$  ( $c = 0.1$ ,  $\text{CHCl}_3$ ). ee = 82% (Chiralpak IC-3, hexane/EtOH = 80:20, 254 nm, 1 mL/min,  $t_{\text{major}} = 11.415$  min,  $t_{\text{minor}} = 31.109$  min).  $^1\text{H}$  NMR (400 MHz, DMSO)  $\delta$  7.79 (s, 2H), 7.57 (m, 1H), 7.51 – 7.14 (m, 9H), 6.98 (m, 2H), 5.39 – 5.07 (m, 2H), 2.21 (s, 3H).  $^{13}\text{C}$  NMR (101 MHz, DMSO)  $\delta$  189.88, 176.99, 168.18, 160.99, 140.78, 138.22, 135.56, 134.18, 133.51, 132.63, 131.88, 130.94, 129.11, 127.49, 126.04, 123.67, 123.17, 122.78, 119.97, 119.41, 117.99, 107.66, 57.96, 46.11, 45.34, 18.38. HRMS (ESI) calculated for  $\text{C}_{28}\text{H}_{19}\text{N}_3\text{O}_3$   $[\text{M}+\text{H}]^+$ : 446.1499, found 446.4718.

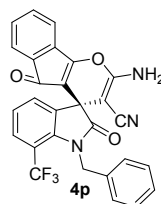

**(R)-2-amino-1'-benzyl-2',5-dioxo-7'-(trifluoromethyl)-5H-spiro[indeno[1,2-b]pyran-4,3'-indoline]-3-carbonitrile (4p).** Yellow solid, 45.9 mg, 92% yield, after recrystallization (78% yield), m. p. = 221-223 °C,  $[\alpha]_{\text{D}}^{25} = +158.6$  ( $c = 0.1$ ,  $\text{CHCl}_3$ ). ee = 64% (Chiralpak OD-H, hexane/EtOH = 90:10, 254 nm, 1 mL/min,  $t_{\text{major}} = 12.293$  min,  $t_{\text{minor}} = 20.889$  min).  $^1\text{H}$  NMR (300 MHz, dmsO)  $\delta$  7.97 (s, 2H), 7.86 – 7.75 (m, 1H), 7.74 – 7.64 (m, 1H), 7.65 – 7.55 (m, 1H), 7.53 – 7.38 (m, 2H), 7.38 – 7.15 (m, 7H), 5.15 (s, 2H).  $^{13}\text{C}$  NMR (101 MHz, DMSO)  $\delta$  189.74, 177.53, 168.70, 161.31, 140.78, 136.41, 135.44, 134.74, 134.30, 132.09, 130.87, 130.12, 128.65, 127.82 (q,  $J = 11.1, 5.5$  Hz), 127.14, 125.69, 123.89, 122.94, 119.67, 117.72, 111.80, 111.47, 106.59, 56.72, 46.11, 45.27.  $^{19}\text{F}$  NMR (377 MHz, DMSO)  $\delta$  -53.50. HRMS (ESI) calculated for  $\text{C}_{28}\text{H}_{16}\text{F}_3\text{N}_3\text{O}_3$   $[\text{M}+\text{H}]^+$ : 500.1177, found 500.1802.

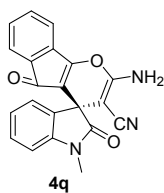

**(R)-2-amino-1'-methyl-2',5-dioxo-5H-spiro[indeno[1,2-b]pyran-4,3'-indoline]-3-carbonitrile (4q).** Yellow solid, 33.1 mg, 93% yield, after recrystallization (86% yield), m. p. = 209-211 °C,  $[\alpha]_D^{25} = +78.4$  (c = 0.1, CHCl<sub>3</sub>). ee = 80% (Chiralpak IC-3, hexane/EtOH = 80:20, 254 nm, 1 mL/min, t<sub>major</sub> = 24.583 min, t<sub>minor</sub> = 33.464 min). <sup>1</sup>H NMR (400 MHz, DMSO) δ 7.74 (s, 2H), 7.57 (m, 1H), 7.49 – 7.22 (m, 5H), 7.15 – 7.00 (m, 2H), 3.21 (s, 3H). <sup>13</sup>C NMR (101 MHz, DMSO) δ 189.69, 175.68, 168.02, 161.08, 143.75, 135.55, 134.15, 131.84, 131.66, 130.93, 129.80, 124.77, 123.46, 122.67, 119.35, 117.68, 109.23, 107.55, 57.26, 46.50, 27.03. HRMS (ESI) calculated for C<sub>21</sub>H<sub>13</sub>N<sub>3</sub>O<sub>3</sub> [M+H]<sup>+</sup>: 356.1030, found 356.3911.

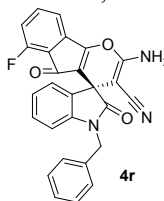

**(R)-2-amino-1'-benzyl-6-fluoro-2',5-dioxo-5H-spiro[indeno[1,2-b]pyran-4,3'-indoline]-3-carbonitrile (4r).** Yellow solid, 17.5 mg, 39% yield, m. p. = 155-157 °C,  $[\alpha]_D^{25} = +176.2$  (c = 0.1, CHCl<sub>3</sub>). ee = 35% (Chiralpak IC-3, hexane/EtOH = 80:20, 254 nm, 1 mL/min, t<sub>major</sub> = 13.069 min, t<sub>minor</sub> = 21.281 min). <sup>1</sup>H NMR (400 MHz, DMSO) δ 7.80 (s, 2H), 7.58 – 7.40 (m, 4H), 7.40 – 7.15 (m, 6H), 7.11 – 6.93 (m, 1H), 6.86 (d, J = 7.8 Hz, 1H), 5.18 – 4.81 (m, 2H). <sup>13</sup>C NMR (101 MHz, DMSO) δ 188.63, 175.87, 166.90, 160.94, 155.73, 153.18, 142.75, 136.18, 135.03 (d, J = 6.7 Hz), 133.20, 131.63, 129.75, 128.96, 127.80, 127.43, 125.14, 123.54 (d, J = 11.6 Hz), 120.38 (d, J = 12.8 Hz), 119.41, 117.69, 109.90, 107.78, 57.2, 46.47, 43.74. <sup>19</sup>F NMR (377 MHz, DMSO) δ -117.86. HRMS (ESI) calculated for C<sub>27</sub>H<sub>16</sub>FN<sub>3</sub>O<sub>3</sub> [M+H]<sup>+</sup>: 450.1209, found 450.1174.

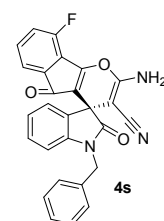

**(R)-2-amino-1'-benzyl-9-fluoro-2',5-dioxo-5H-spiro[indeno[1,2-b]pyran-4,3'-indoline]-3-carbonitrile (4s).** Yellow solid, 22.5 mg, 50% yield, m. p. = 145-147 °C,  $[\alpha]_D^{25} = +184.4$  (c = 0.1, CHCl<sub>3</sub>). ee = 38% (Chiralpak IC-3, hexane/EtOH = 80:20, 254 nm, 1 mL/min, t<sub>major</sub> = 12.423 min, t<sub>minor</sub> = 20.031 min). <sup>1</sup>H NMR (400 MHz, DMSO) δ 7.82 (s, 2H), 7.74 – 7.54 (m, 1H), 7.43 (d, J = 7.3 Hz, 2H), 7.38 – 7.12 (m, 7H), 7.09 – 6.96 (m, 1H), 6.86 (d, J = 7.8 Hz, 1H), 4.99 (s, 2H). <sup>13</sup>C NMR (101 MHz, DMSO) δ 186.21, 175.82, 166.96, 160.97, 157.95, 155.35, 142.76, 137.59 (d, J = 18.9, 6.3 Hz), 136.17, 131.50, 129.77, 128.96, 127.81, 127.43, 125.11, 123.60, 121.28 (d, J = 21.3 Hz), 117.72, 116.29, 115.36 (d, J = 14.0 Hz), 109.93, 107.99, 57.40, 46.59, 43.75. <sup>19</sup>F NMR (377 MHz, DMSO) δ -114.24. HRMS (ESI) calculated for C<sub>27</sub>H<sub>16</sub>FN<sub>3</sub>O<sub>3</sub> [M+H]<sup>+</sup>: 450.1209, found 450.2005.

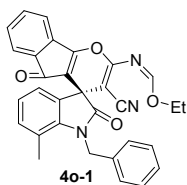

**Ethyl (R, Z)-N-(1'-benzyl-3-cyano-7'-methyl-2',5-dioxo-5H-spiro[indeno[1,2-b]pyran-4,3'-indolin]-2-yl)formimidate (4o-1).** Compound **4o** (1.0 eq, 44.6 mg) was put into a round bottom flask, added triethoxymethane (1.5 eq, 22.5 mg) and 0.5 mL AcOH, heated and stirred at 120 °C for about 4 hours. After the reaction was complete, the solvent was evaporated in vacuo, Separation and purification of compound **4o-1** by column chromatography. Yellow solid, 49.1 mg, 98% yield, m. p. = 209-211 °C,  $[\alpha]_D^{25} = +198.2$  (c = 0.1, CHCl<sub>3</sub>), ee = 95% (Chiralpak IC-3, hexane/EtOH = 80:20, 254 nm, 1 mL/min, t<sub>major</sub> = 14.755 min, t<sub>minor</sub> = 22.287 min). <sup>1</sup>H NMR (300 MHz, CDCl<sub>3</sub>) δ 8.51 (s, 1H), 7.51 – 7.18 (m, 9H), 7.18 – 6.81 (m, 3H), 5.31 (q, J = 17.1 Hz, 2H), 4.44 (q, J = 7.1 Hz, 2H), 2.28 (s, 3H), 1.40 (t, J = 7.1 Hz, 3H). <sup>13</sup>C NMR (101 MHz, CDCl<sub>3</sub>) δ 189.26, 175.57, 167.90, 160.43, 158.92, 140.83, 137.09, 135.56, 134.14, 133.00, 131.27, 131.10, 130.92, 128.96, 127.19, 125.84, 123.63, 122.65, 122.60, 120.60, 118.96, 114.95, 107.37, 83.03, 64.99, 47.66, 46.08, 18.67, 13.88. HRMS (ESI) calculated for C<sub>31</sub>H<sub>23</sub>N<sub>3</sub>O<sub>4</sub> [M+H]<sup>+</sup>: 502.1722, found 502.1809.

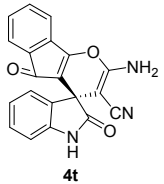

**(R)-2-amino-2',5-dioxo-5H-spiro[indeno[1,2-b]pyran-4,3'-indoline]-3-carbonitrile (4t).** Yellow solid, 32.0 mg, 94% yield, after recrystallization (84% yield), m. p. = 178-180 °C,  $[\alpha]_D^{25} = +198.6$  (c = 0.1, CHCl<sub>3</sub>). ee = 66% (Chiralpak IC-3, hexane/*i*-PrOH = 90:10, 254 nm, 1 mL/min, t<sub>major</sub> = 26.254 min, t<sub>minor</sub> = 38.945 min). <sup>1</sup>H NMR (400 MHz, DMSO) δ 10.69 (s, 1H), 7.71 (s, 2H), 7.57 (t, J = 7.4 Hz, 1H), 7.44 (t, J = 7.4 Hz, 1H), 7.37 (d, J = 7.1 Hz, 1H), 7.31 (d, J = 7.2 Hz, 1H), 7.24 (t, J = 7.6 Hz, 2H), 6.97 (t, J = 7.5 Hz, 1H), 6.89 (d, J = 7.6 Hz, 1H). <sup>13</sup>C NMR (101 MHz, DMSO) δ 189.82, 177.31, 167.96, 160.93, 142.30, 135.58, 134.11, 132.49, 131.78, 130.96, 129.62, 125.06, 122.73, 122.66, 119.27, 117.82, 110.22, 107.71, 57.68, 46.86.

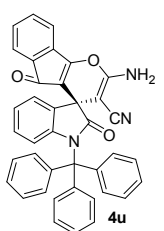

**(R)-2-amino-2',5-dioxo-1'-trityl-5H-spiro[indeno[1,2-b]pyran-4,3'-indoline]-3-carbonitrile (4u).** Yellow solid, 59.9 mg, 96% yield, after recrystallization (82% yield), m. p. = 165-167 °C,  $[\alpha]_D^{25} = +242.4$  (c = 0.1, CHCl<sub>3</sub>). ee = 63% (Chiralpak IC-3, hexane/EtOH = 90:10, 254 nm, 1 mL/min, t<sub>major</sub> = 20.150 min, t<sub>minor</sub> = 45.032 min). <sup>1</sup>H NMR (400 MHz, DMSO) δ 7.76 (s, 2H), 7.60 – 7.53 (m, 1H), 7.53 – 7.41 (m, 8H), 7.35 – 7.17 (m, 11H), 7.01 – 6.85 (m, 2H), 6.31 – 6.19 (m, 1H). <sup>13</sup>C NMR (101 MHz, DMSO) δ 189.93, 176.87, 168.14, 161.06, 143.20, 142.23, 135.56, 134.15, 131.98, 131.90, 130.93,

129.57, 128.06, 127.23, 124.65, 123.10, 122.90, 119.37, 118.19, 115.99, 107.71, 74.73, 58.00, 47.32.

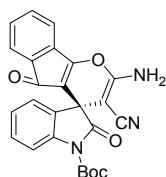

**tert-butyl (R)-2-amino-3-cyano-2',5-dioxo-5H-spiro[indeno[1,2-b]pyran-4,3'-indoline]-1'-carboxylate.** Yellow solid, 22.9 mg, 52% yield, m. p. = 179-181 °C,  $[\alpha]_{\text{D}}^{25} = +166.2$  (c = 0.1, CHCl<sub>3</sub>). ee = 14% (Chiralpak IA, hexane/EtOH = 95:5, 254 nm, 1 mL/min, t<sub>major</sub> = 32.394 min, t<sub>minor</sub> = 35.553 min). <sup>1</sup>H NMR (400 MHz, DMSO) δ 7.93 (s, 2H), 7.80 (d, J = 8.2 Hz, 1H), 7.59 (t, J = 7.2 Hz, 1H), 7.51 – 7.31 (m, 5H), 7.21 (t, J = 7.4 Hz, 1H), 1.59 (s, 9H). <sup>13</sup>C NMR (101 MHz, DMSO) δ 189.75, 174.65, 168.12, 161.03, 148.74, 139.26, 135.38, 134.28, 132.08, 130.77, 130.35, 130.08, 125.69, 125.41, 122.88, 119.68, 117.61, 114.96, 107.15, 84.98, 57.33, 47.34, 28.07.

#### 4. References

1. Li J, Wang N, Li C, Jia X. Multicomponent Reaction to Construct Spirocyclic Oxindoles with a Michael (Triple Michael)/Cyclization Cascade Sequence as the Key Step. *Chem. Eur. J.*, **2012**;18(31):9645-50.
2. Li T-Z, Xie J, Jiang Y, Sha F, Wu X-Y. Enantioselective Vinylogous Michael/Cyclization Cascade Reaction of Acyclic β,γ-Unsaturated Amides with Isatylidene Malononitriles: Asymmetric Construction of Spirocyclic Oxindoles. *Adv. Synth. Catal.*, **2015**;357(16-17):3507-11.
3. Zhao B-L, Du D-M. Catalytic asymmetric conjugate addition of various α-mercaptoketones to α,β-unsaturated N-acylated oxazolidin-2-ones with bifunctional organocatalyst. *RSC Adv.*, **2014**;4(52):27346-53.
4. Qian Y, Ma G, Lv A, Zhu H-L, Zhao J, Rawal VH. Squaramide-catalyzed enantioselective Friedel-Crafts reaction of indoles with imines. *Chem. Comm.*, **2010**;46(17):3004-6.
5. Yang W, Du D-M. Chiral Squaramide-Catalyzed Highly Enantioselective Michael Addition of 2-Hydroxy-1,4-naphthoquinones to Nitroalkenes. *Adv. Synth. Catal.*, **2011**;353(8):1241-6.
6. Marvi O, Giah M. Montmorillonite KSF Clay as Novel and Recyclable Heterogeneous Catalyst for the Microwave Mediated Synthesis of Indan-1,3-Diones. *Bull. Korean Chem. Soc.*, **2009**;30(12):2918-20.
7. Maher F, El-Zohry YAE, Thanaa A, Mohamed, and Essam, Hussein M. Synthesis and reactions of some new spire {indeno[1,2-b]p yran-4,3'-indolines}. *Heterocycles.*, **2008**;75(4):955-63.

## 5. NMR spectra of catalyst, substrate 2b and addition products 4a-4u,4o-1

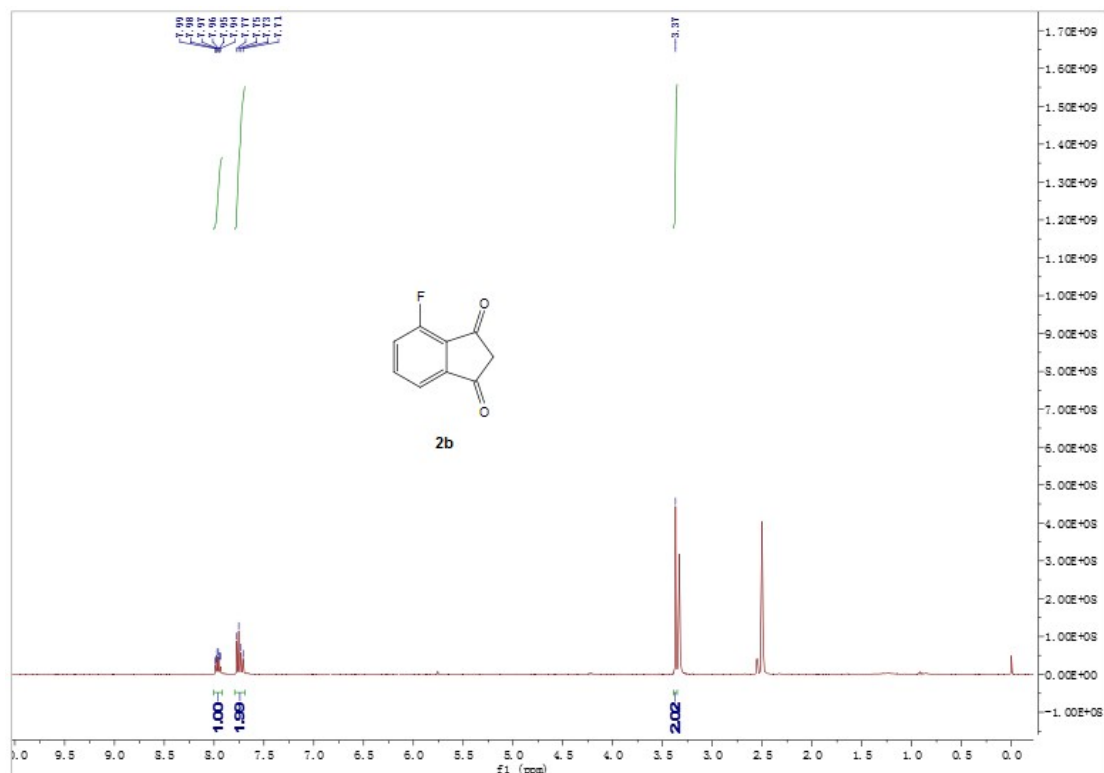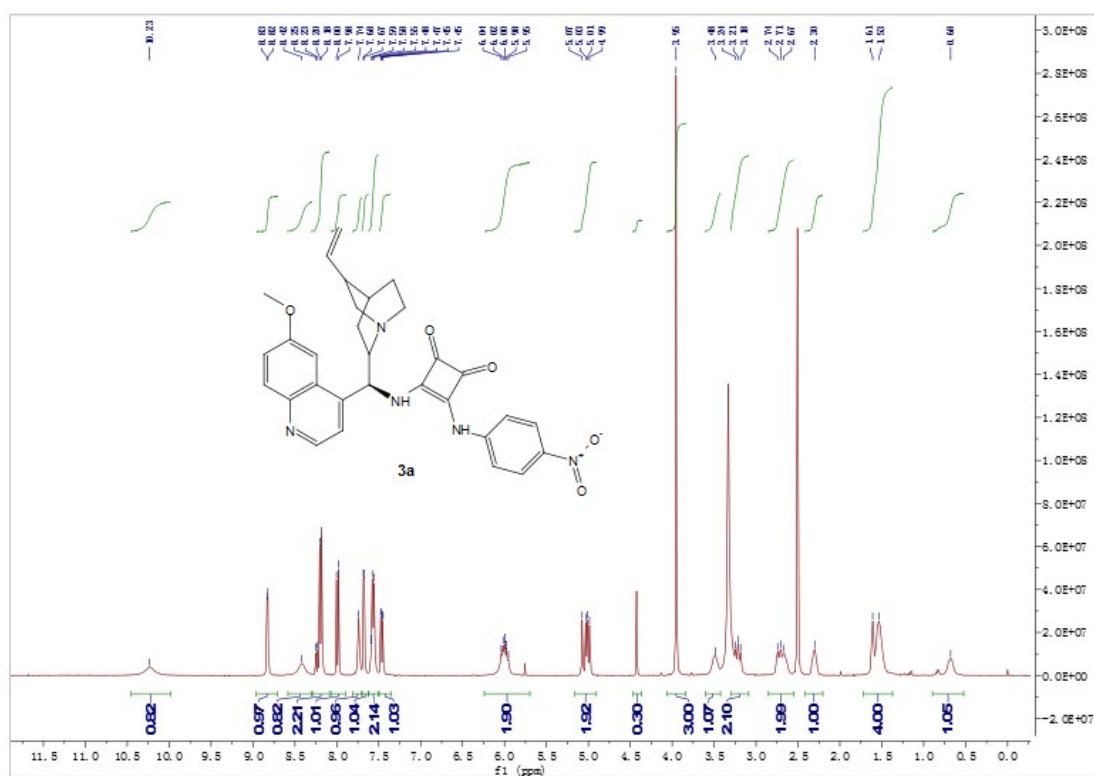



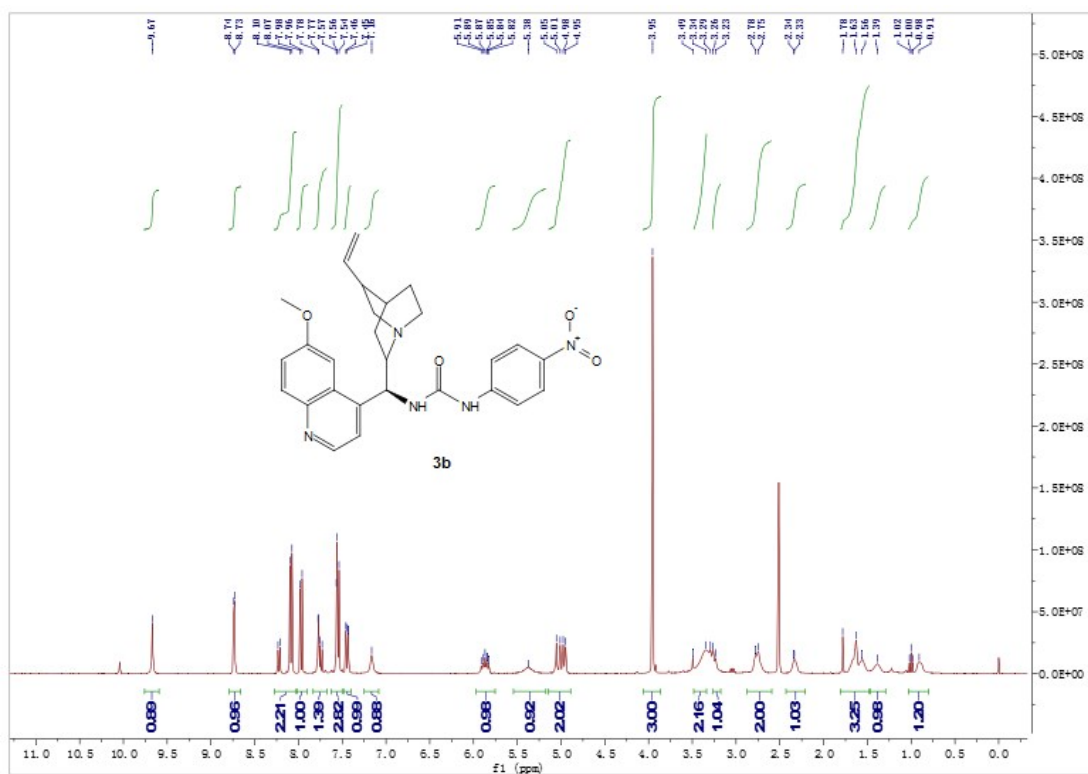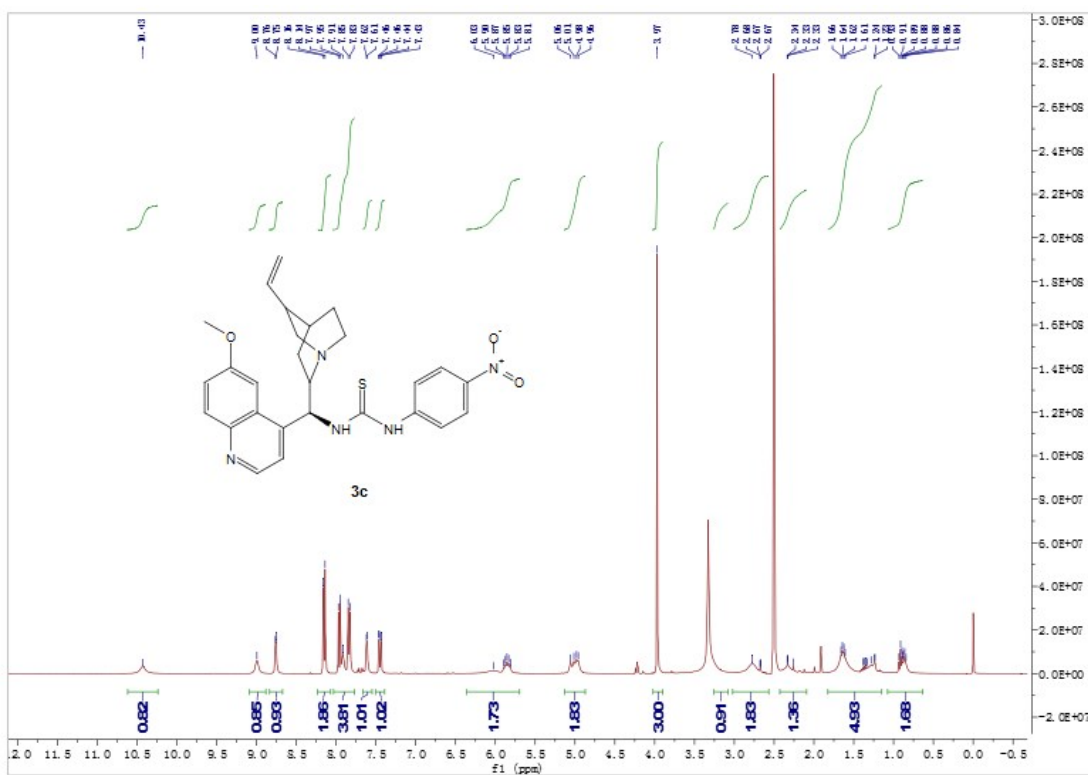

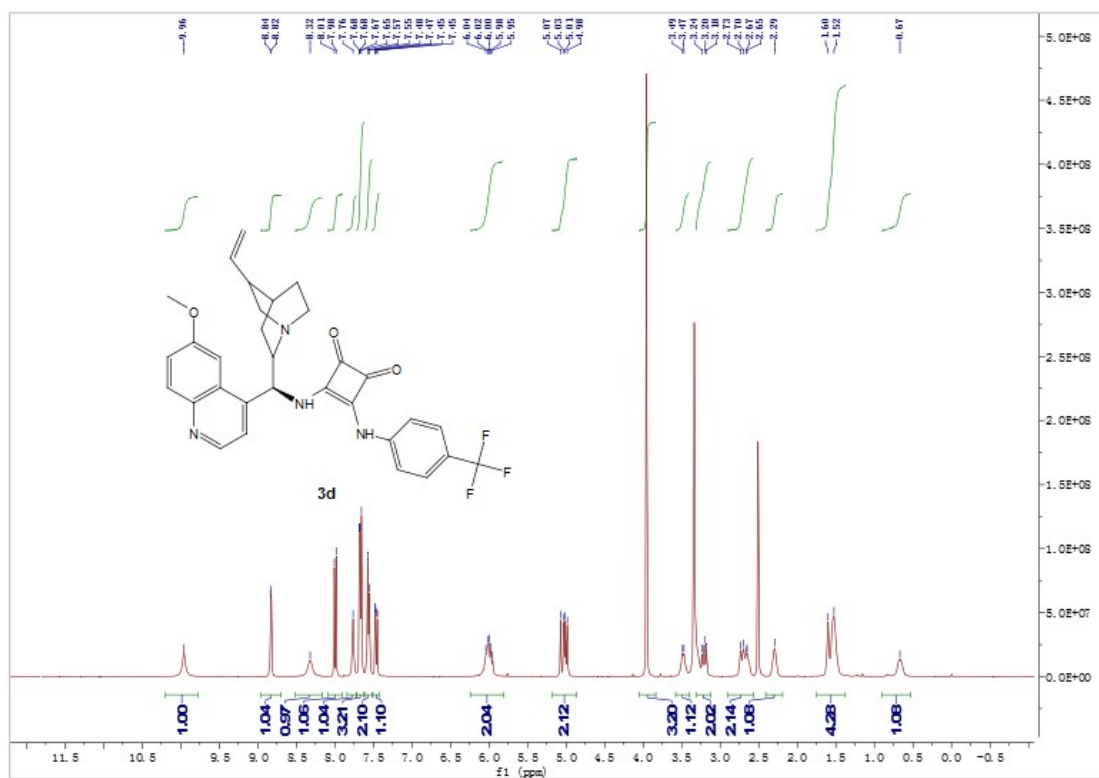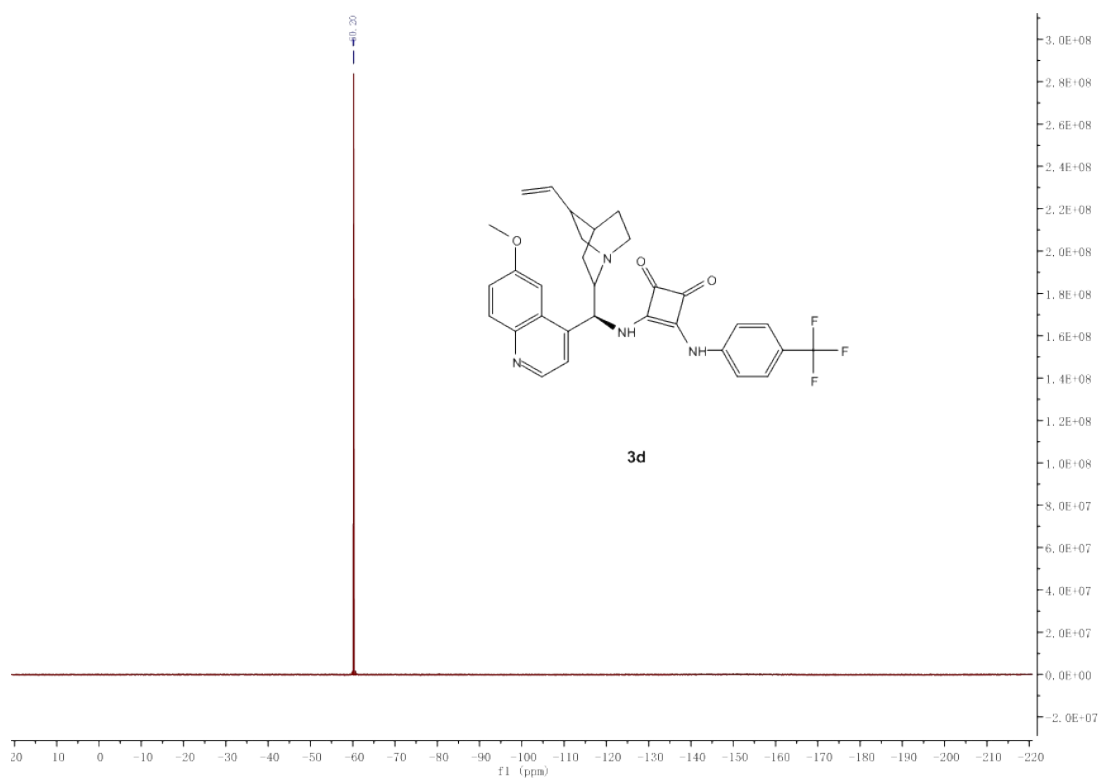

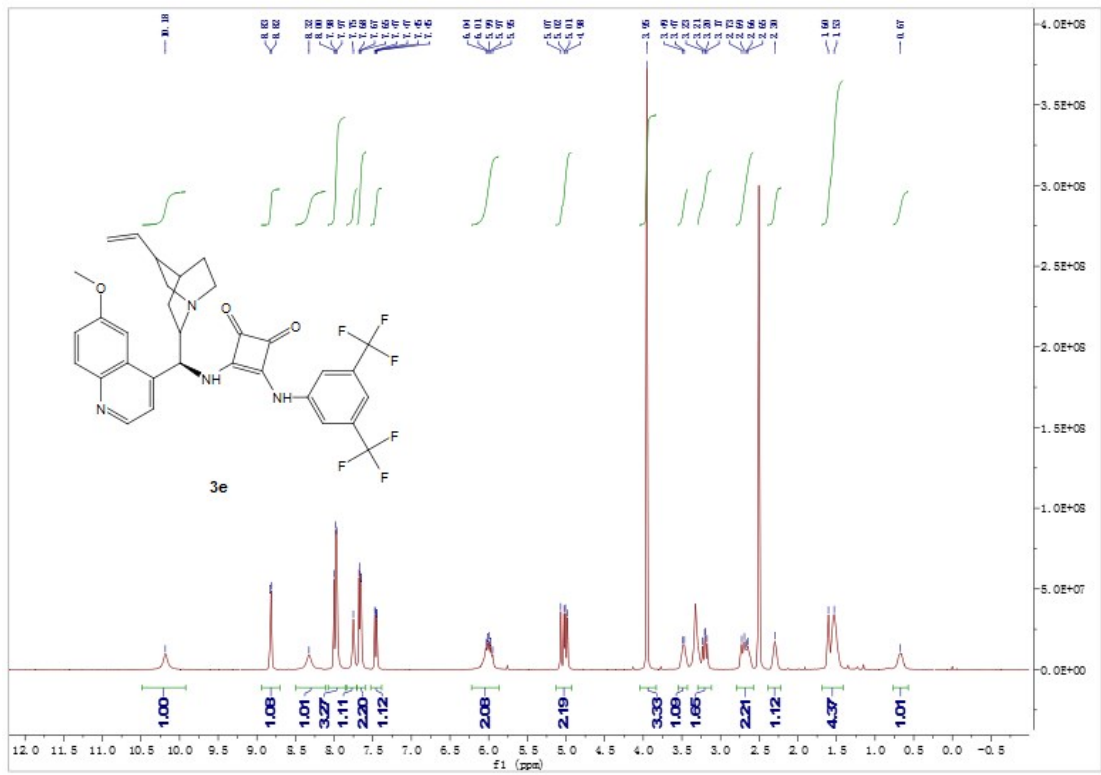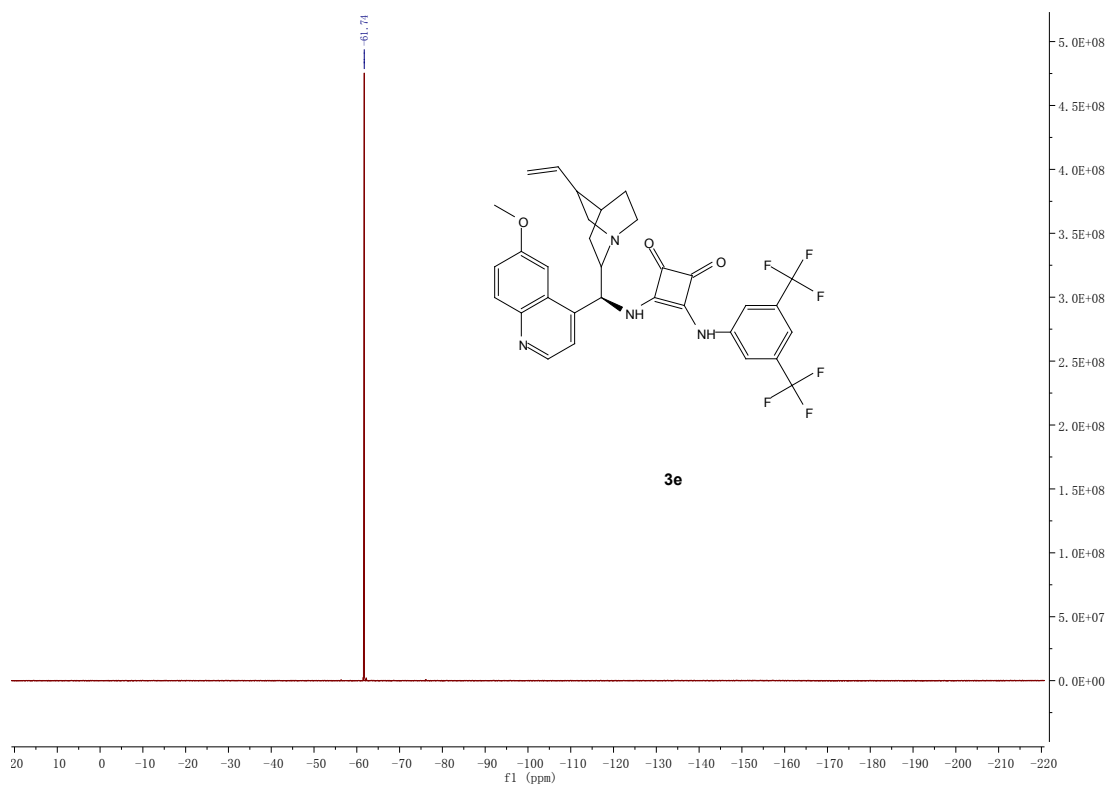

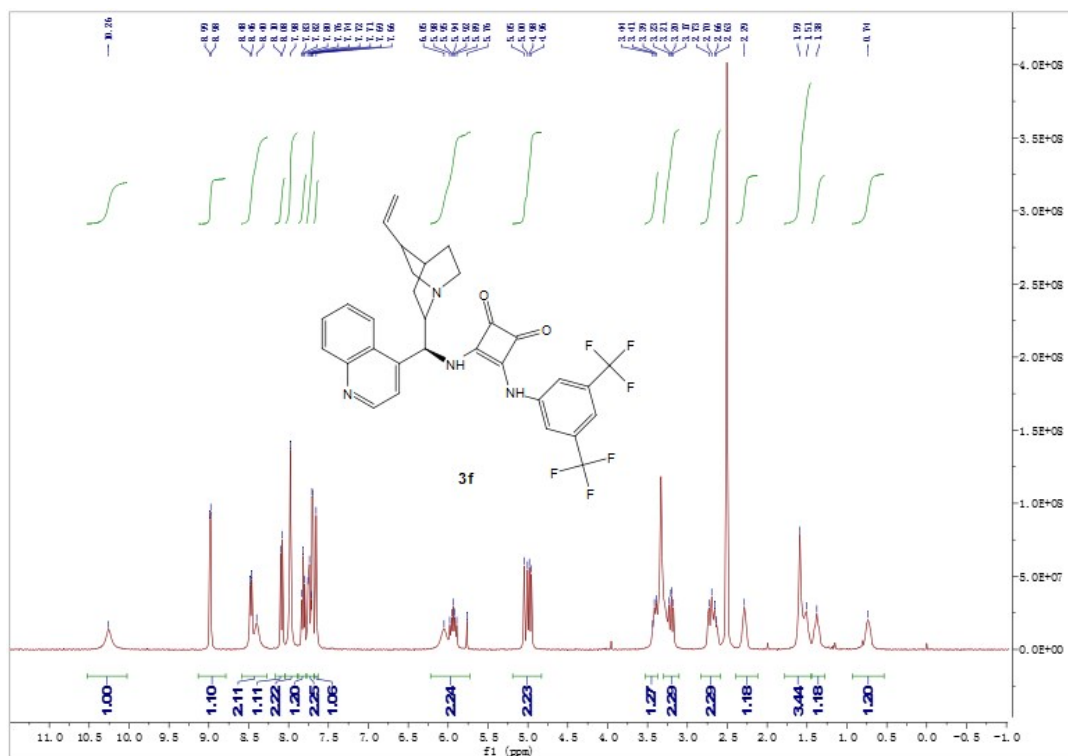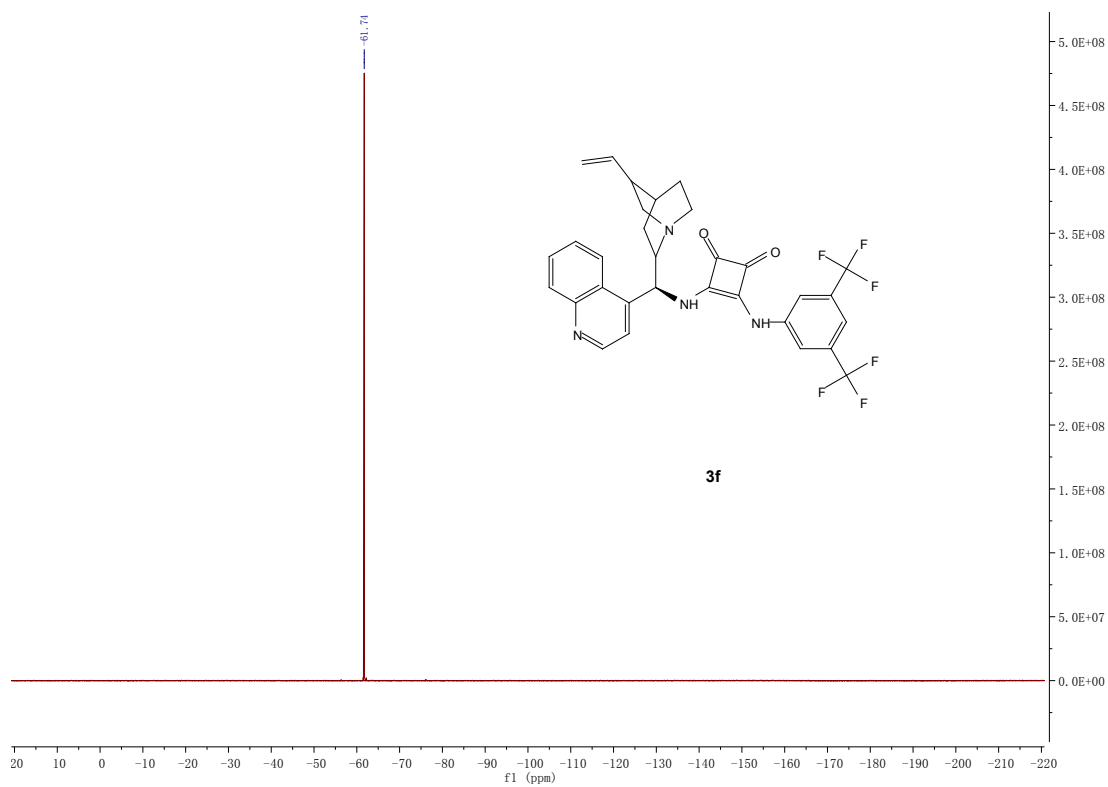

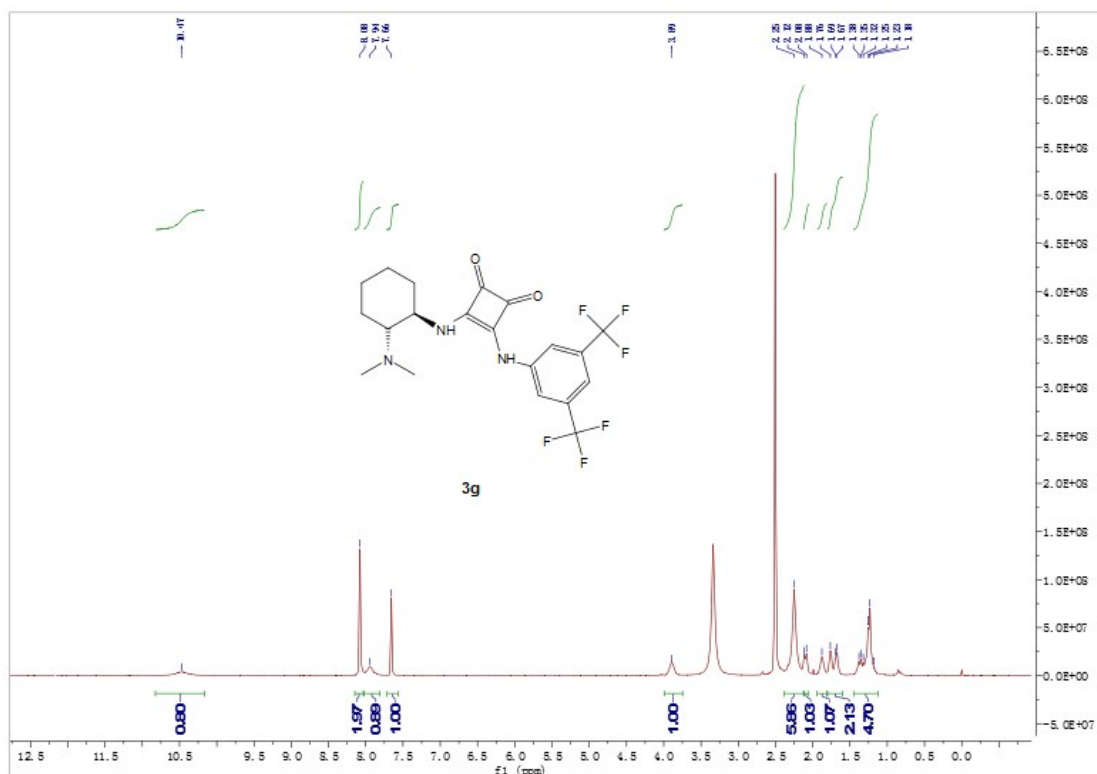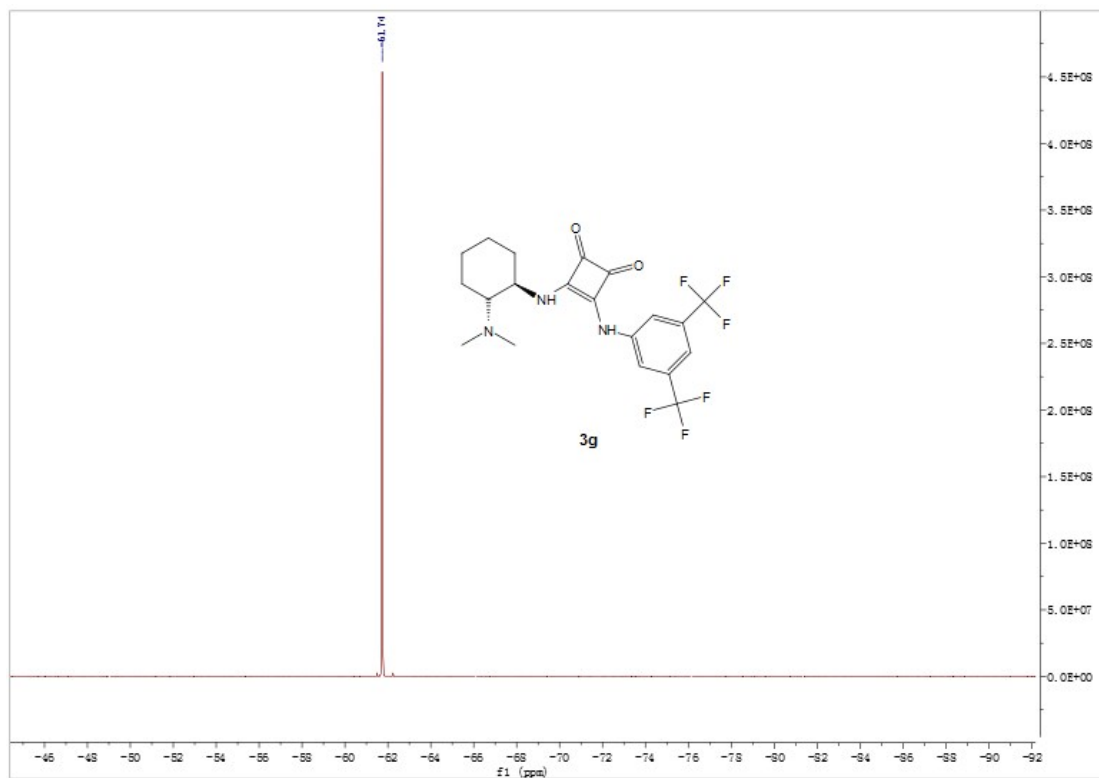

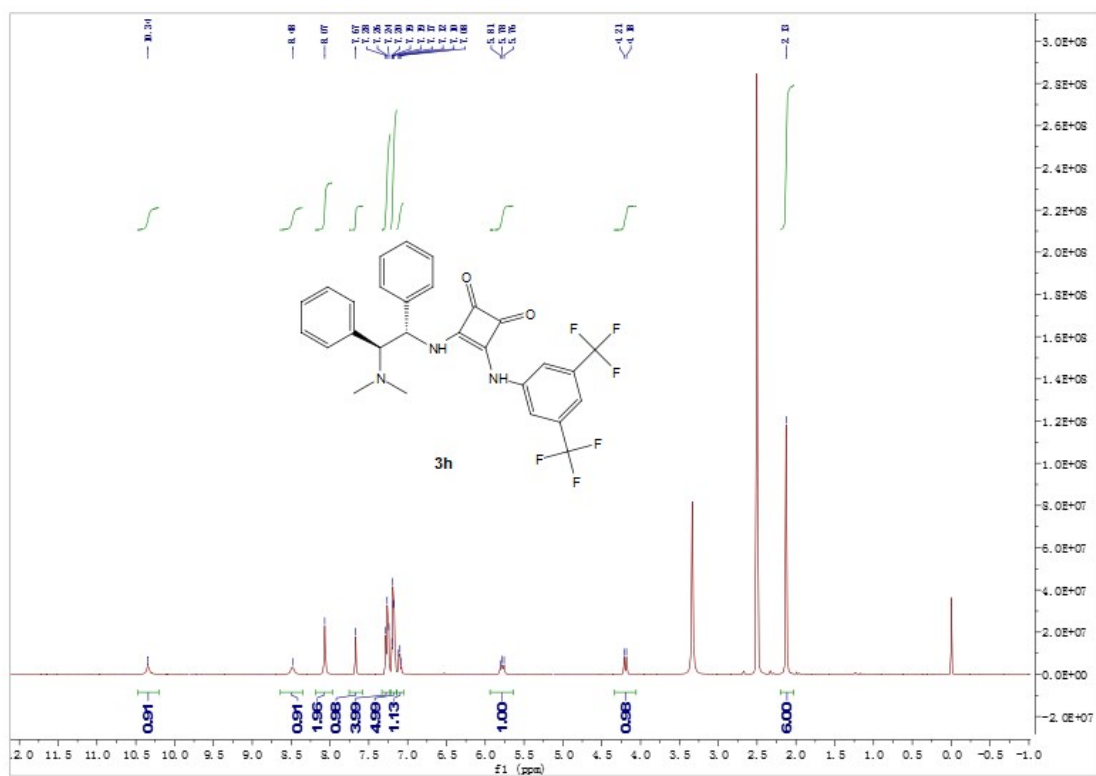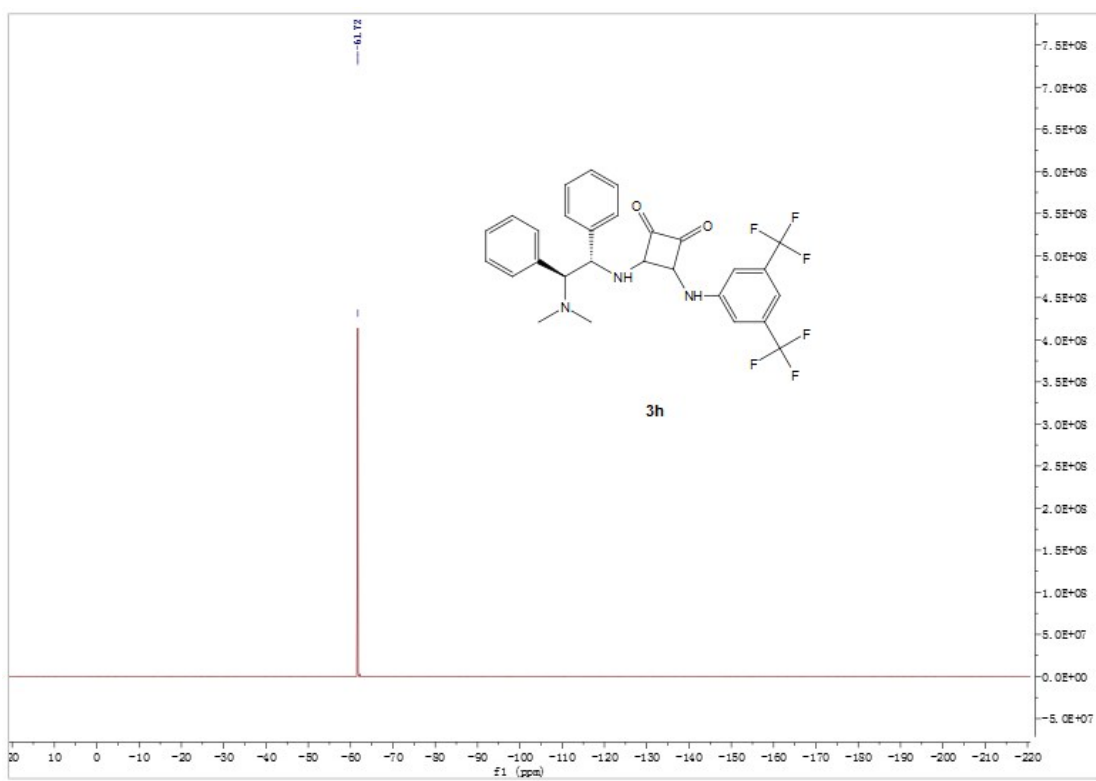

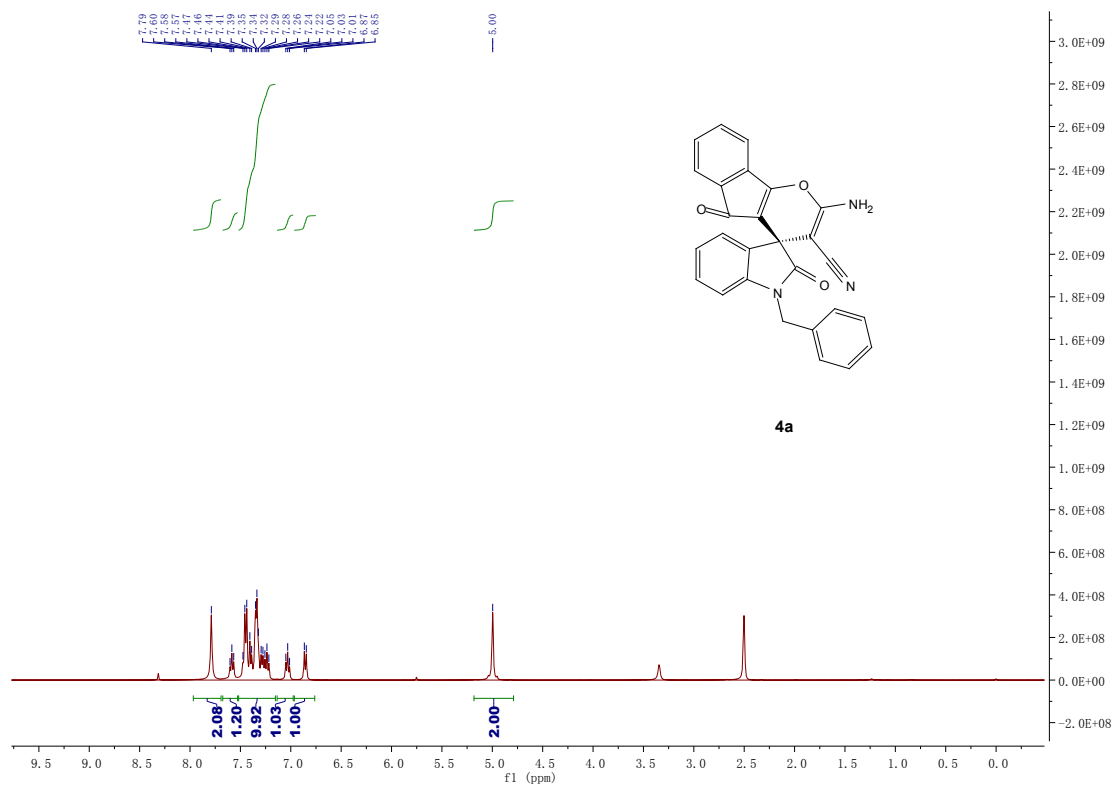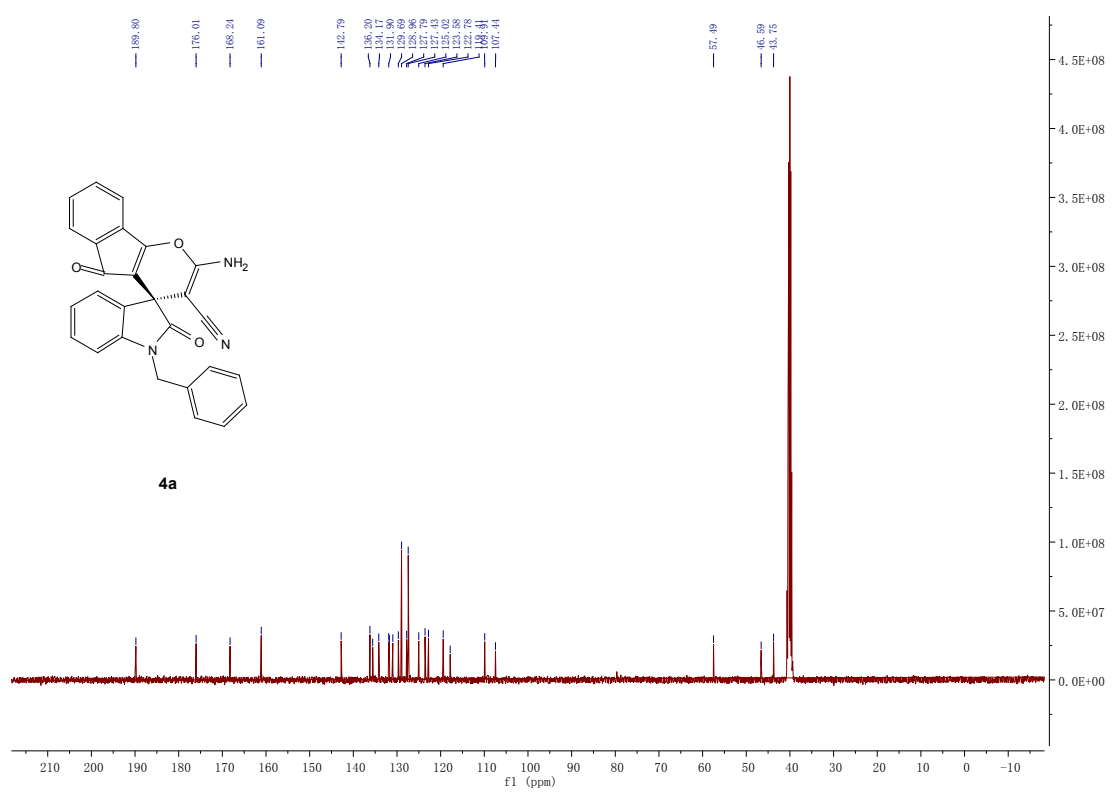

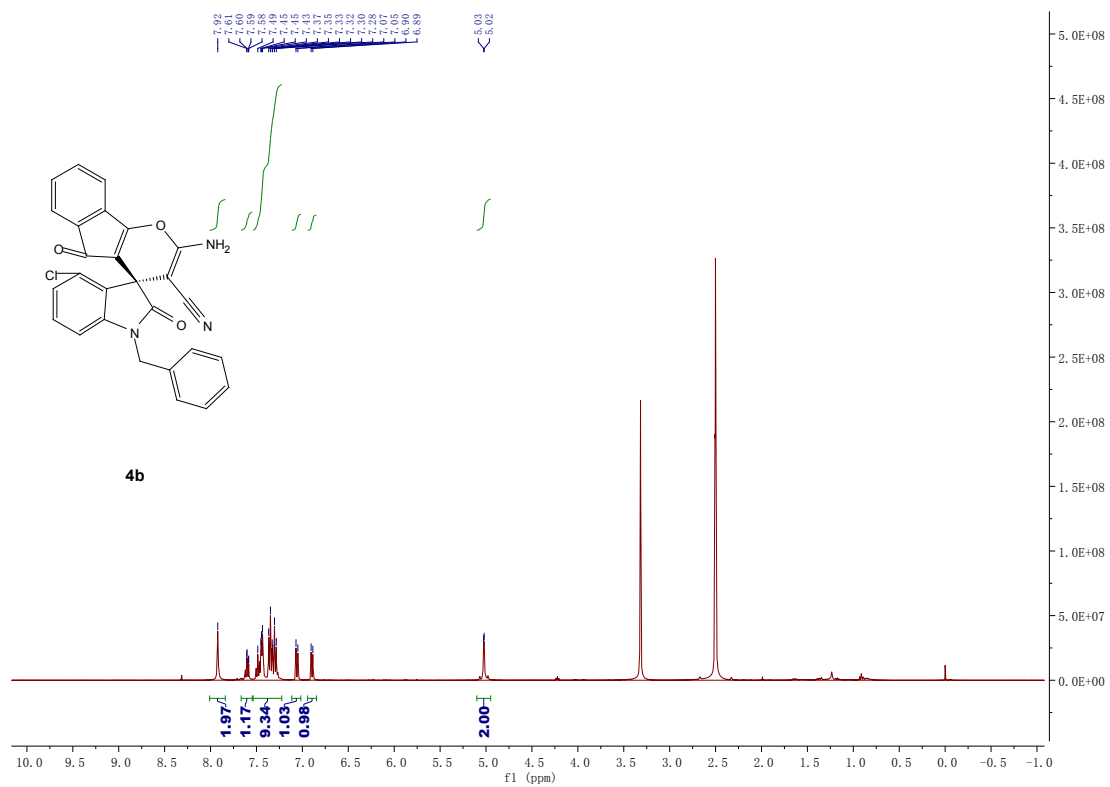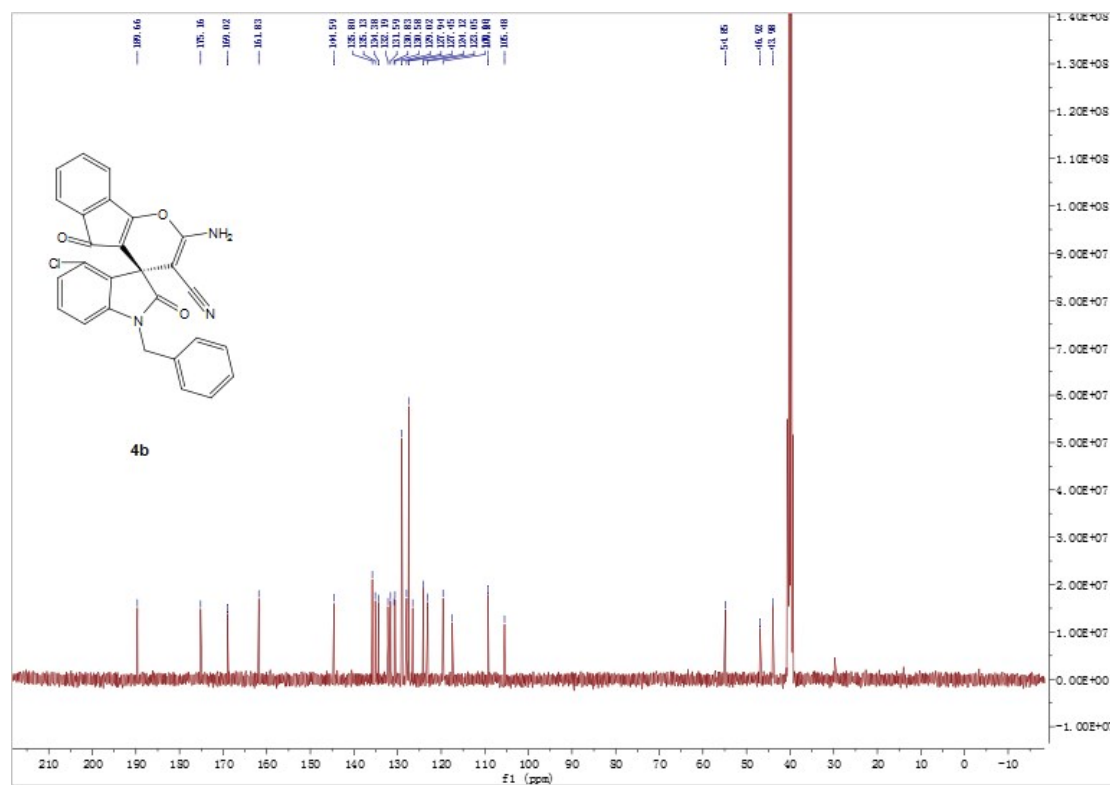



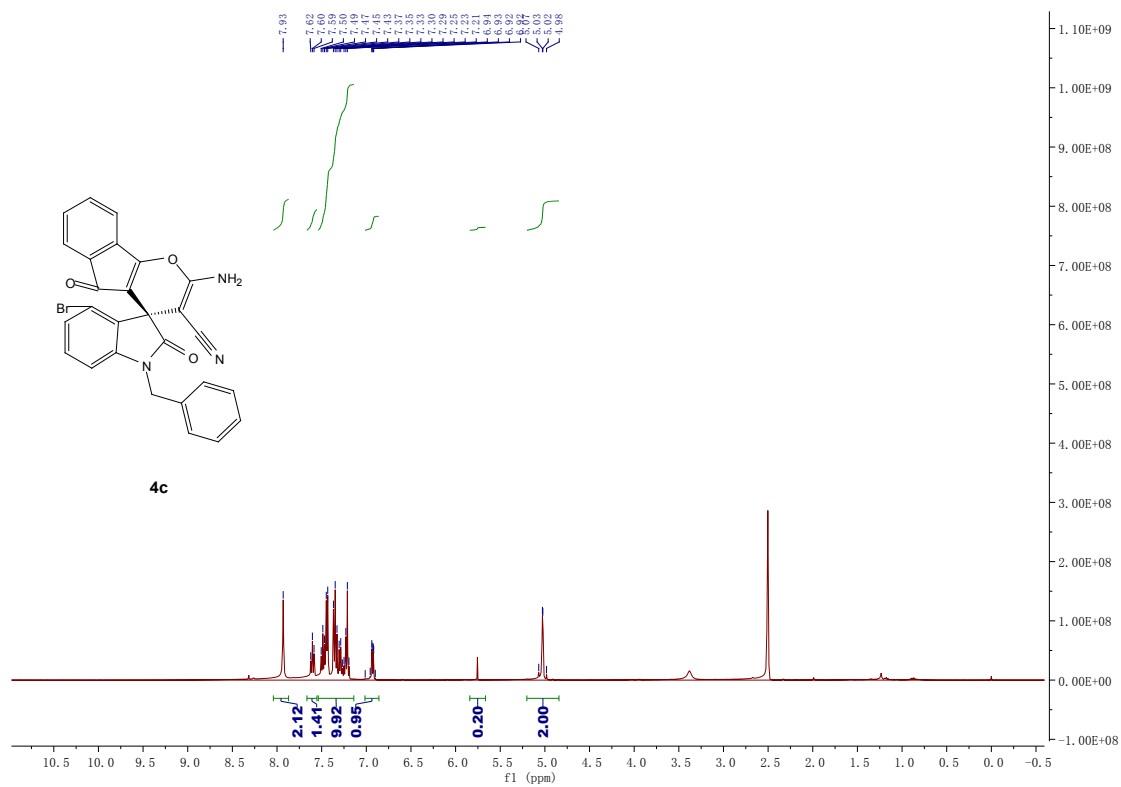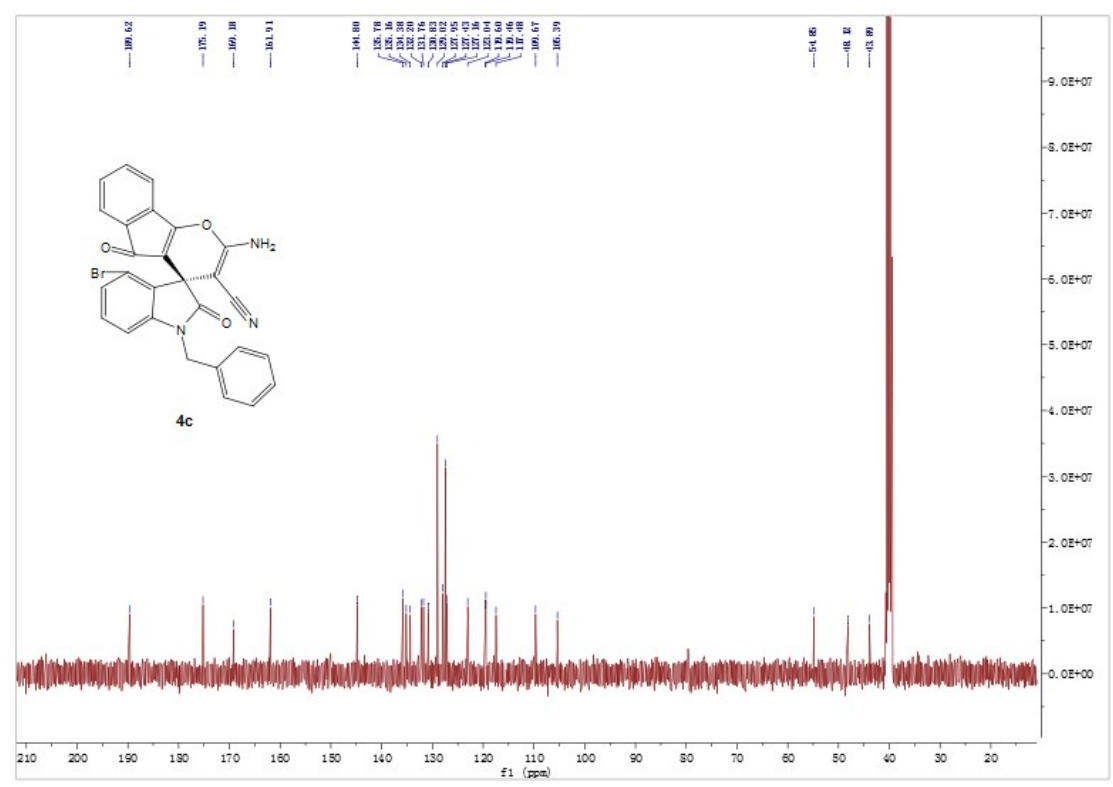

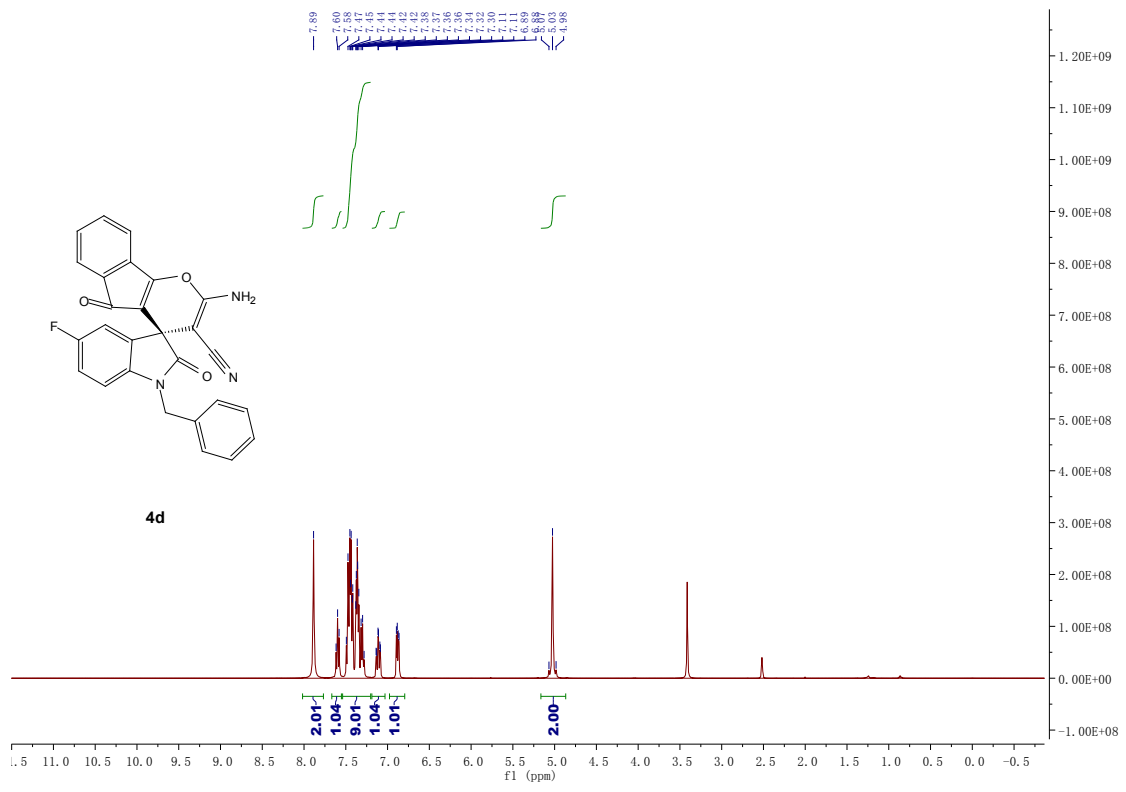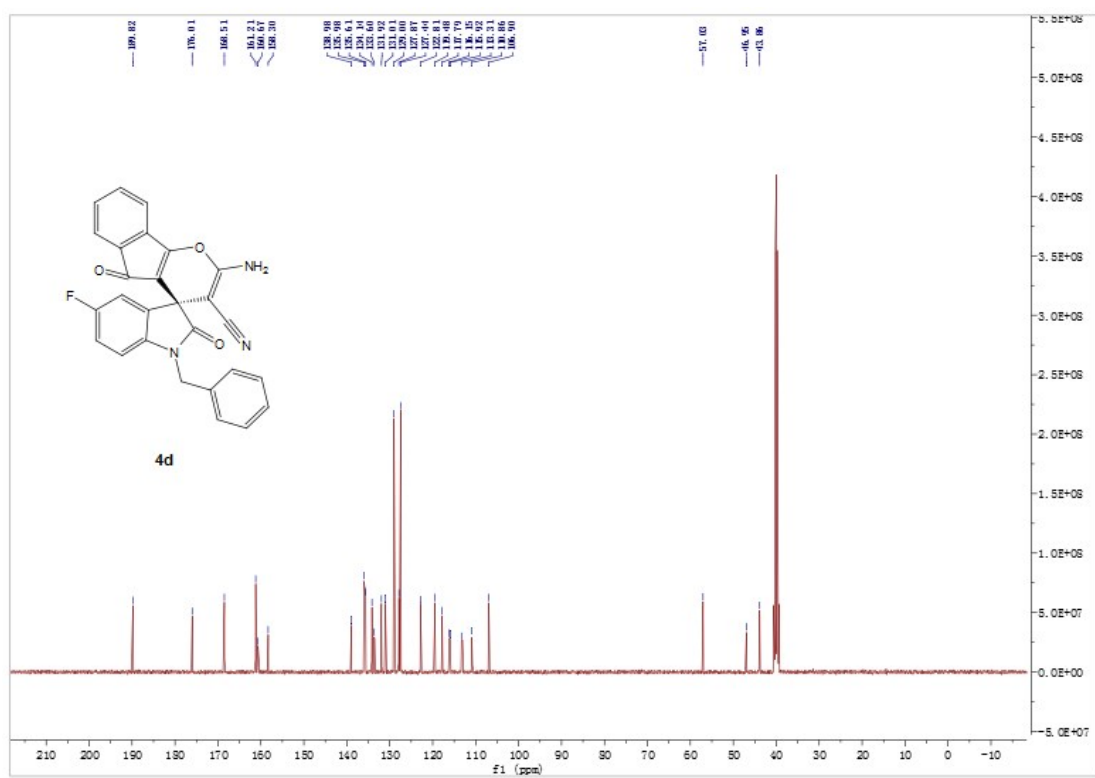

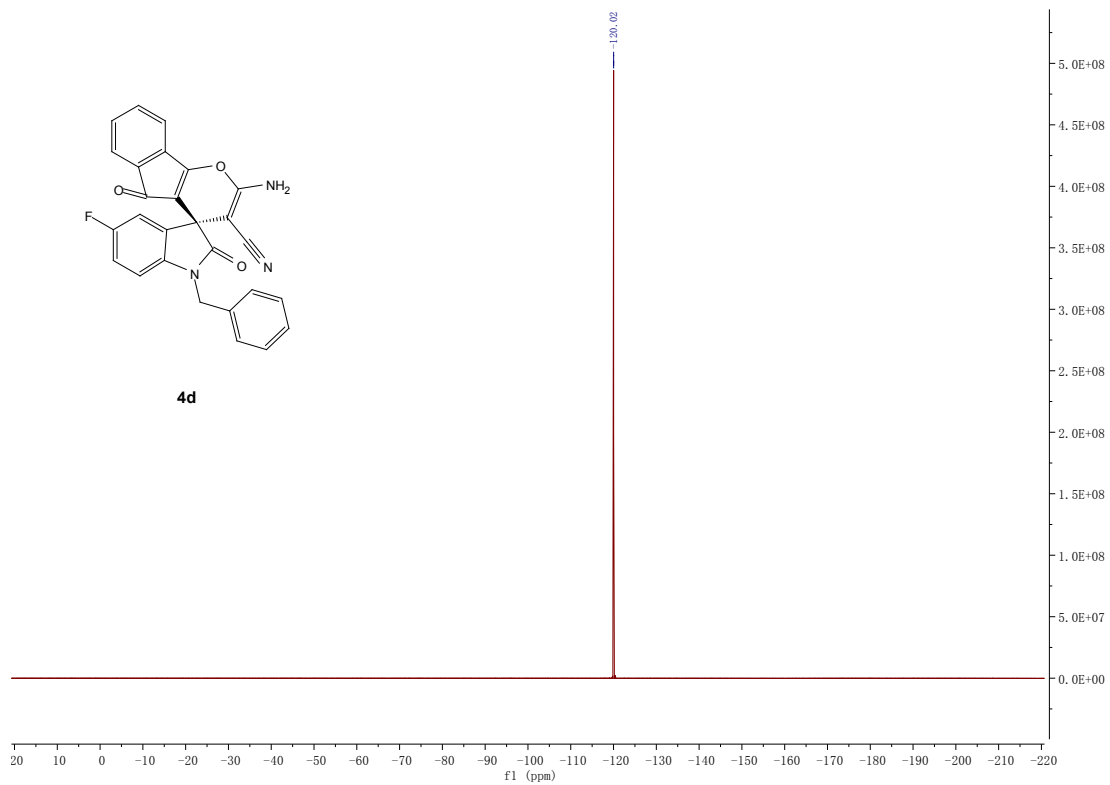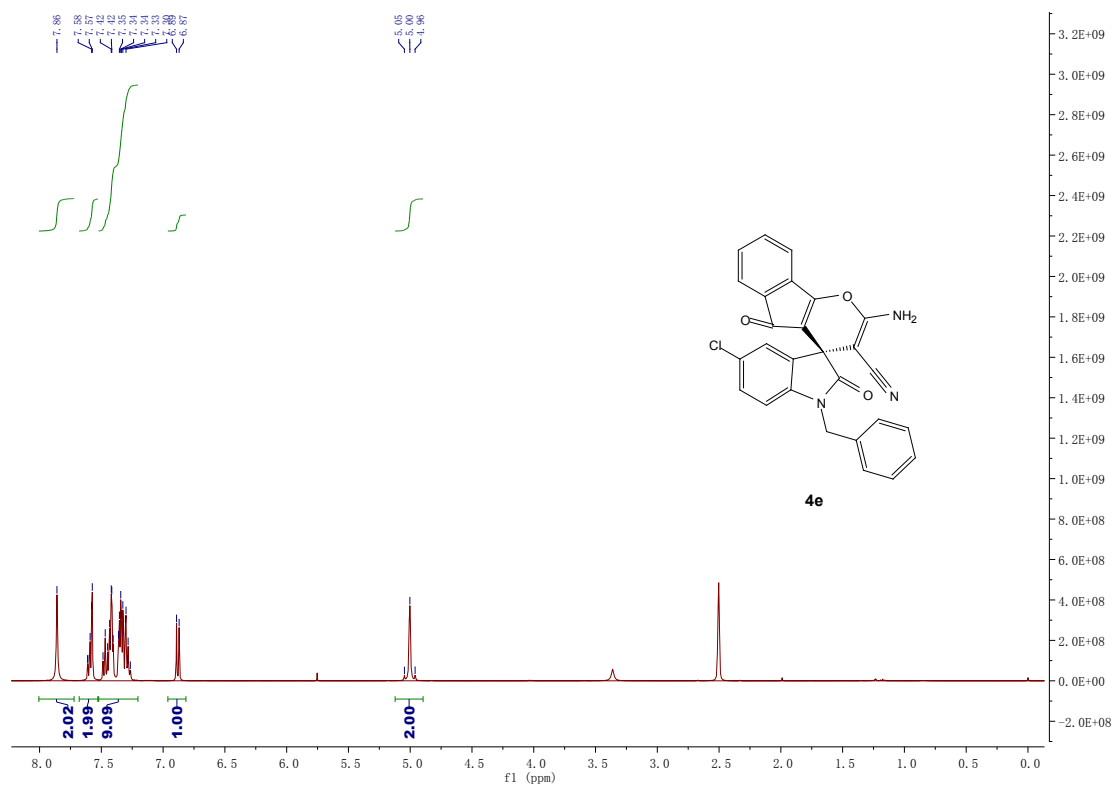

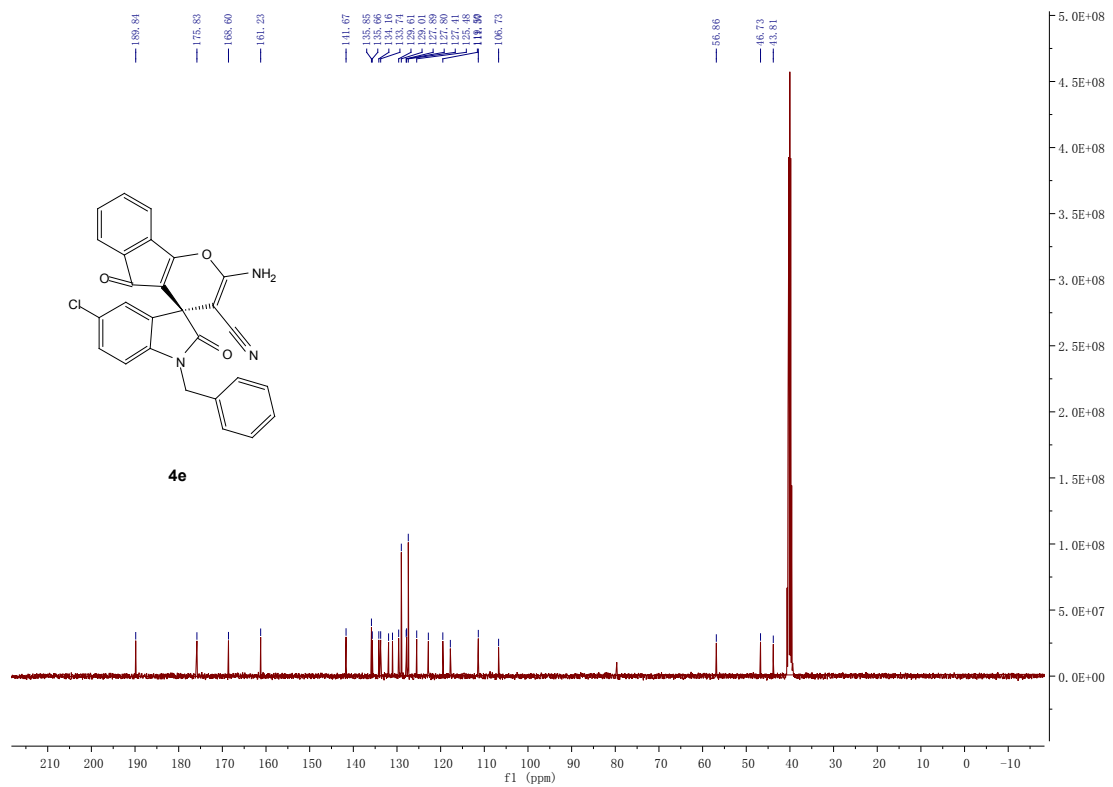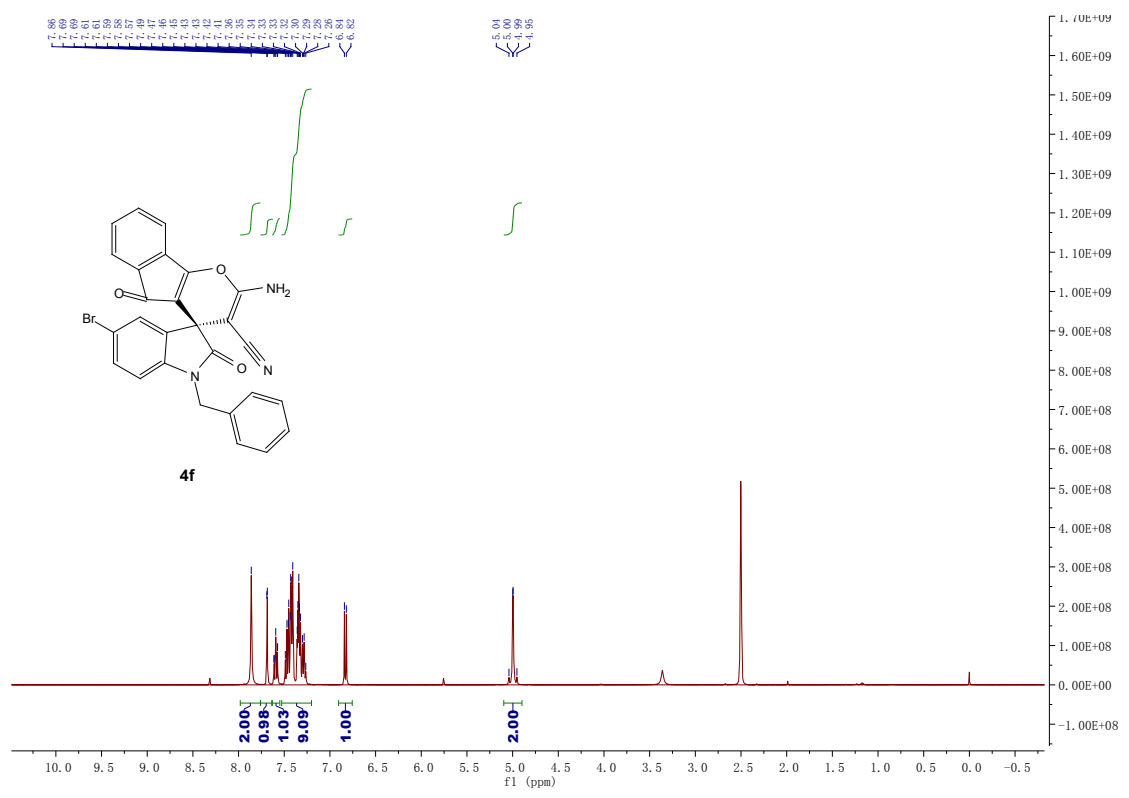

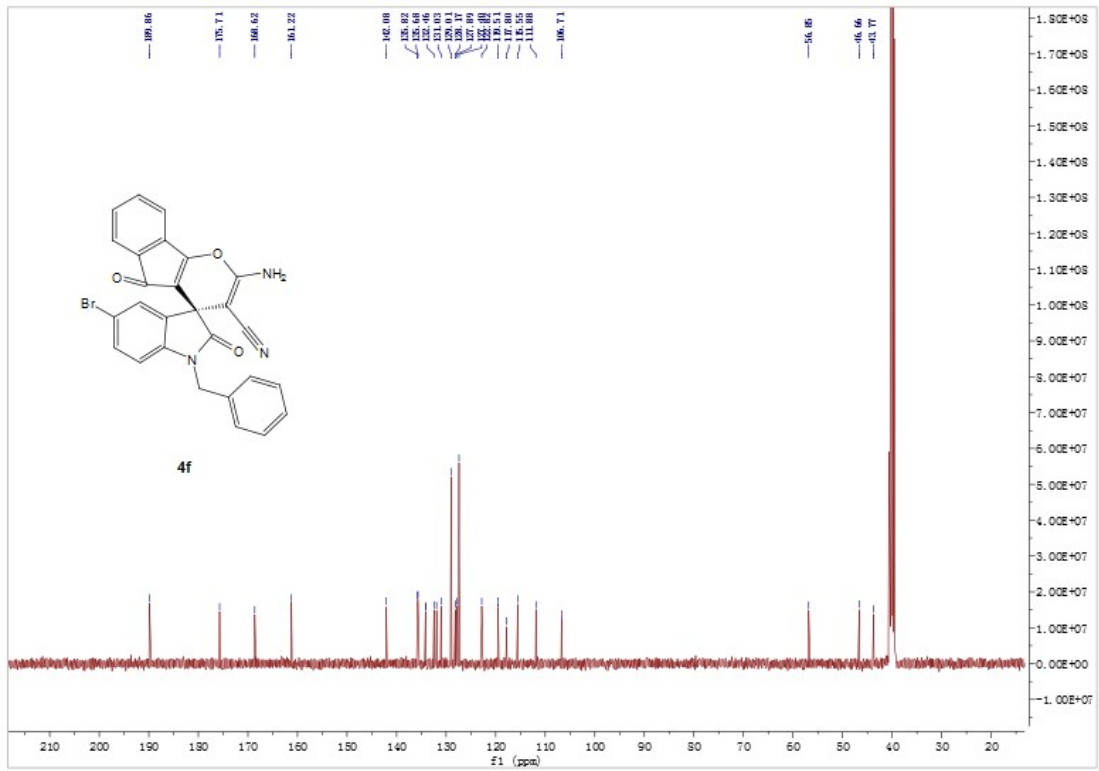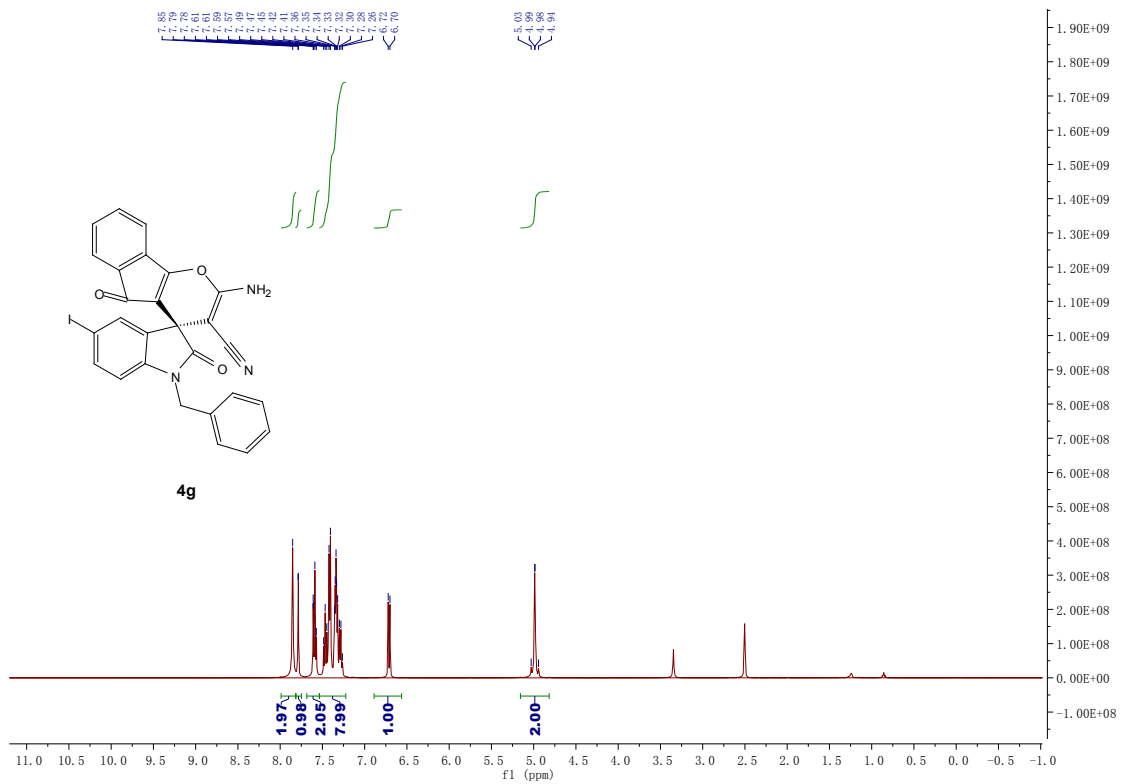

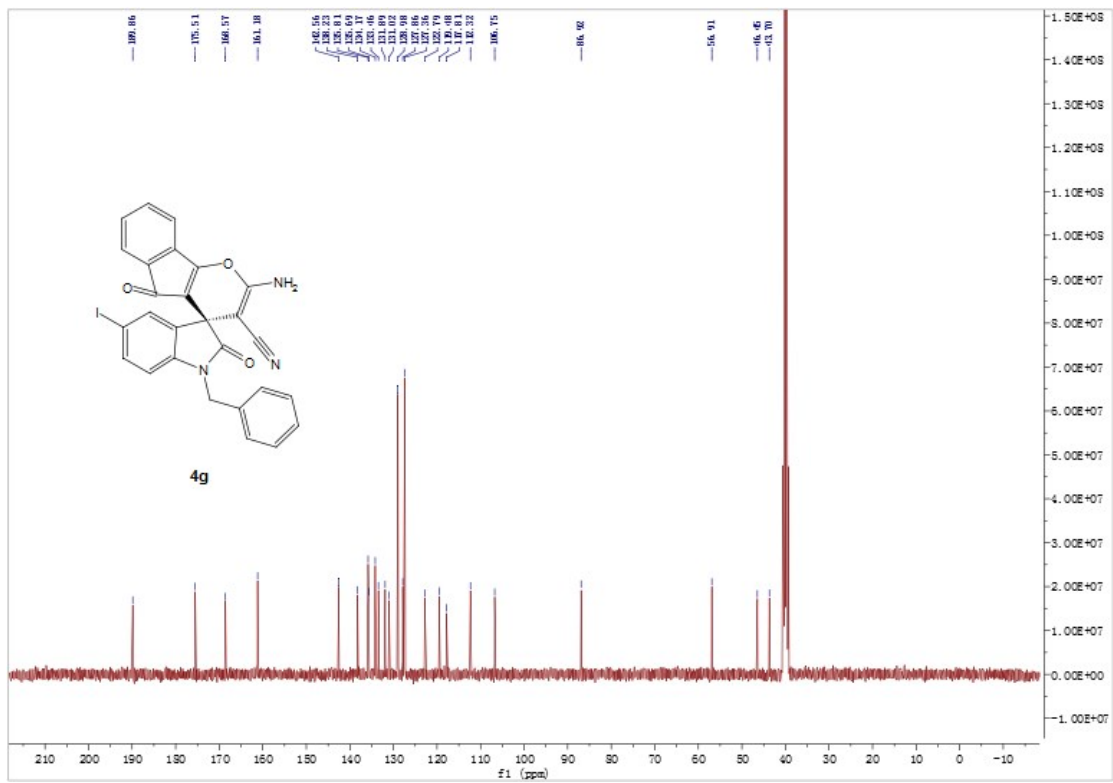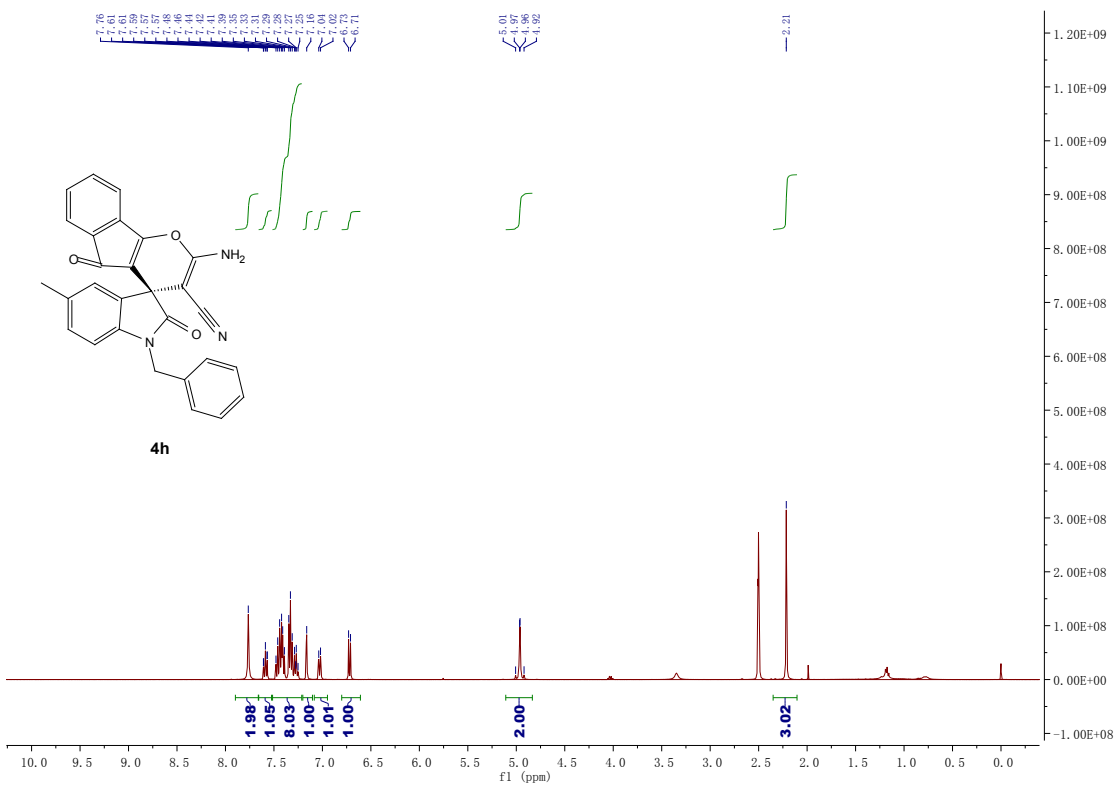

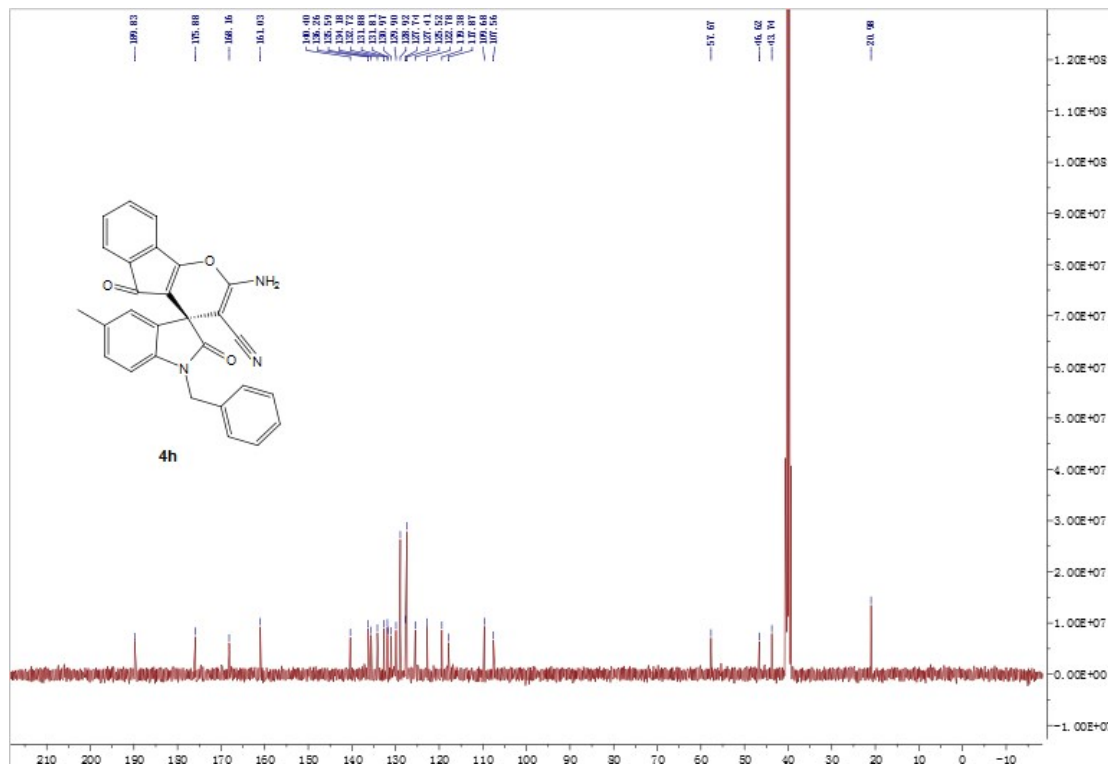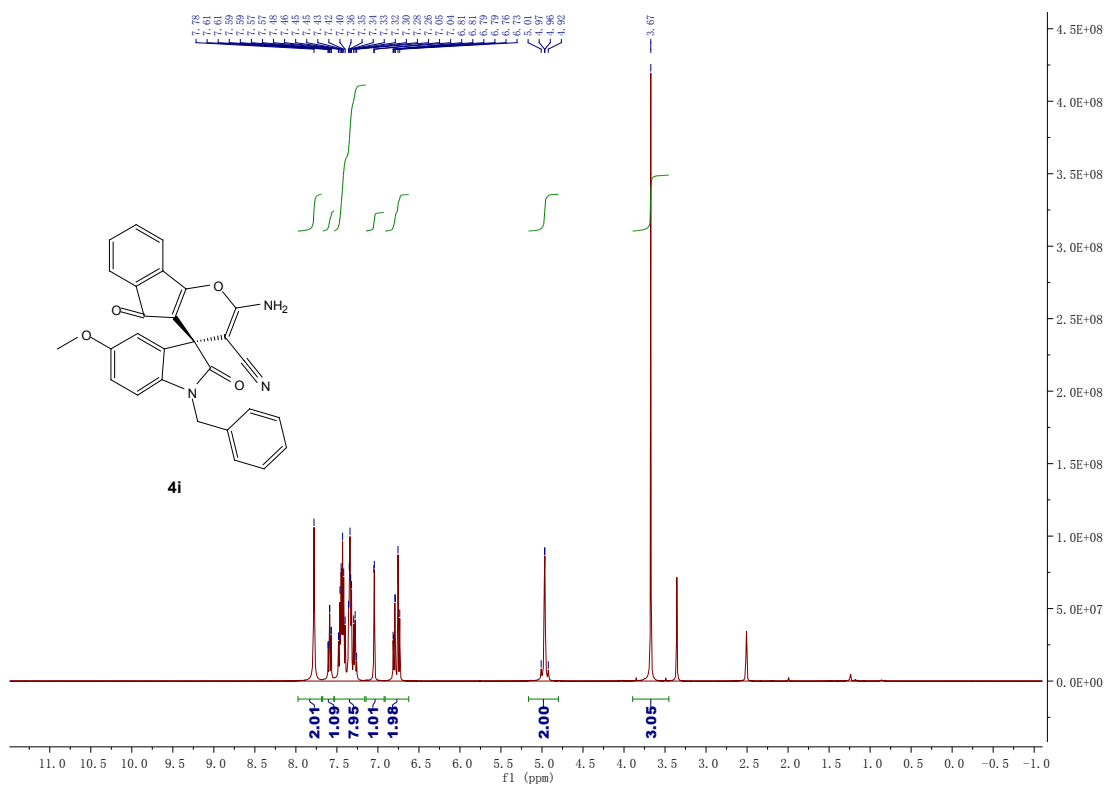

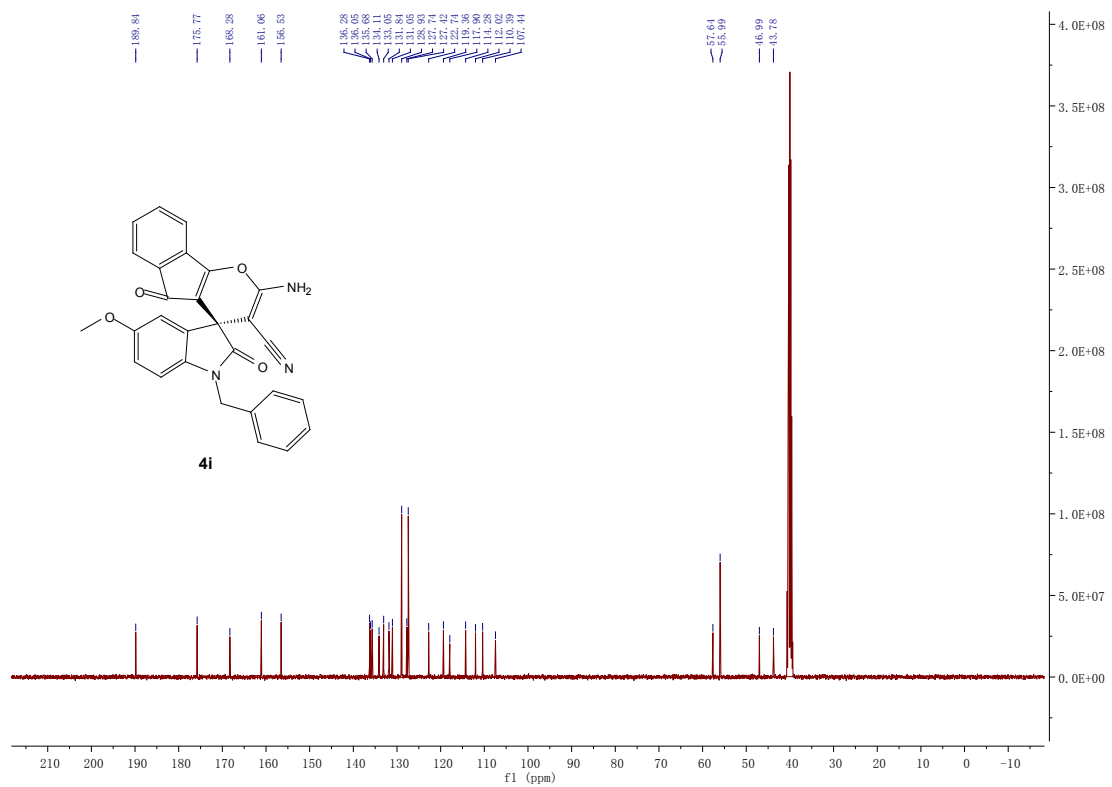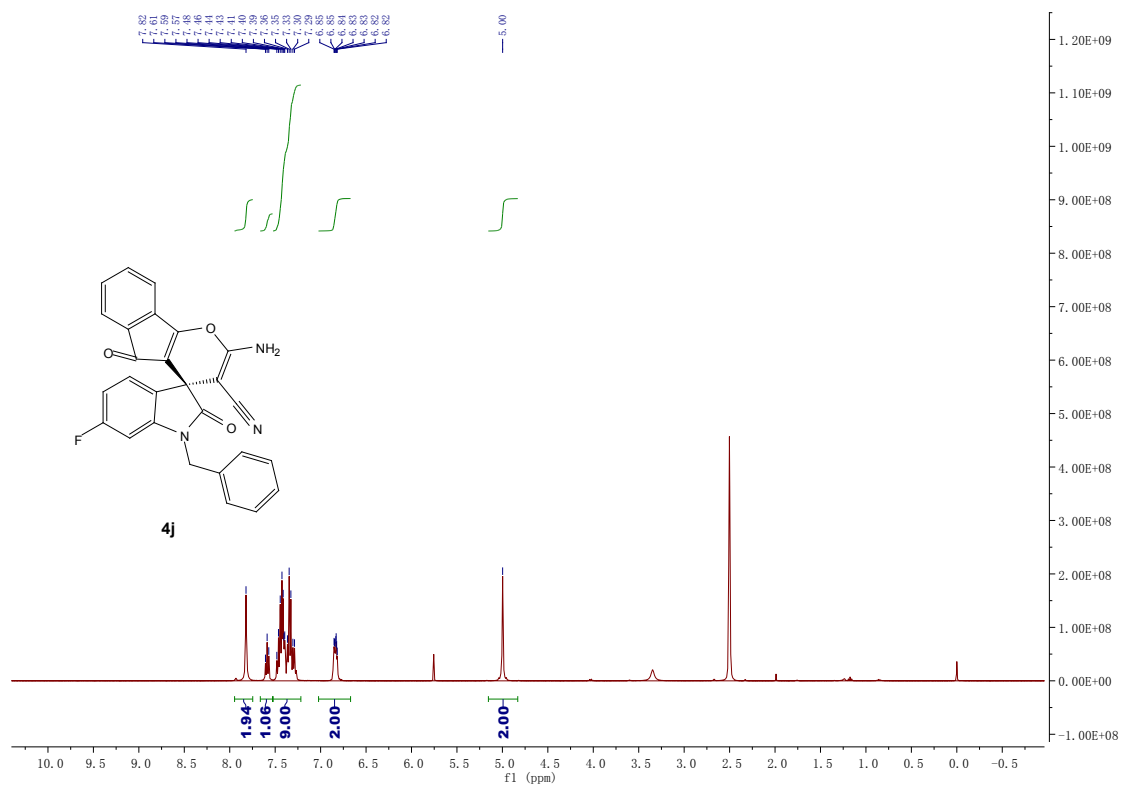



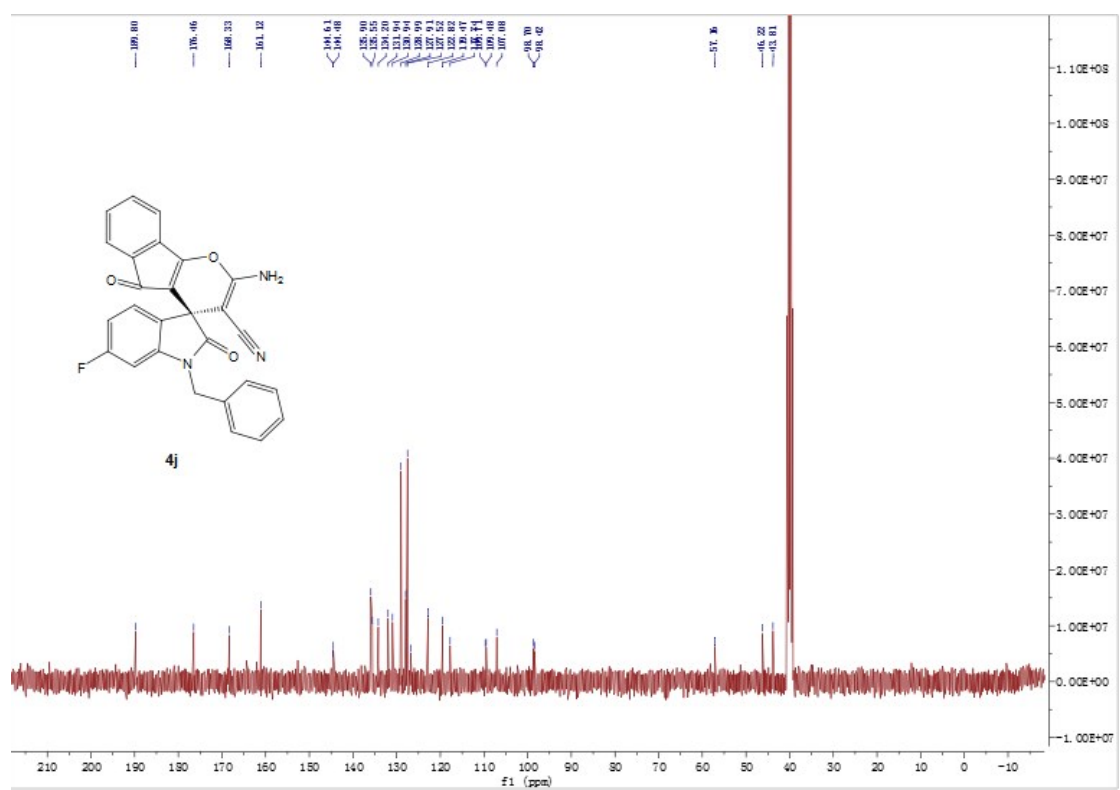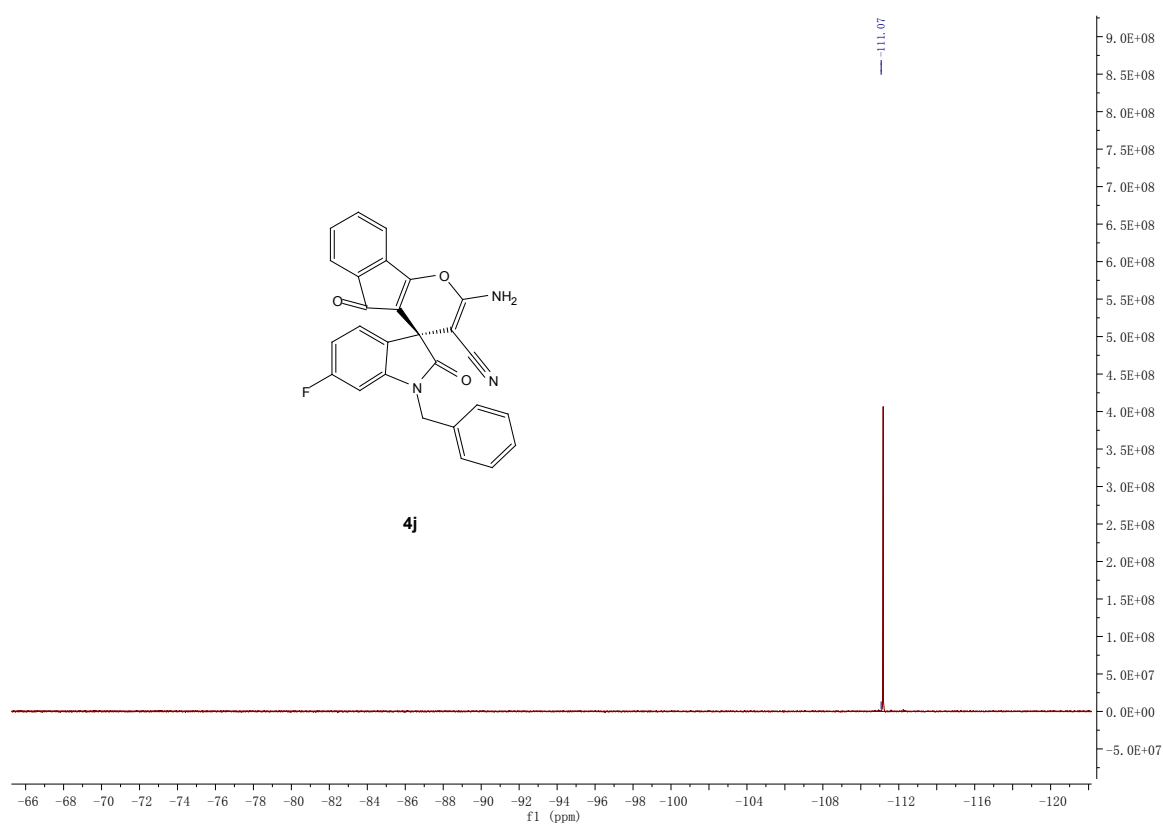

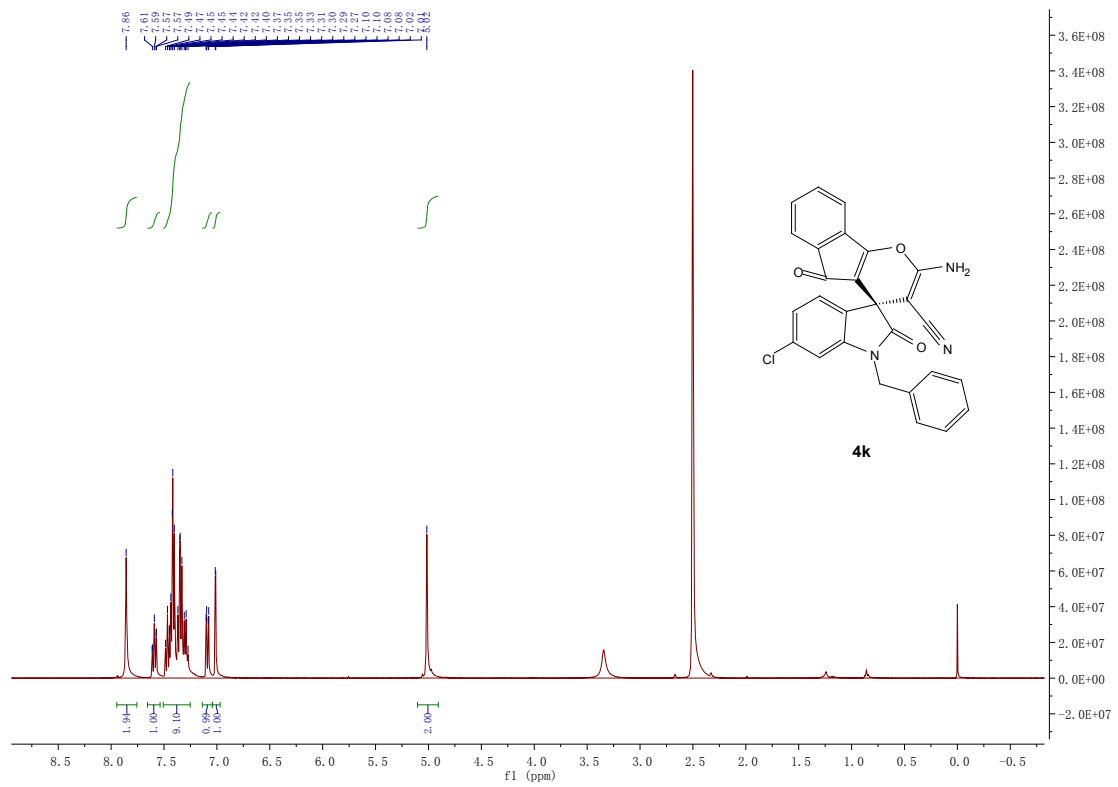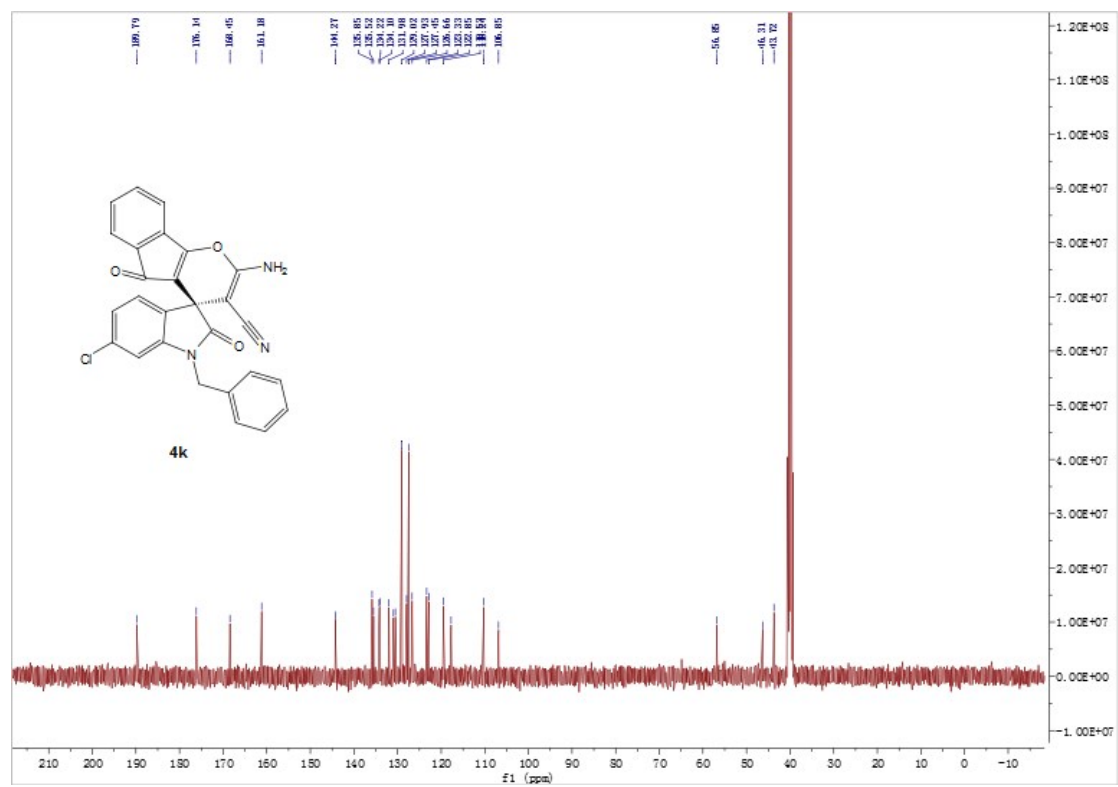

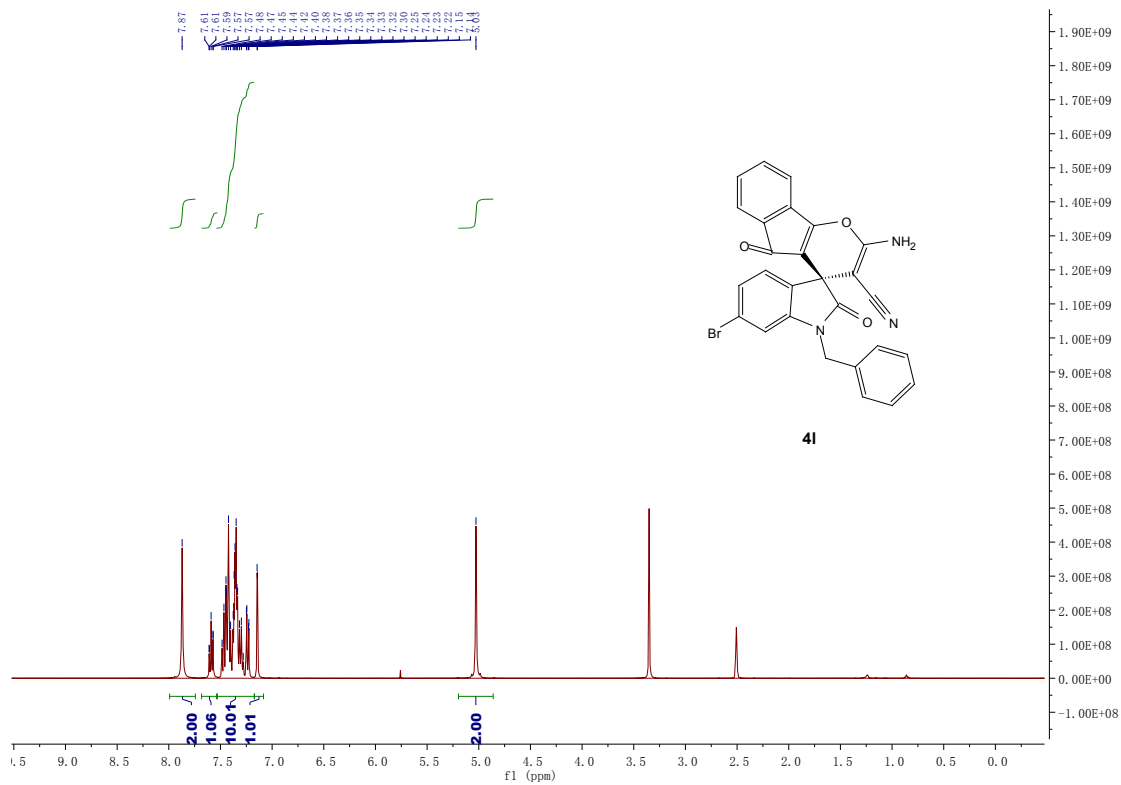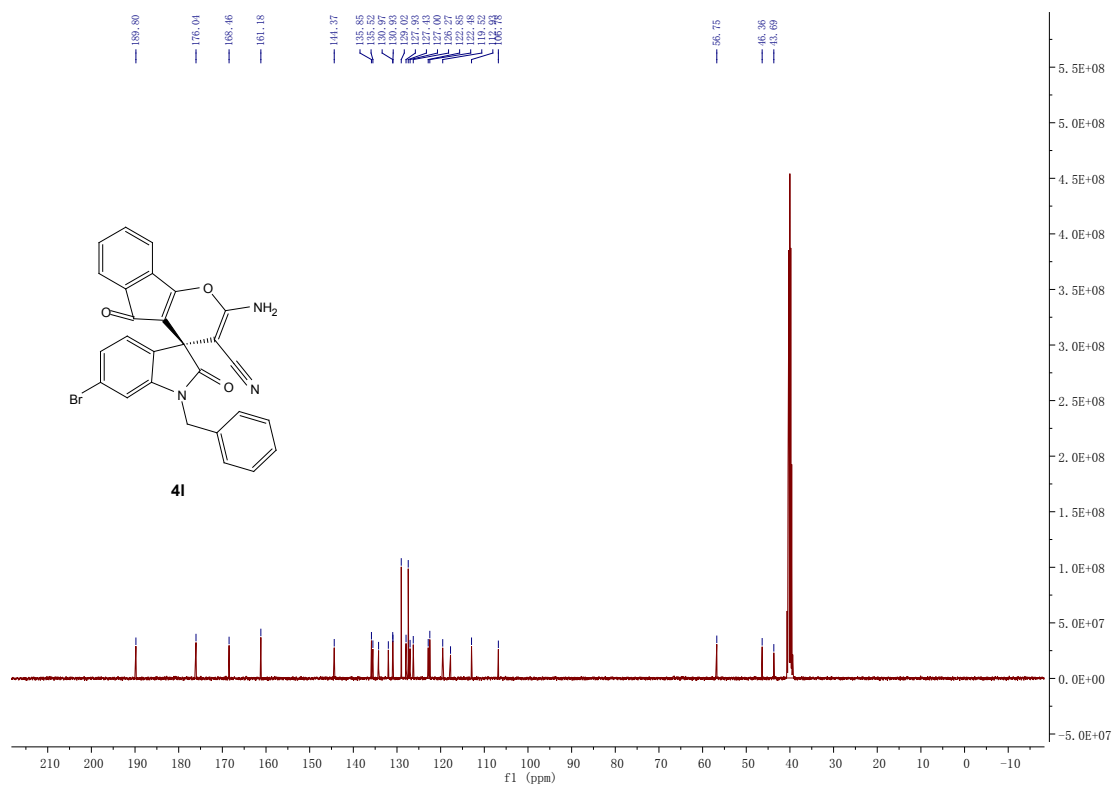

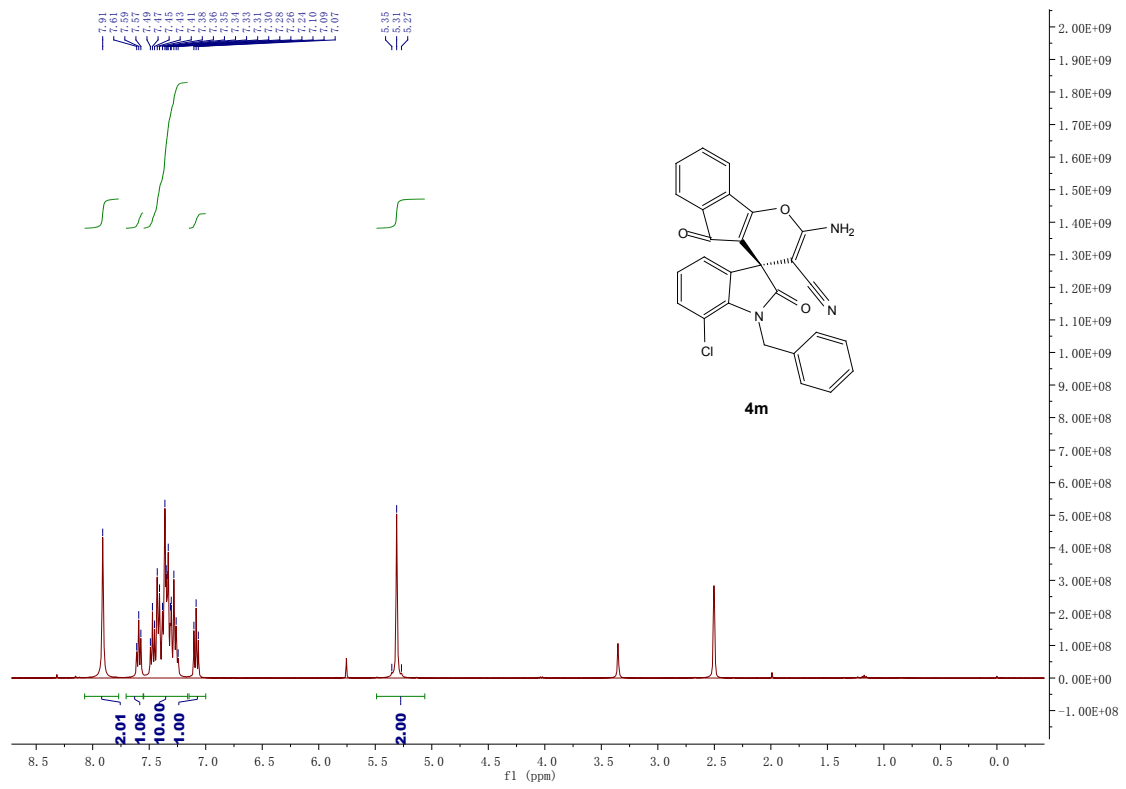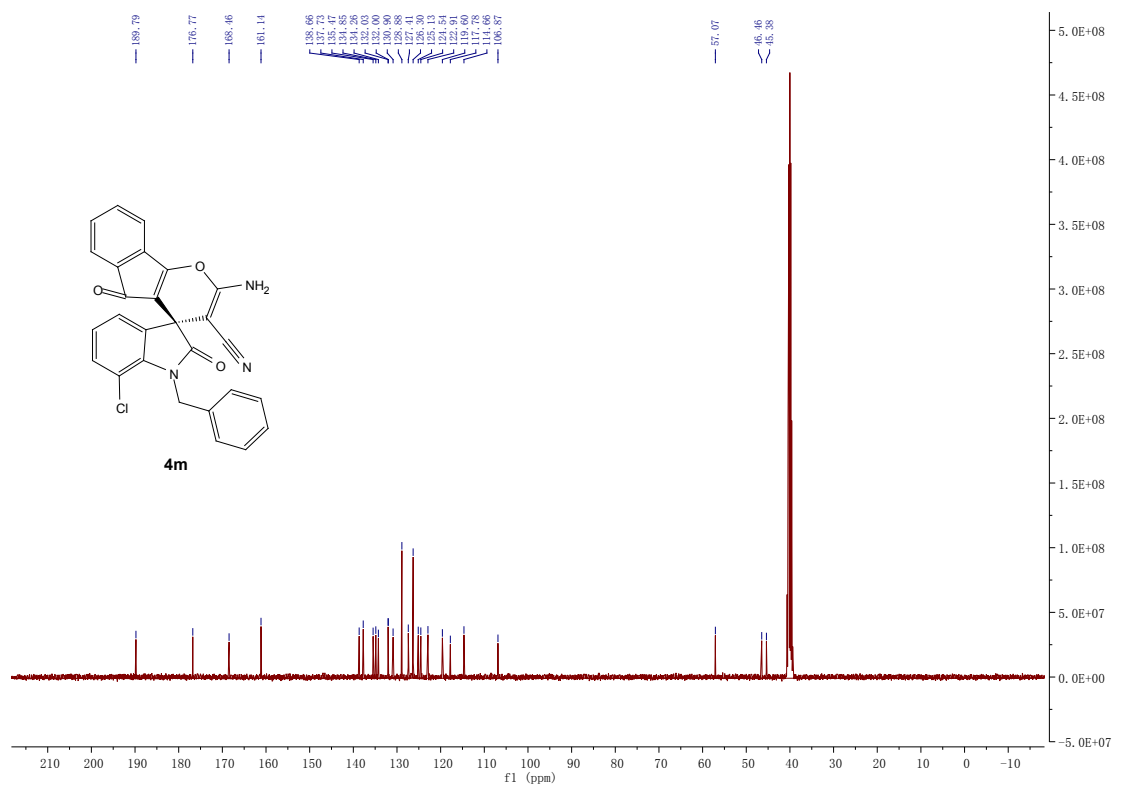

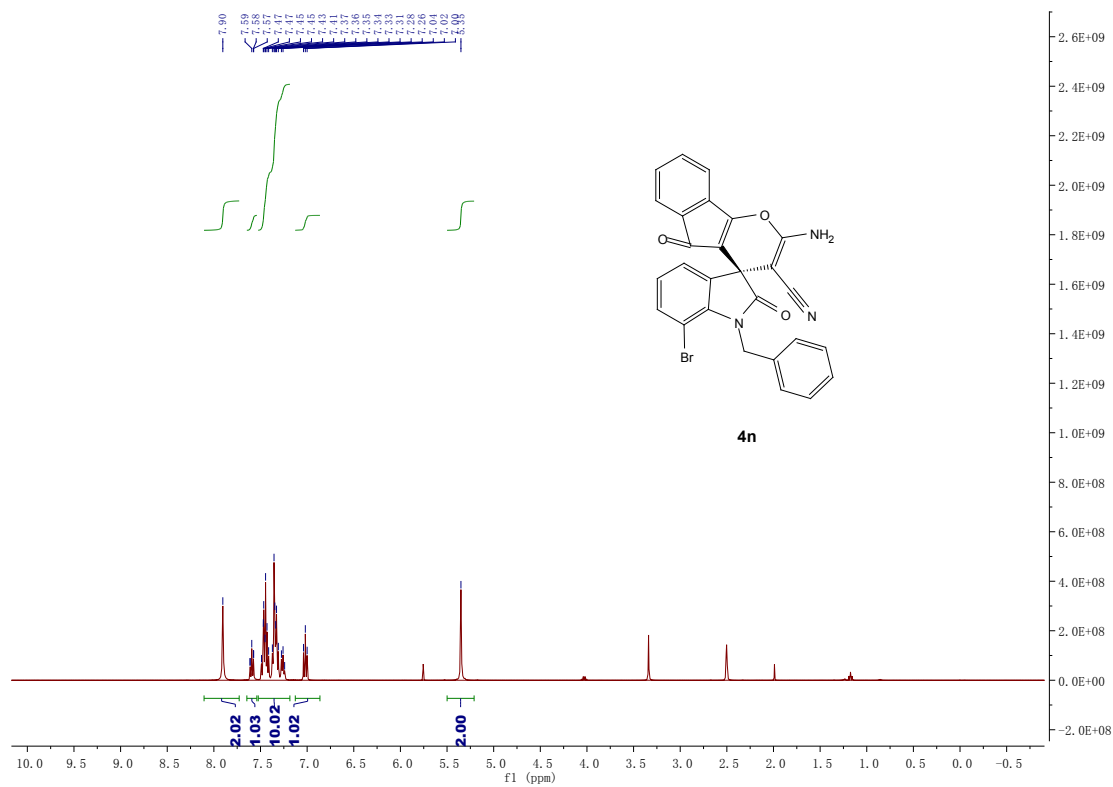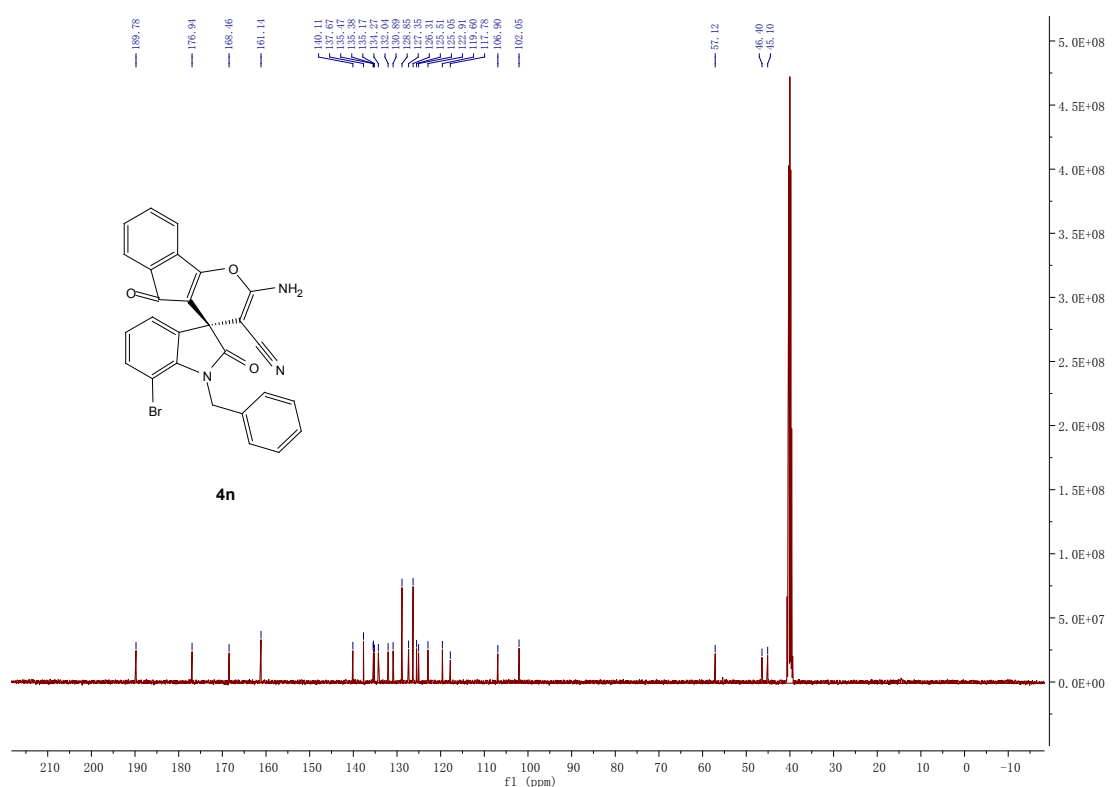

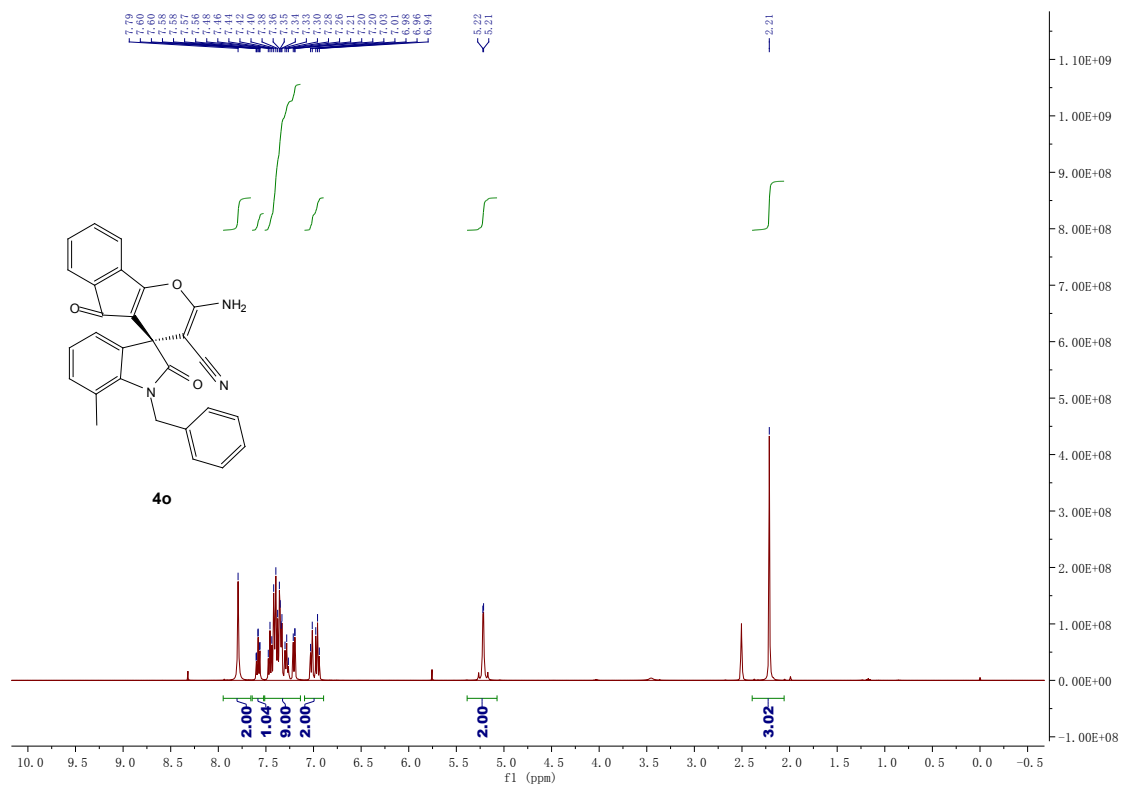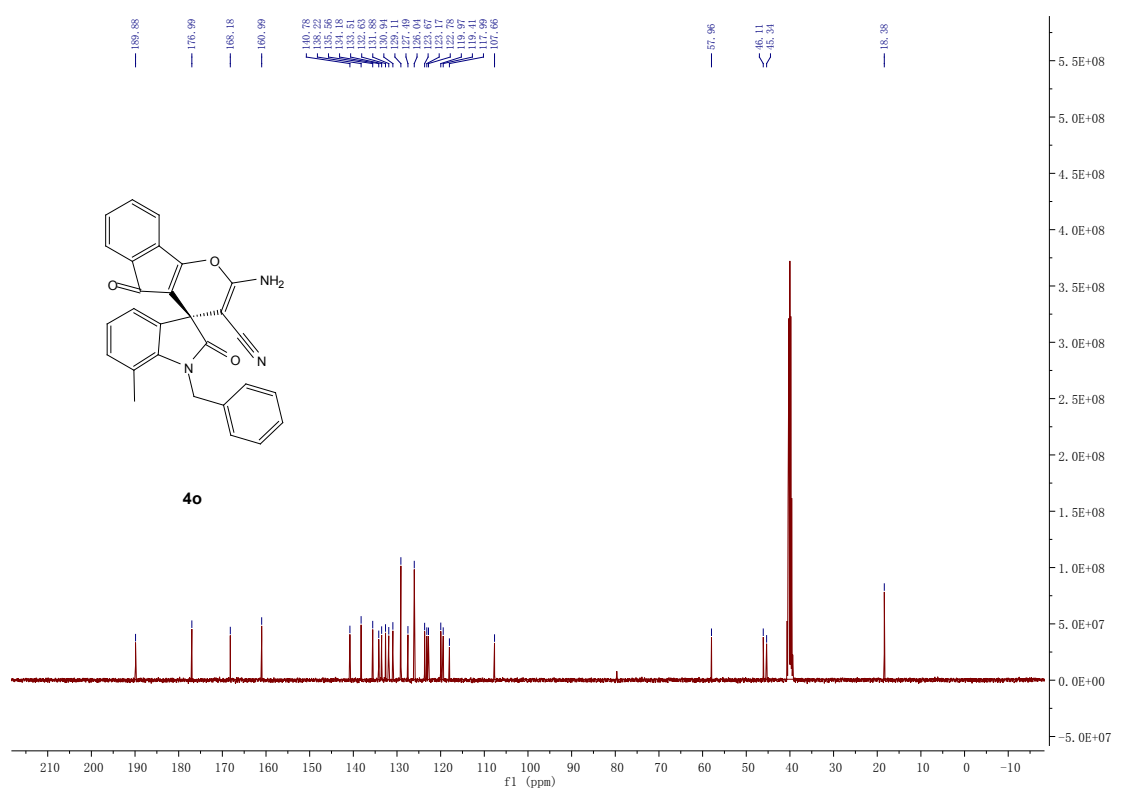

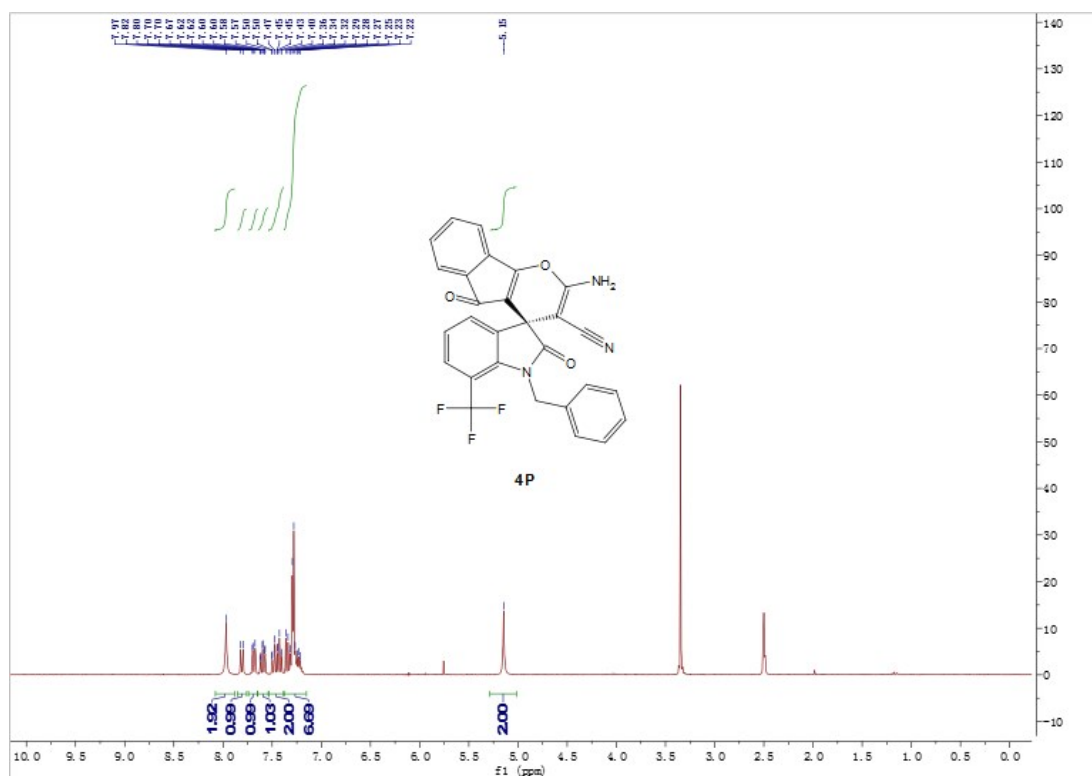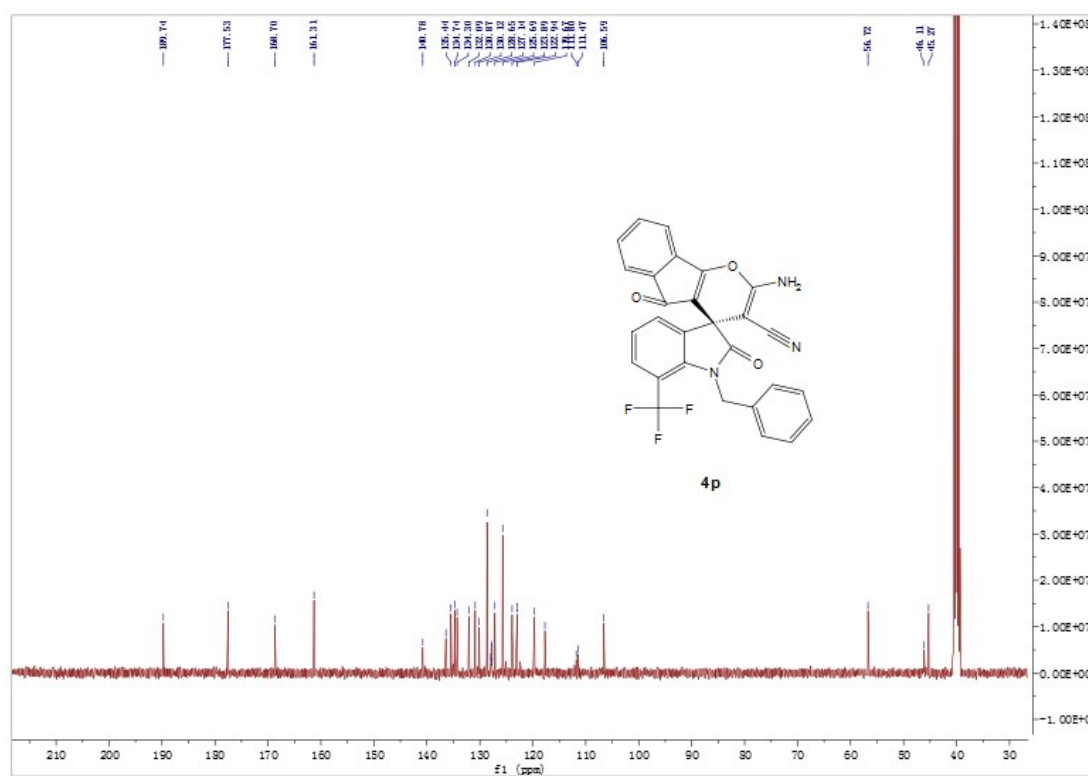

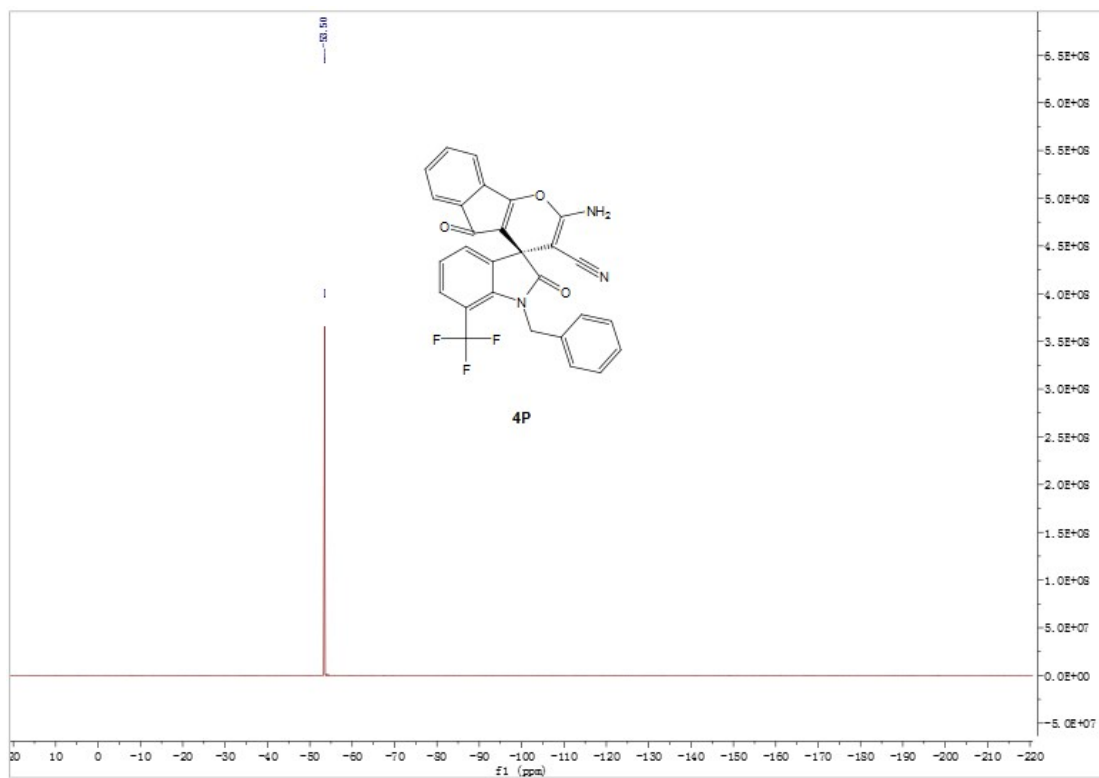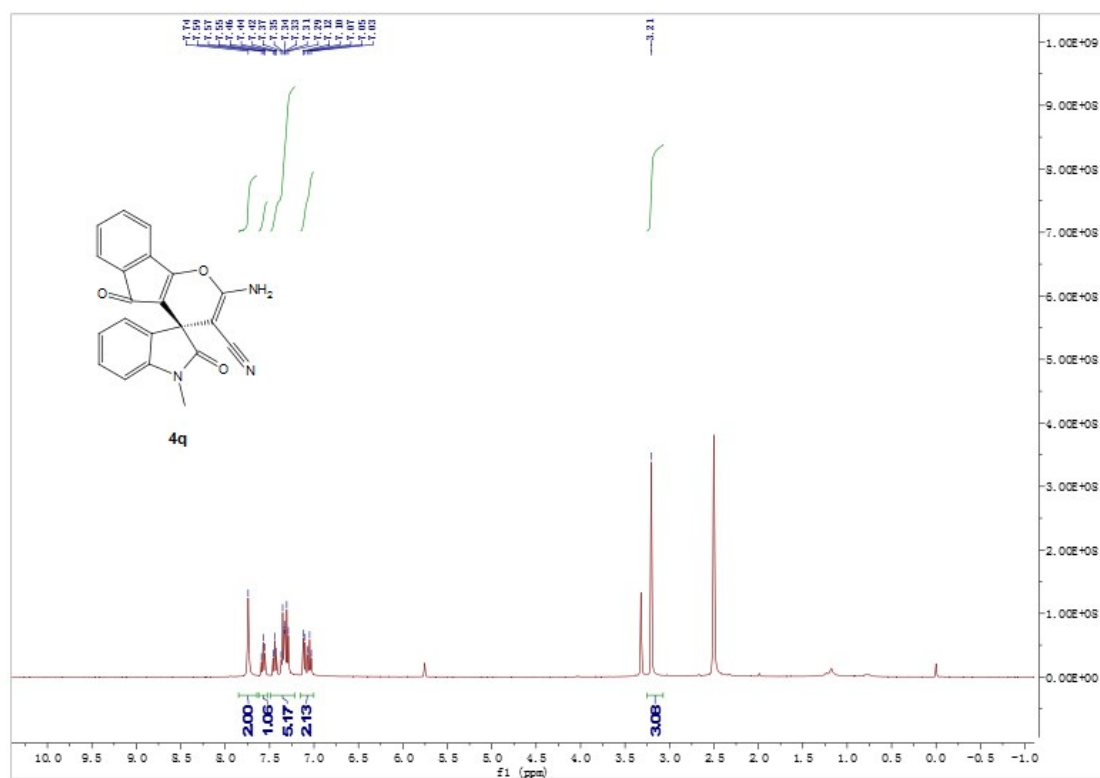



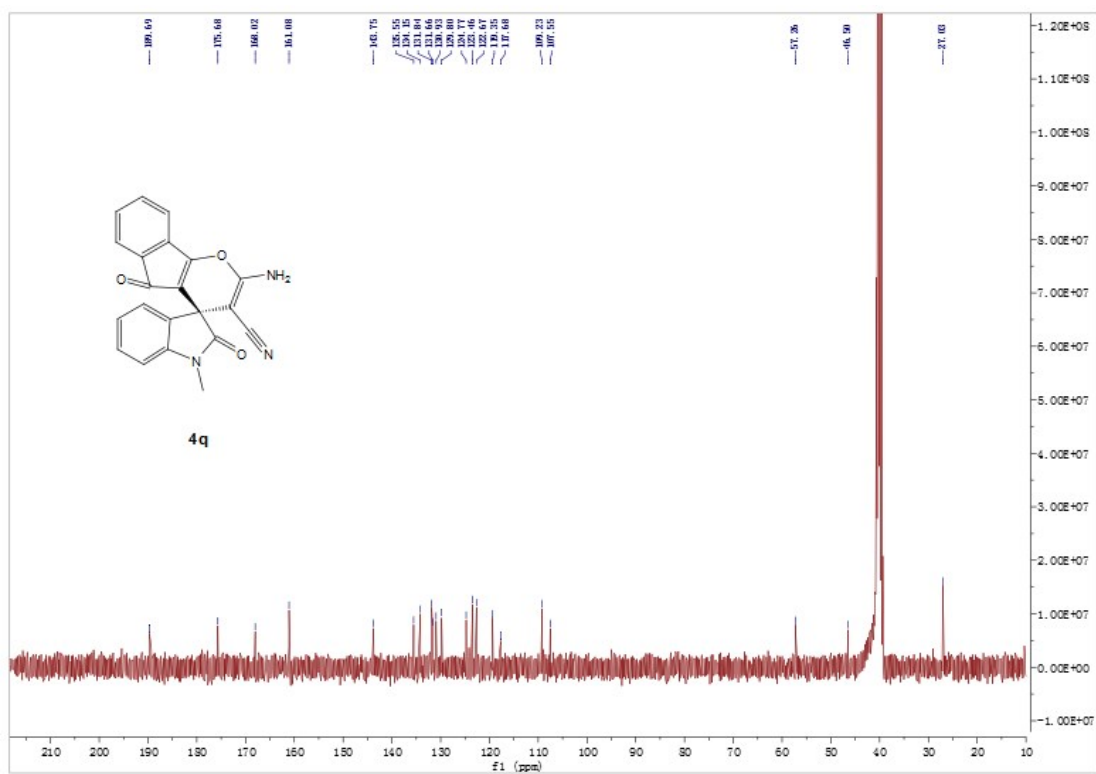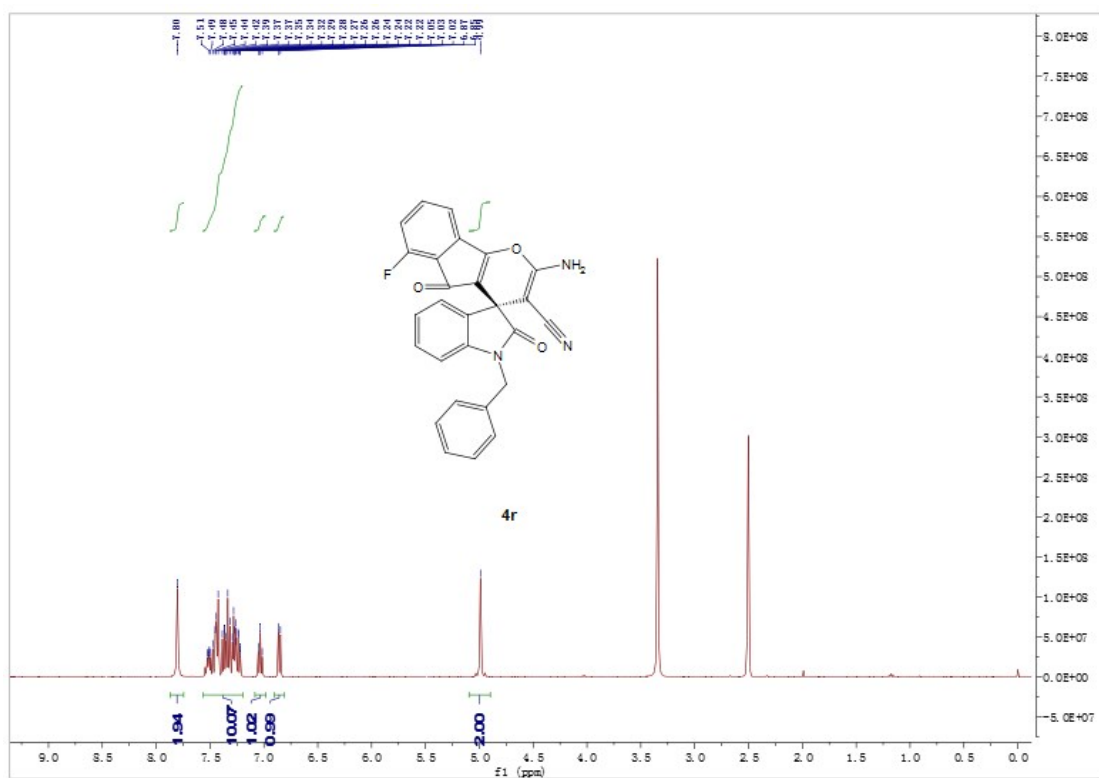

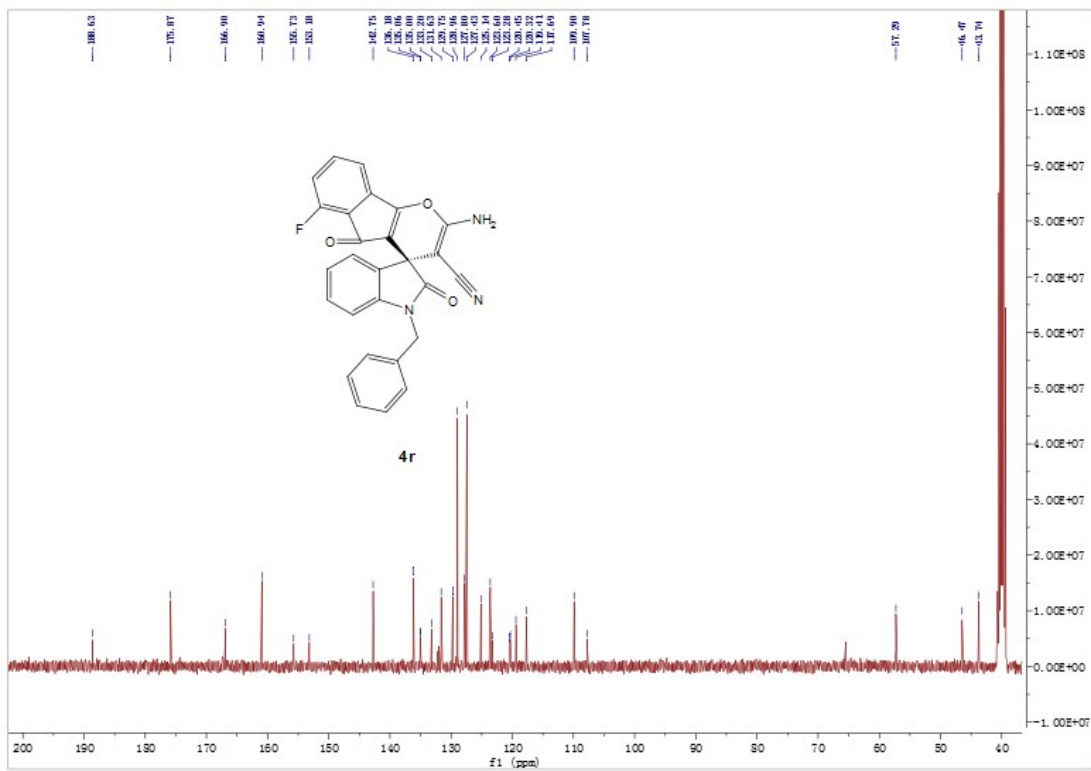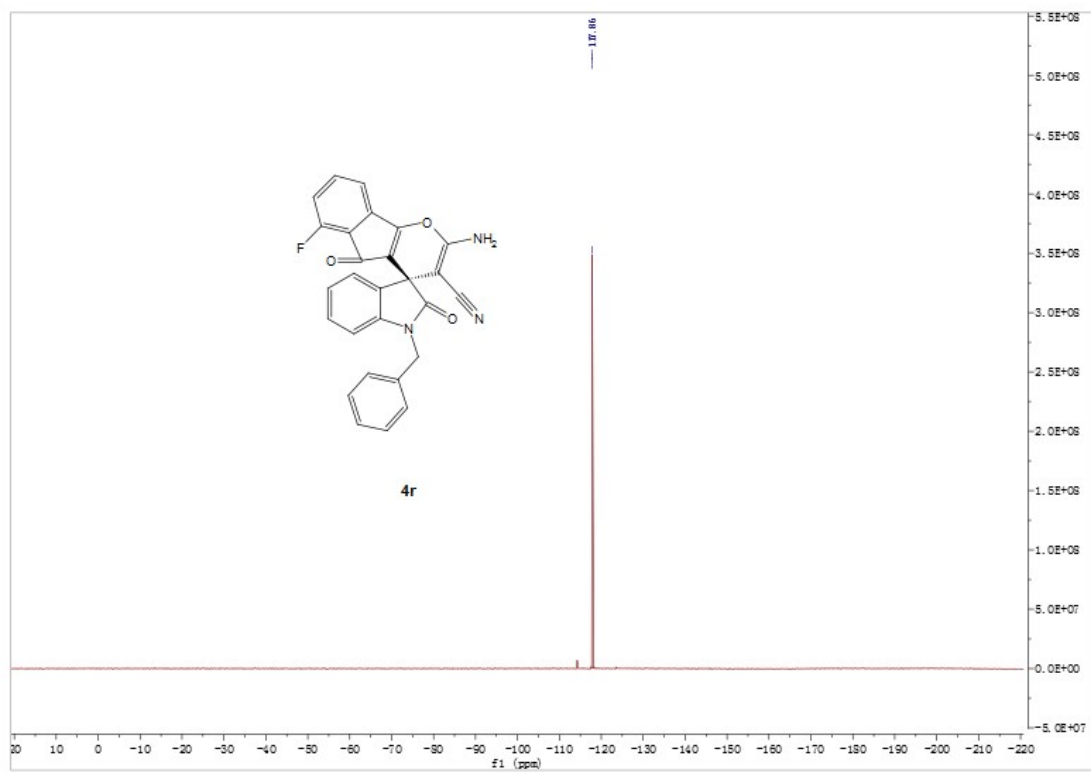

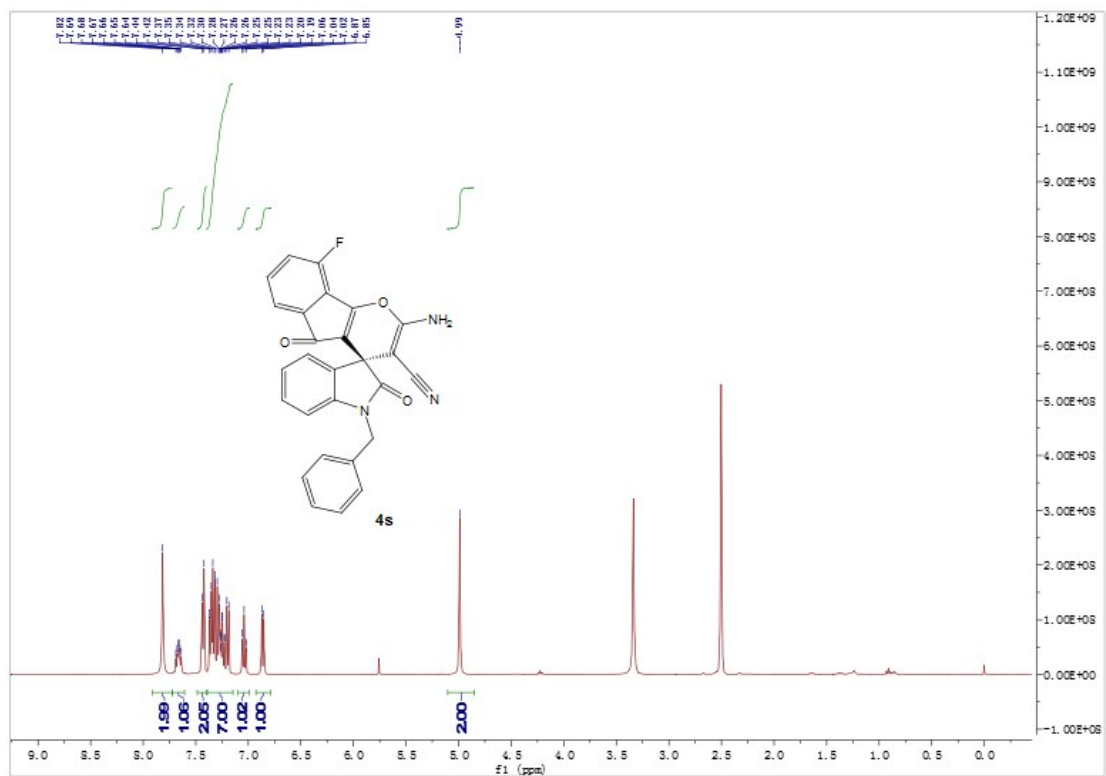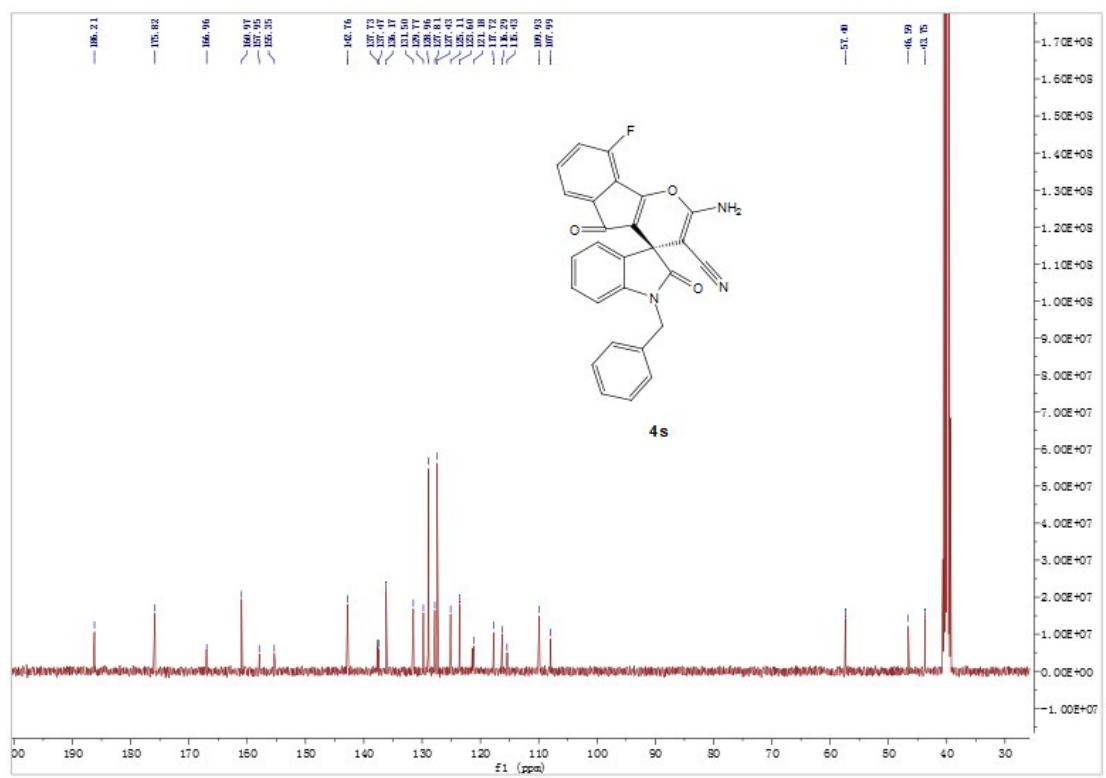

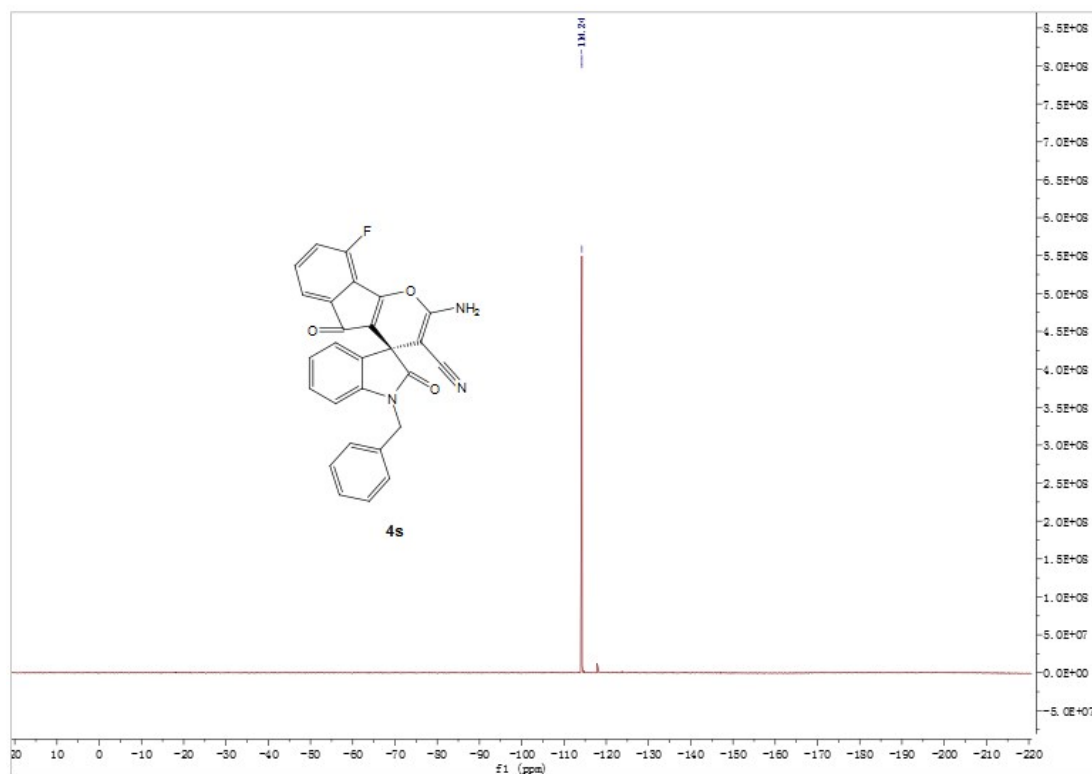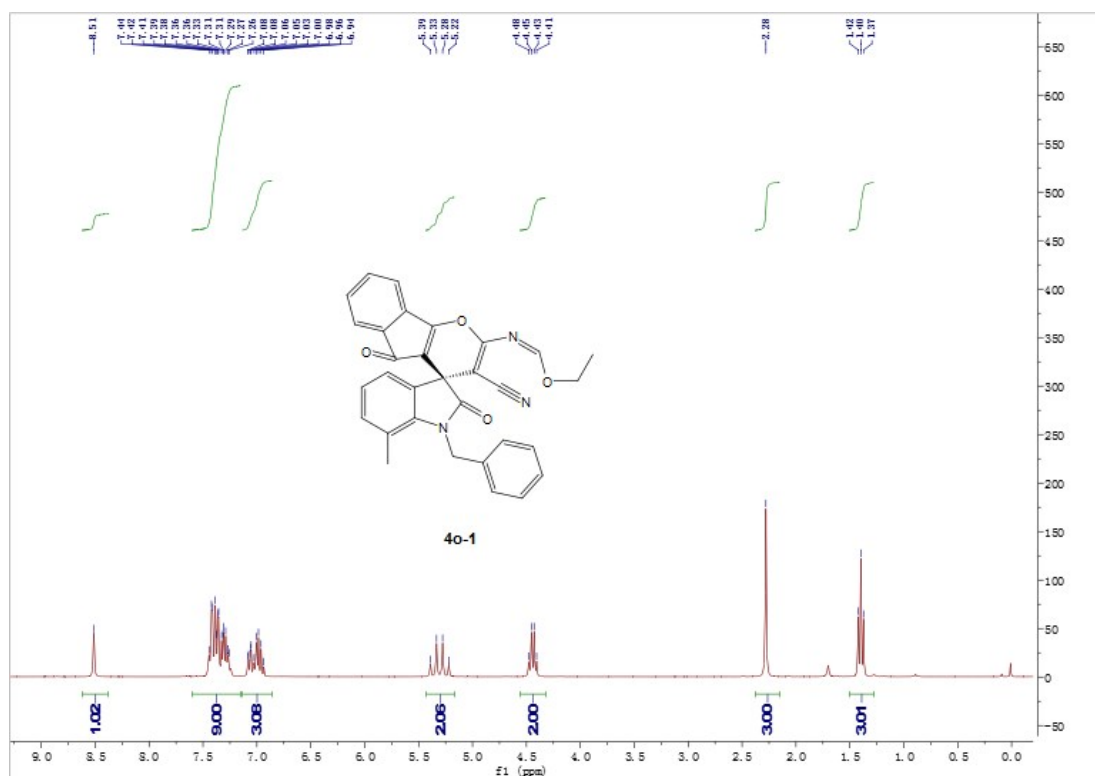

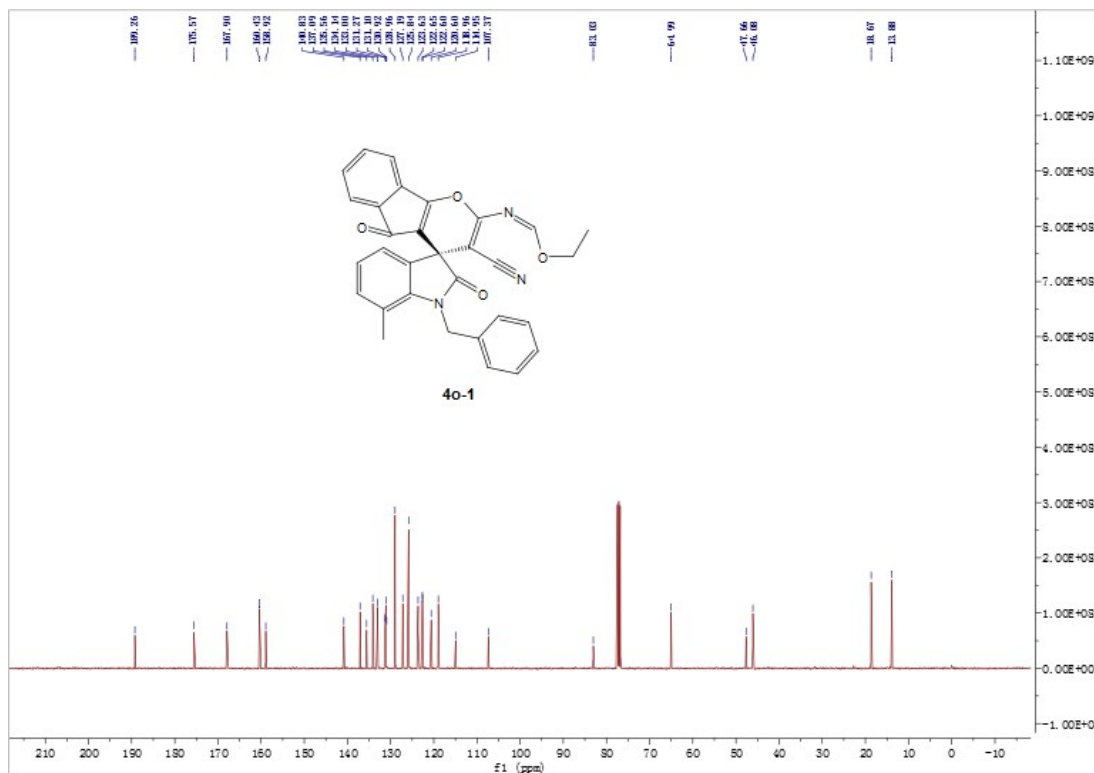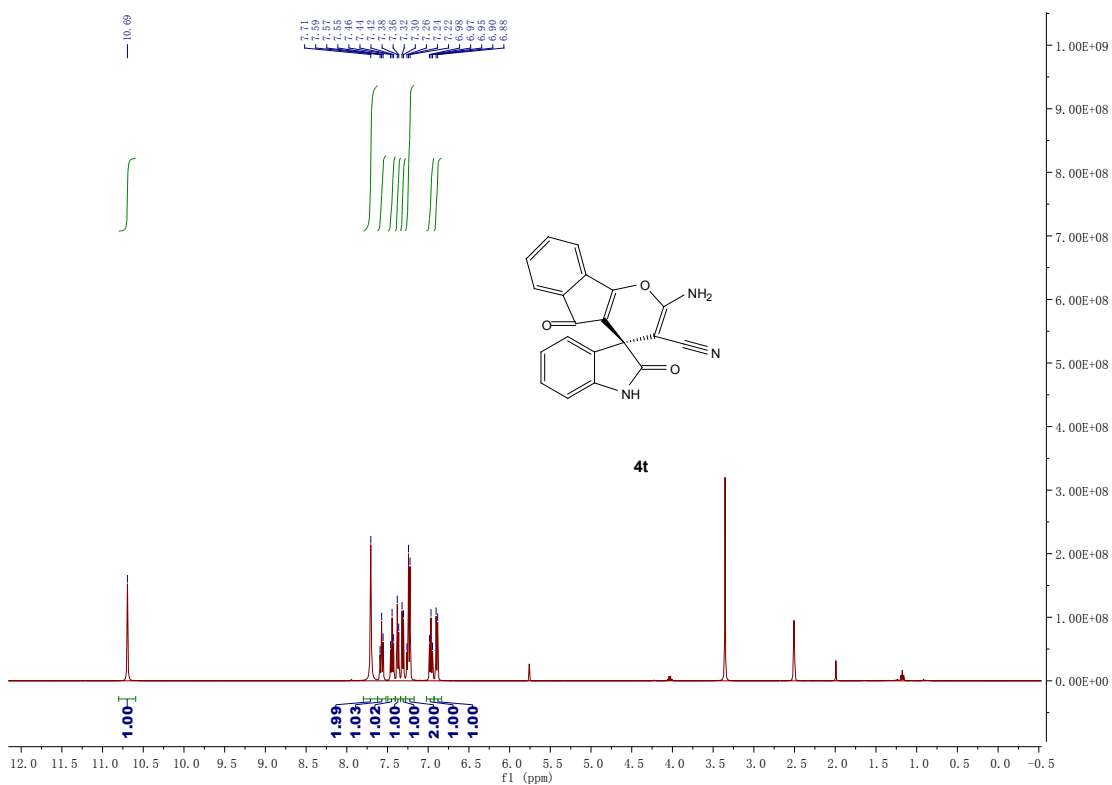

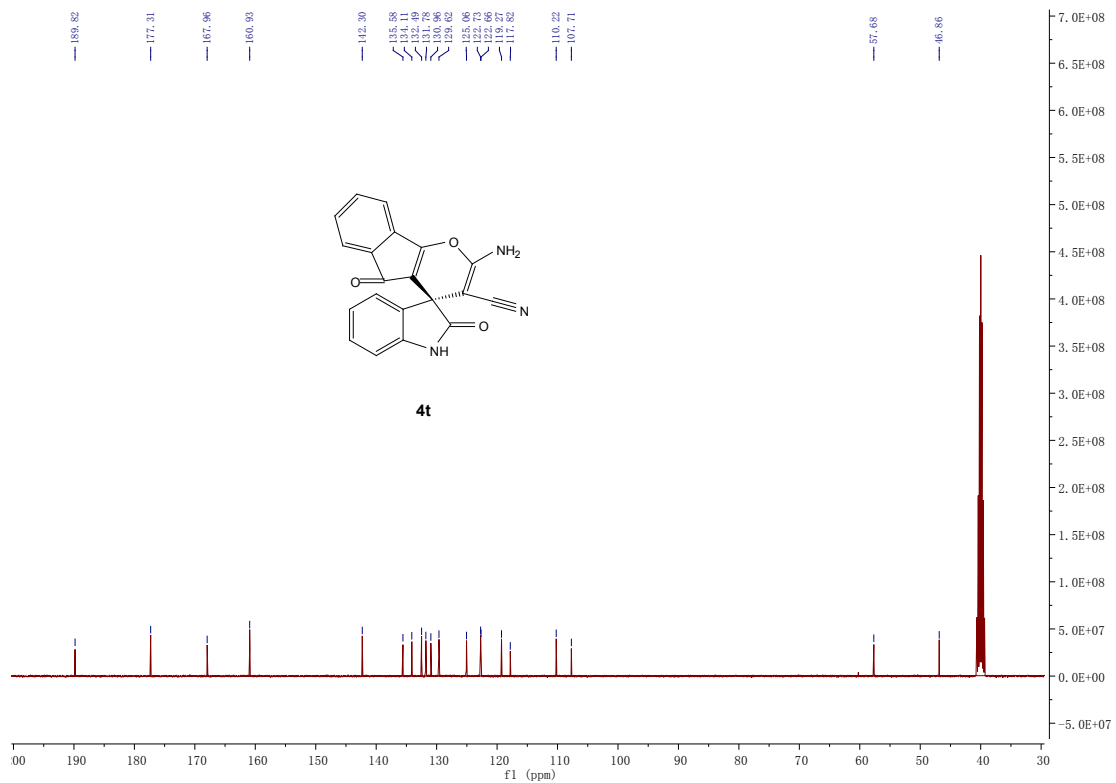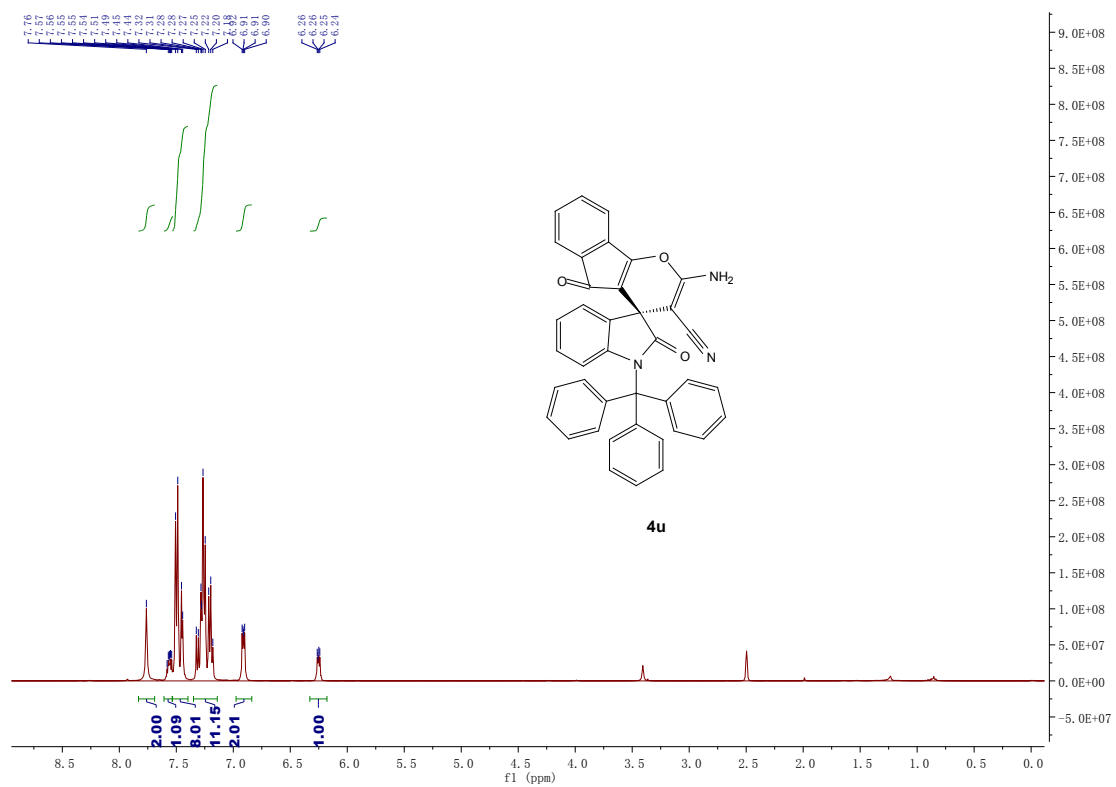

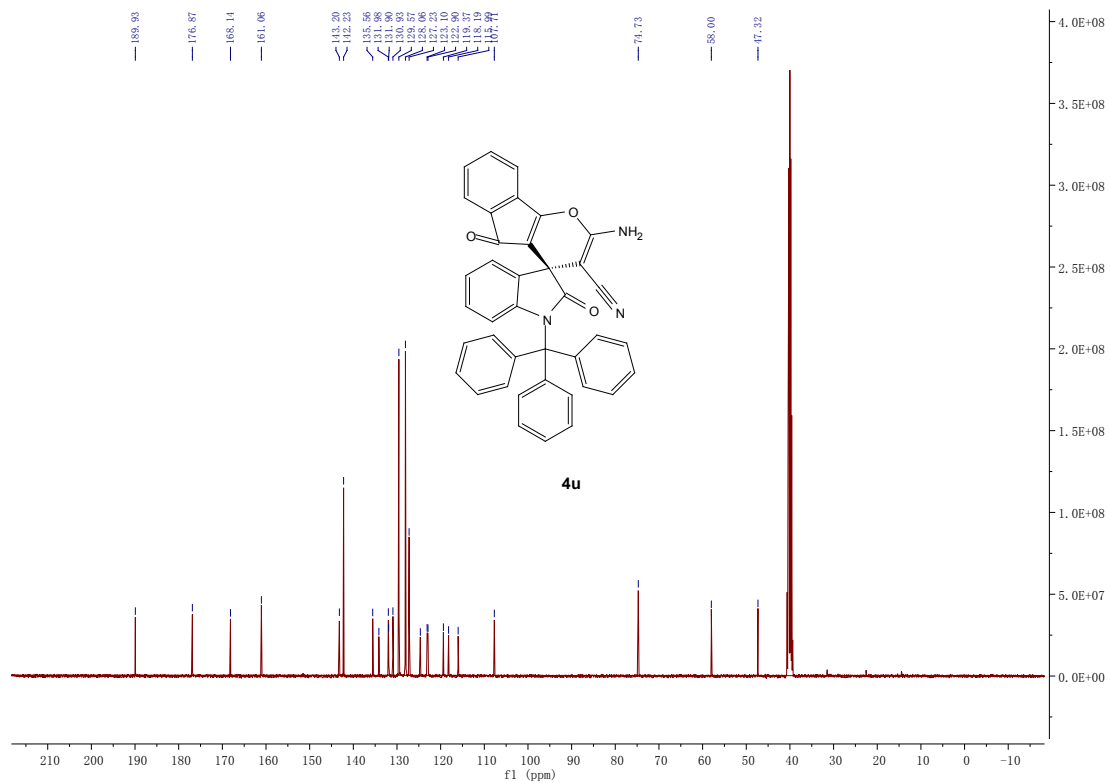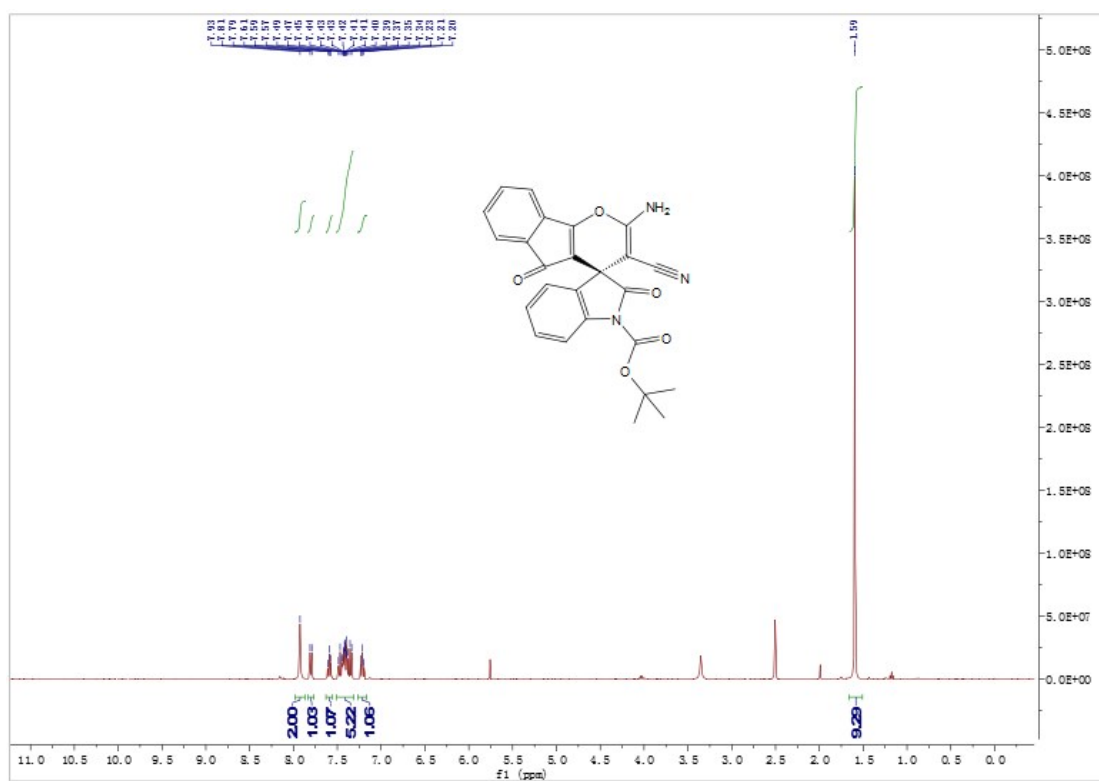

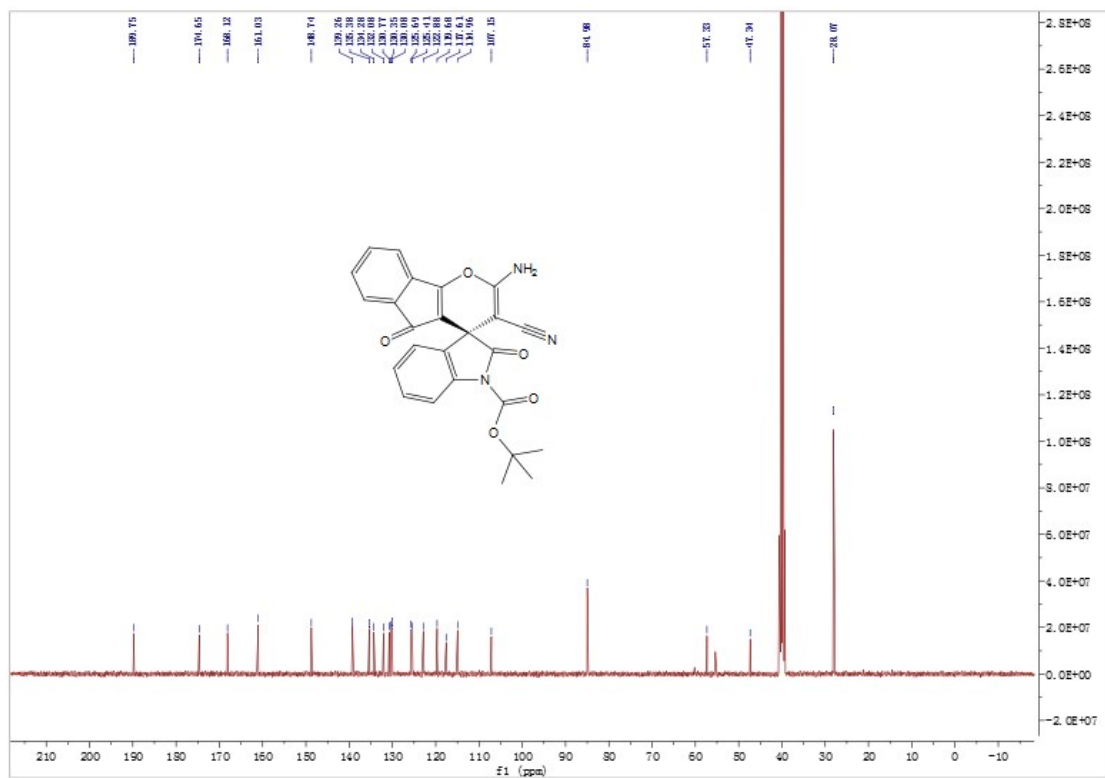

## 6. HPLC traces of compounds 4a-4u, 4o-1

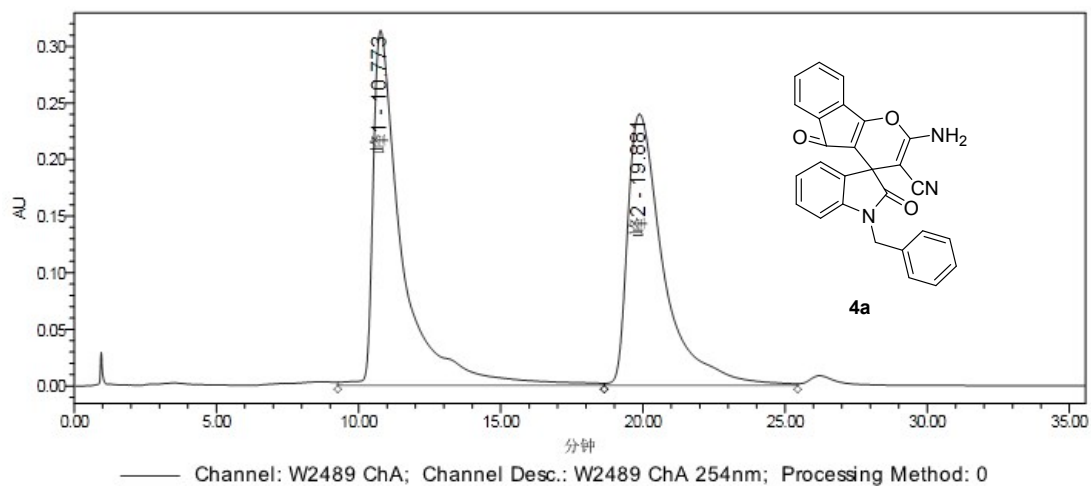

|   | Channel Description | Peak Name | RT (min) | Area (磷*sec) | % Area | Height (磷) |
|---|---------------------|-----------|----------|--------------|--------|------------|
| 1 | W2489 ChA 254nm     | 峰1        | 10.773   | 22245436     | 51.36  | 313401     |
| 2 | W2489 ChA 254nm     | 峰2        | 19.881   | 21063149     | 48.64  | 239706     |

remark: 峰→Peak  
分钟→time(min)  
磷→mAU



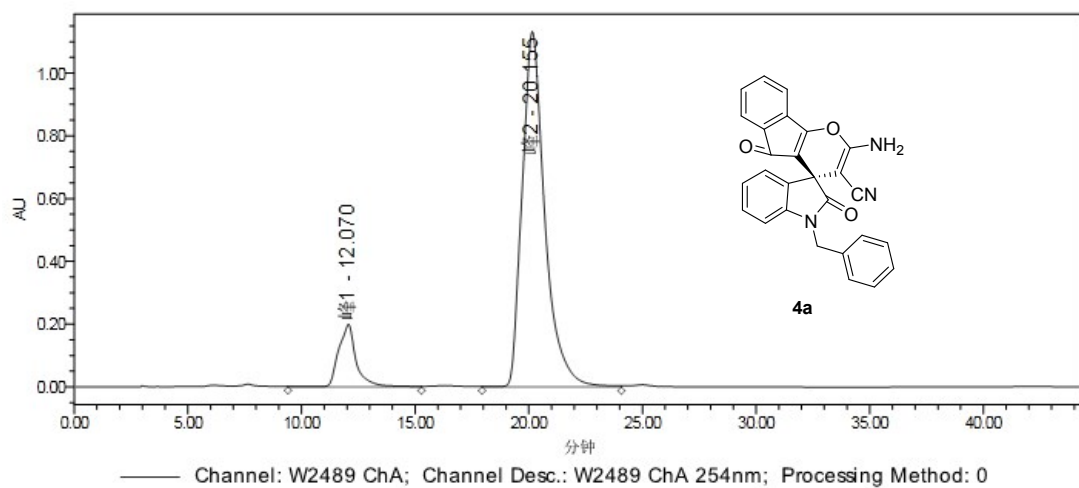

|   | Channel Description | Peak Name | RT (min) | Area (磷*sec) | % Area | Height (磷) |
|---|---------------------|-----------|----------|--------------|--------|------------|
| 1 | W2489 ChA 254nm     | 峰1        | 12.070   | 10588812     | 11.92  | 198429     |
| 2 | W2489 ChA 254nm     | 峰2        | 20.155   | 78224476     | 88.08  | 1131232    |

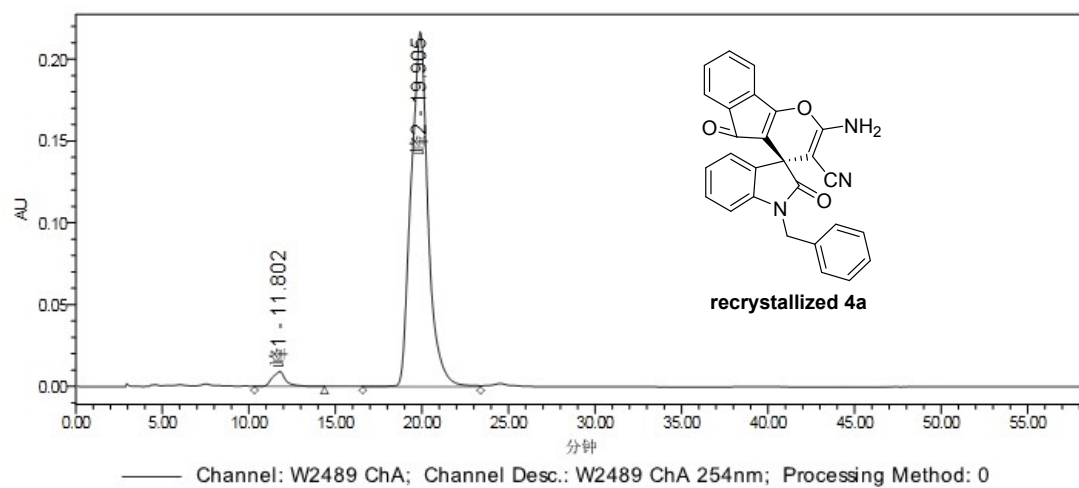

|   | Channel Description | Peak Name | RT (min) | Area (磷*sec) | % Area | Height (磷) |
|---|---------------------|-----------|----------|--------------|--------|------------|
| 1 | W2489 ChA 254nm     | 峰1        | 11.802   | 473776       | 3.11   | 9007       |
| 2 | W2489 ChA 254nm     | 峰2        | 19.905   | 14759605     | 96.89  | 216489     |

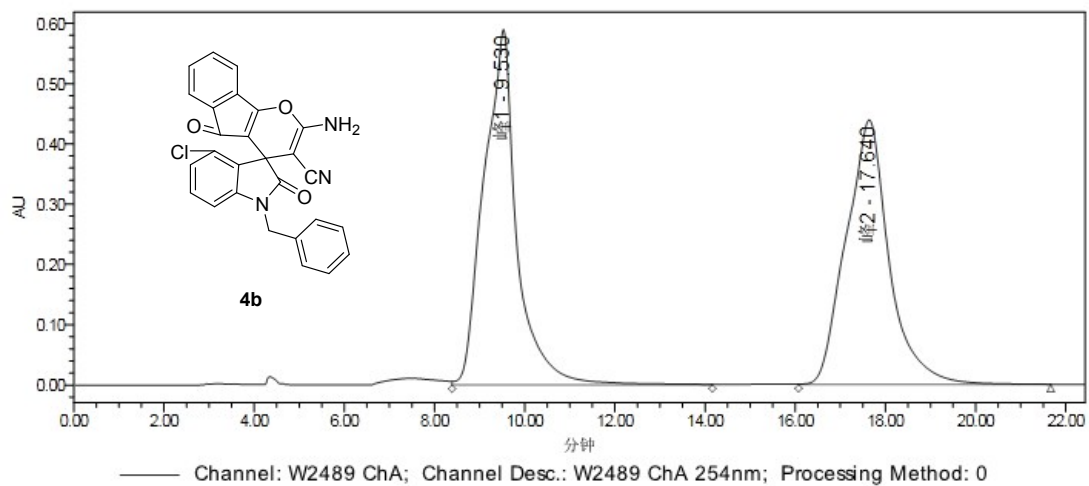

|   | Channel Description | Peak Name | RT (min) | Area (峰*sec) | % Area | Height (峰) |
|---|---------------------|-----------|----------|--------------|--------|------------|
| 1 | W2489 ChA 254nm     | 峰1        | 9.530    | 29902180     | 50.67  | 588853     |
| 2 | W2489 ChA 254nm     | 峰2        | 17.640   | 29114383     | 49.33  | 438640     |

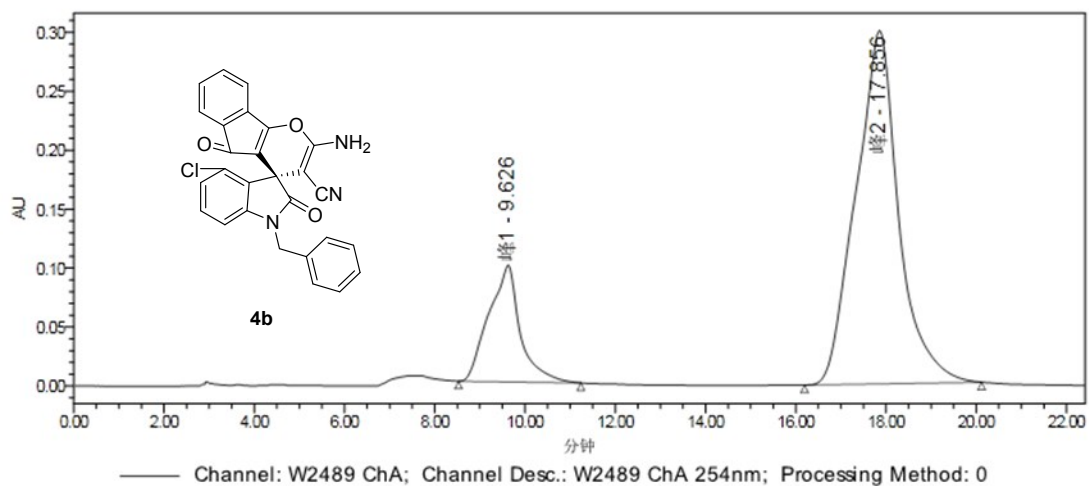

|   | Channel Description | Peak Name | RT (min) | Area (峰*sec) | % Area | Height (峰) |
|---|---------------------|-----------|----------|--------------|--------|------------|
| 1 | W2489 ChA 254nm     | 峰1        | 9.626    | 4794168      | 19.54  | 98831      |
| 2 | W2489 ChA 254nm     | 峰2        | 17.856   | 19740517     | 80.46  | 299369     |

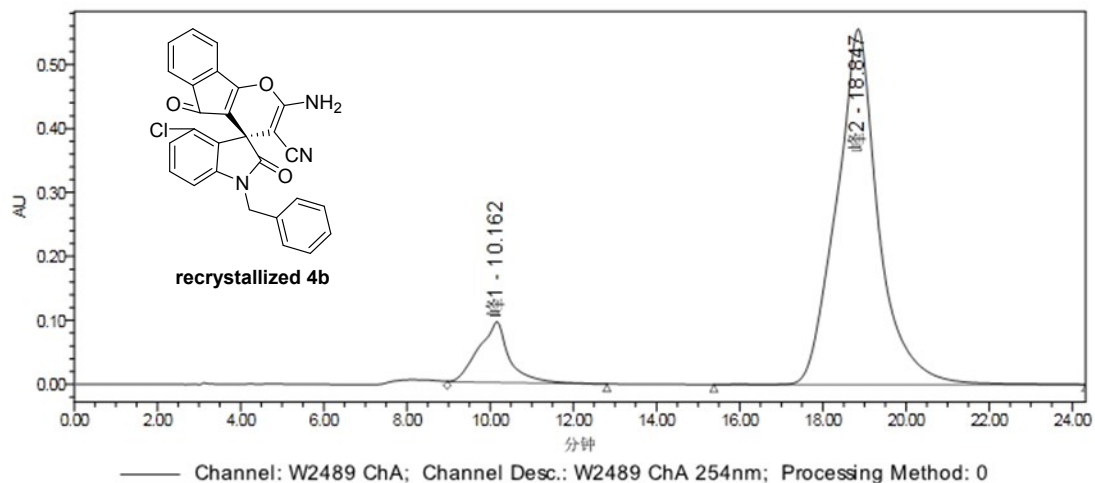

|   | Channel Description | Peak Name | RT (min) | Area (峰*sec) | % Area | Height (峰) |
|---|---------------------|-----------|----------|--------------|--------|------------|
| 1 | W2489 ChA 254nm     | 峰1        | 10.162   | 4845339      | 11.09  | 94571      |
| 2 | W2489 ChA 254nm     | 峰2        | 18.847   | 38840847     | 88.91  | 555441     |

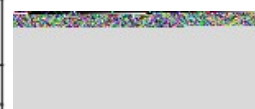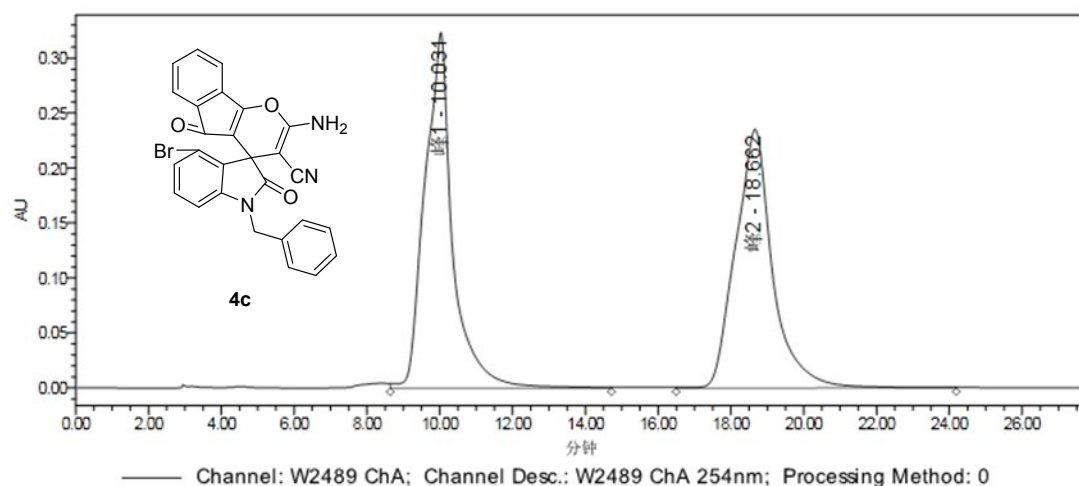

|   | Channel Description | Peak Name | RT (min) | Area (峰*sec) | % Area | Height (峰) |
|---|---------------------|-----------|----------|--------------|--------|------------|
| 1 | W2489 ChA 254nm     | 峰1        | 10.031   | 17140167     | 50.75  | 323197     |
| 2 | W2489 ChA 254nm     | 峰2        | 18.662   | 16636876     | 49.25  | 235185     |

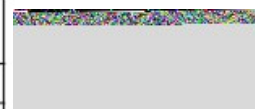

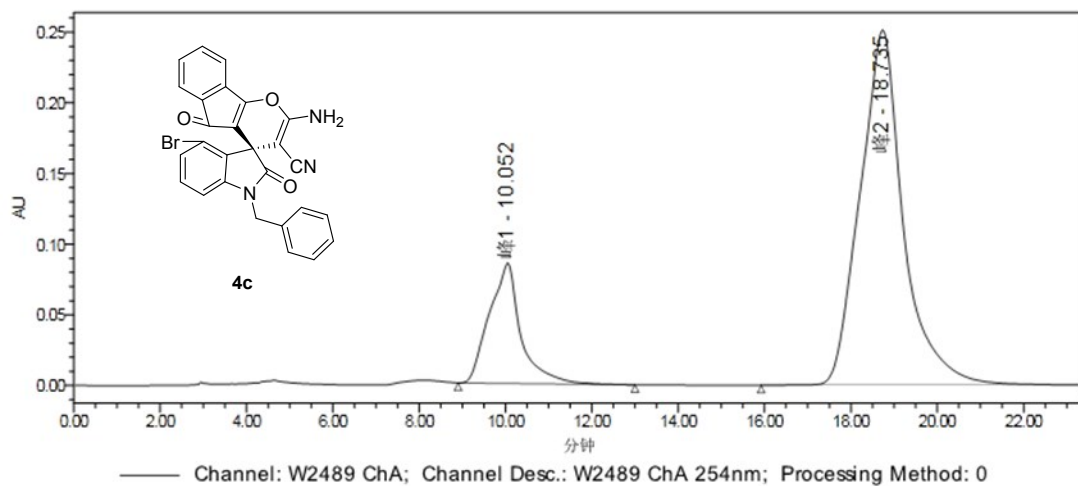

|   | Channel Description | Peak Name | RT (min) | Area (面积*sec) | % Area | Height (峰) |
|---|---------------------|-----------|----------|---------------|--------|------------|
| 1 | W2489 ChA 254nm     | 峰1        | 10.052   | 4320070       | 19.79  | 85060      |
| 2 | W2489 ChA 254nm     | 峰2        | 18.735   | 17511677      | 80.21  | 251231     |

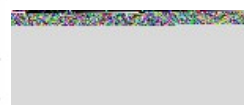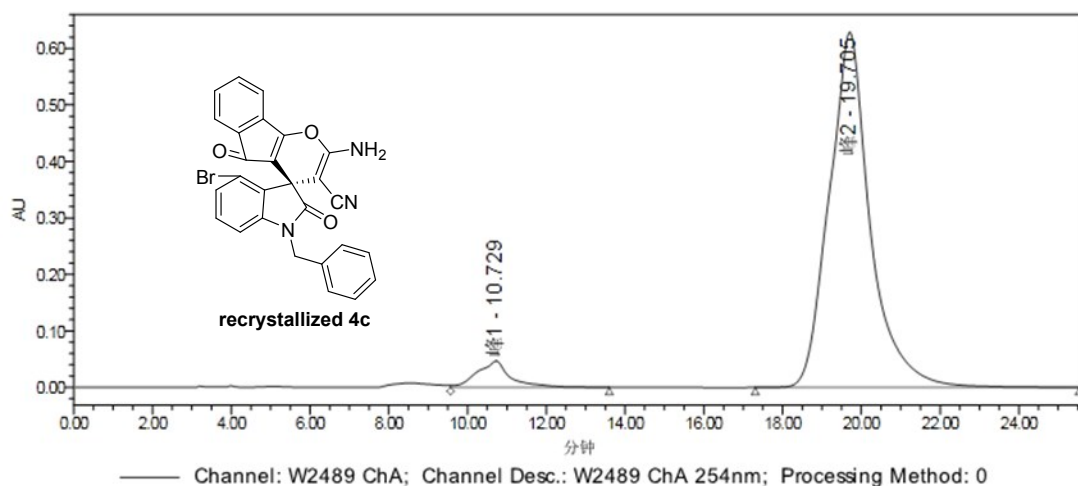

|   | Channel Description | Peak Name | RT (min) | Area (面积*sec) | % Area | Height (峰) |
|---|---------------------|-----------|----------|---------------|--------|------------|
| 1 | W2489 ChA 254nm     | 峰1        | 10.729   | 2732516       | 5.66   | 46886      |
| 2 | W2489 ChA 254nm     | 峰2        | 19.705   | 45519870      | 94.34  | 628809     |

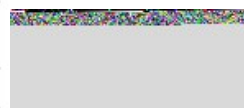

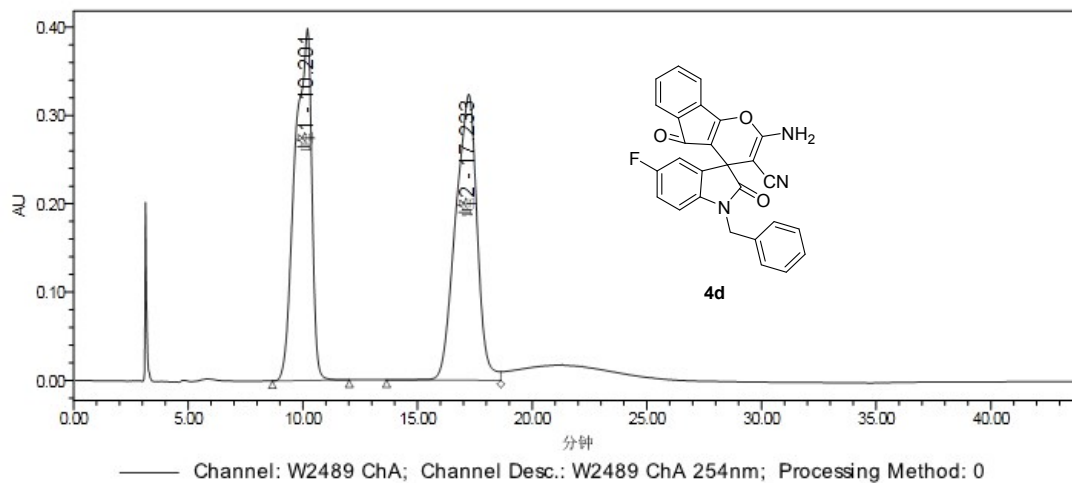

|   | Channel Description | Peak Name | RT (min) | Area (磷*sec) | % Area | Height (磷) |
|---|---------------------|-----------|----------|--------------|--------|------------|
| 1 | W2489 ChA 254nm     | 峰1        | 10.201   | 20167573     | 48.81  | 398356     |
| 2 | W2489 ChA 254nm     | 峰2        | 17.233   | 21150002     | 51.19  | 323723     |

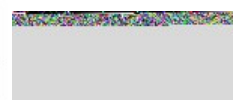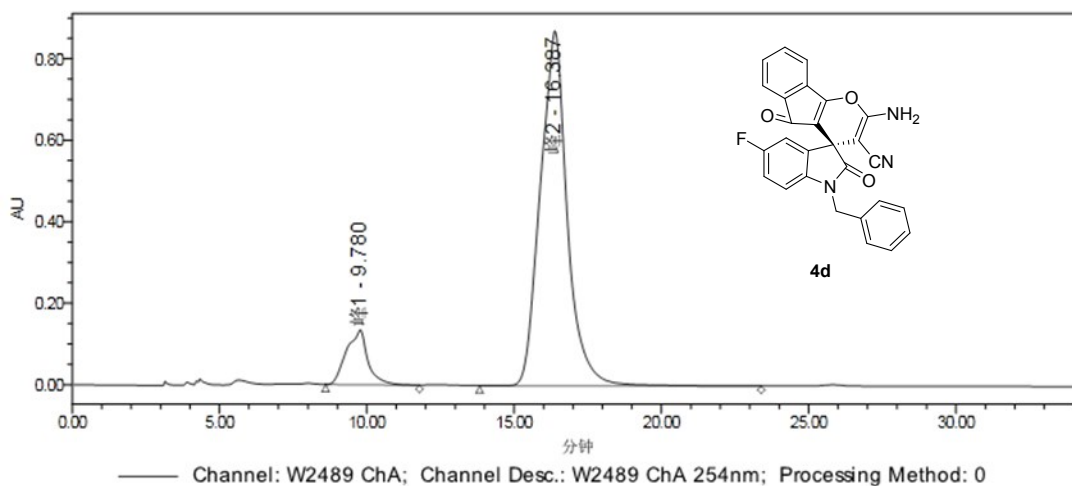

|   | Channel Description | Peak Name | RT (min) | Area (磷*sec) | % Area | Height (磷) |
|---|---------------------|-----------|----------|--------------|--------|------------|
| 1 | W2489 ChA 254nm     | 峰1        | 9.780    | 6827208      | 10.99  | 134019     |
| 2 | W2489 ChA 254nm     | 峰2        | 16.387   | 55284752     | 89.01  | 870067     |

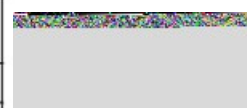

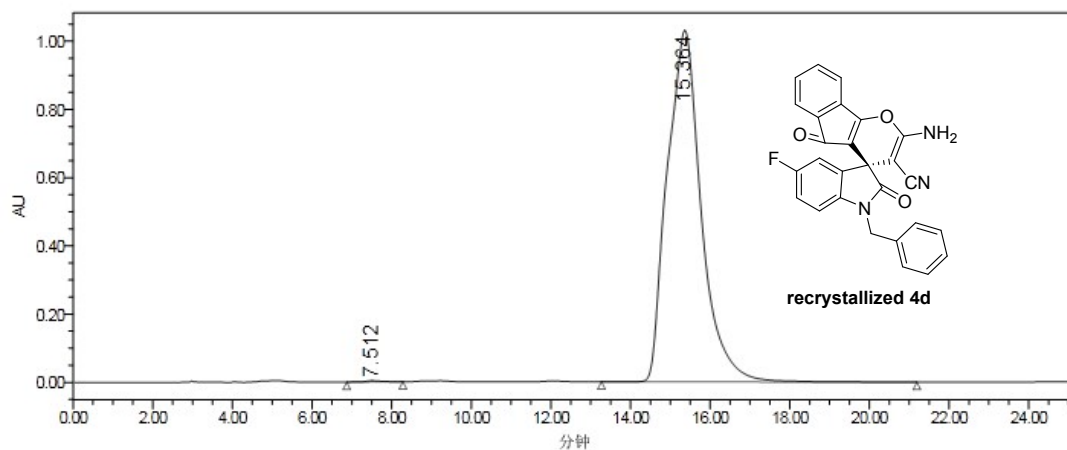

Channel: W2489 ChA; Channel Desc.: W2489 ChA 254nm; Processing Method: 0

|   | Channel Description | RT (min) | Area (磺*sec) | % Area | Height (磺) |
|---|---------------------|----------|--------------|--------|------------|
| 1 | W2489 ChA 254nm     | 7.512    | 89265        | 0.15   | 3333       |
| 2 | W2489 ChA 254nm     | 15.364   | 6111606E     | 99.85  | 1030271    |

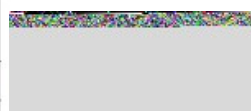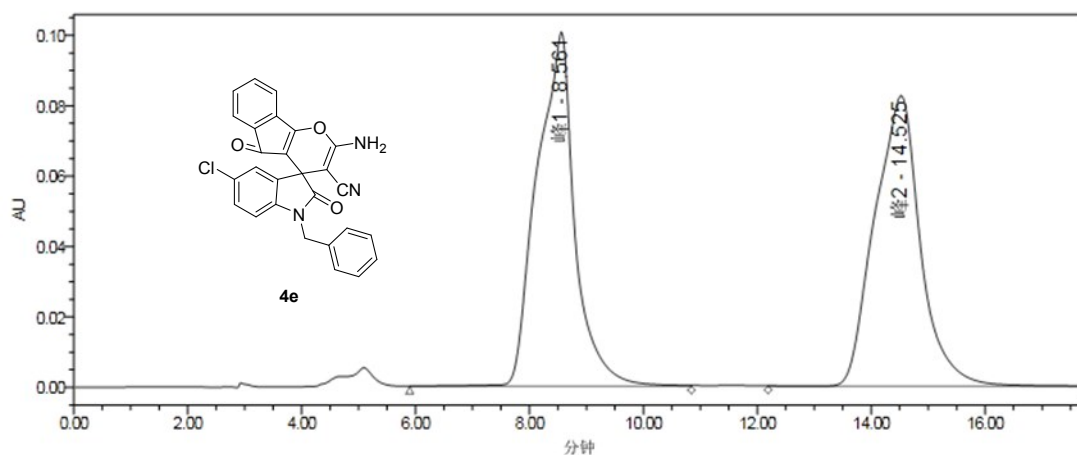

Channel: W2489 ChA; Channel Desc.: W2489 ChA 254nm; Processing Method: 0

|   | Channel Description | Peak Name | RT (min) | Area (磺*sec) | % Area | Height (磺) |
|---|---------------------|-----------|----------|--------------|--------|------------|
| 1 | W2489 ChA 254nm     | 峰1        | 8.561    | 4655373      | 50.25  | 100590     |
| 2 | W2489 ChA 254nm     | 峰2        | 14.525   | 4608586      | 49.75  | 82499      |

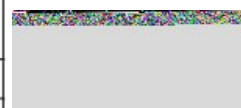

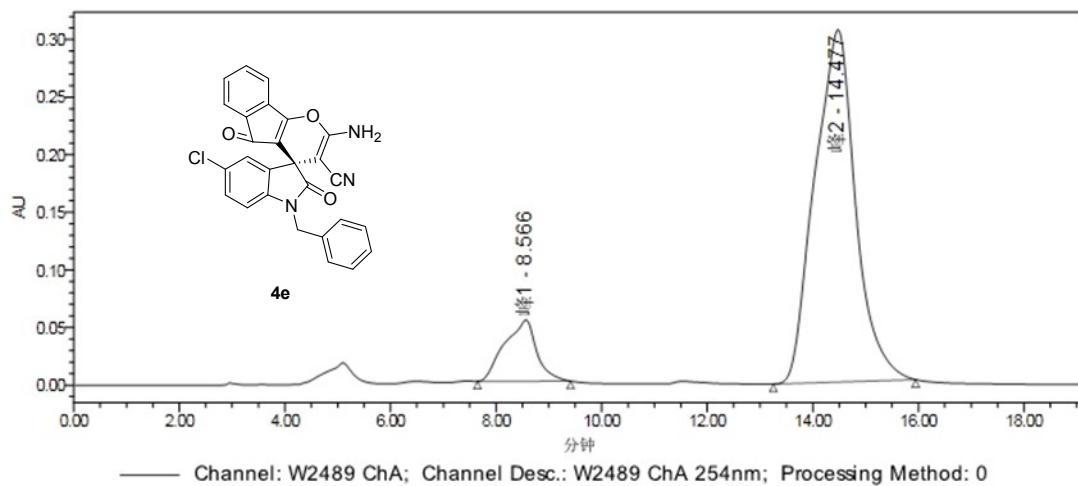

|   | Channel Description | Peak Name | RT (min) | Area (峰*sec) | % Area | Height (峰) |
|---|---------------------|-----------|----------|--------------|--------|------------|
| 1 | W2489 ChA 254nm     | 峰1        | 8.566    | 2245919      | 12.03  | 53147      |
| 2 | W2489 ChA 254nm     | 峰2        | 14.477   | 16426376     | 87.97  | 305839     |

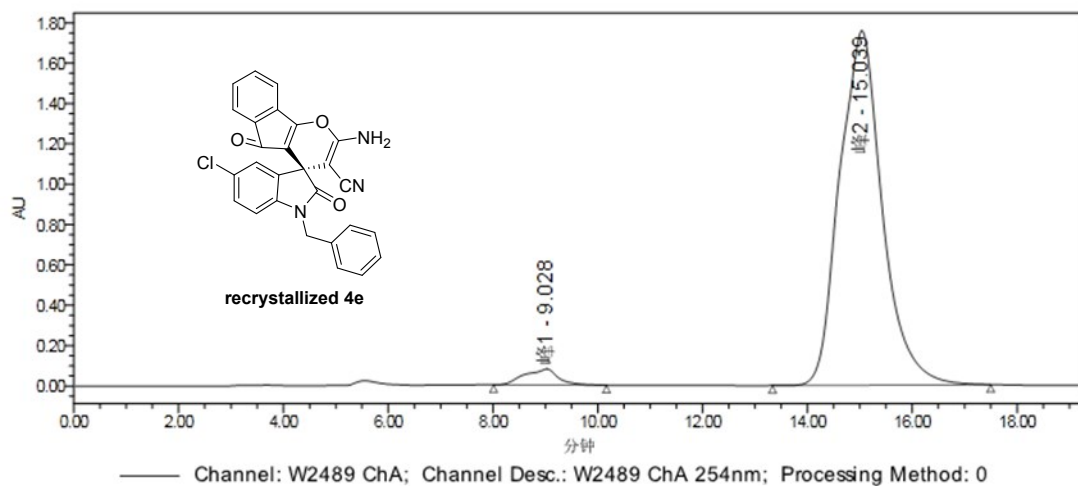

|   | Channel Description | Peak Name | RT (min) | Area (峰*sec) | % Area | Height (峰) |
|---|---------------------|-----------|----------|--------------|--------|------------|
| 1 | W2489 ChA 254nm     | 峰1        | 9.028    | 3542185      | 3.44   | 79492      |
| 2 | W2489 ChA 254nm     | 峰2        | 15.039   | 99428755     | 96.56  | 1757052    |

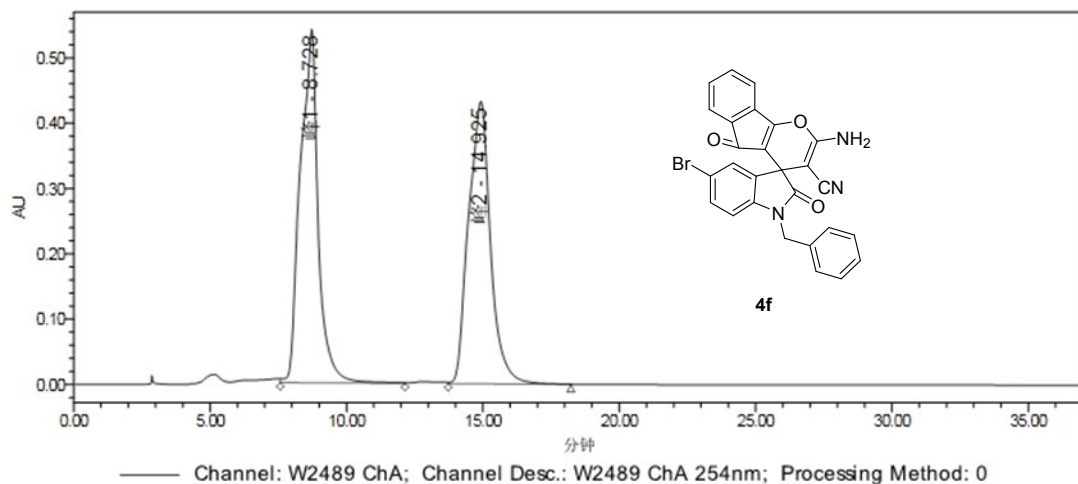

|   | Channel Description | Peak Name | RT (min) | Area (峰*sec) | % Area | Height (峰) |
|---|---------------------|-----------|----------|--------------|--------|------------|
| 1 | W2489 ChA 254nm     | 峰1        | 8.728    | 24637788     | 50.51  | 540216     |
| 2 | W2489 ChA 254nm     | 峰2        | 14.925   | 24143264     | 49.49  | 432288     |

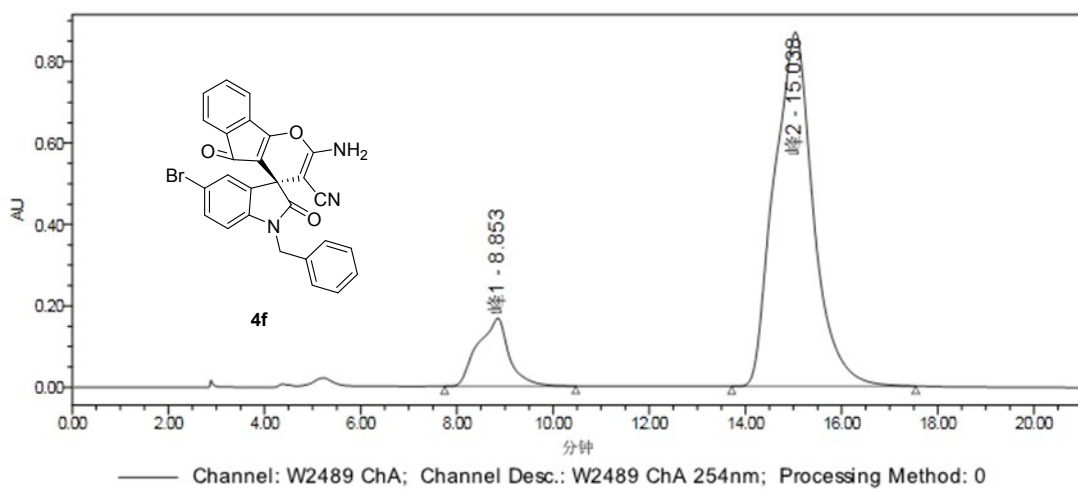

|   | Channel Description | Peak Name | RT (min) | Area (峰*sec) | % Area | Height (峰) |
|---|---------------------|-----------|----------|--------------|--------|------------|
| 1 | W2489 ChA 254nm     | 峰1        | 8.853    | 7552481      | 13.31  | 167138     |
| 2 | W2489 ChA 254nm     | 峰2        | 15.038   | 49183619     | 86.69  | 869499     |



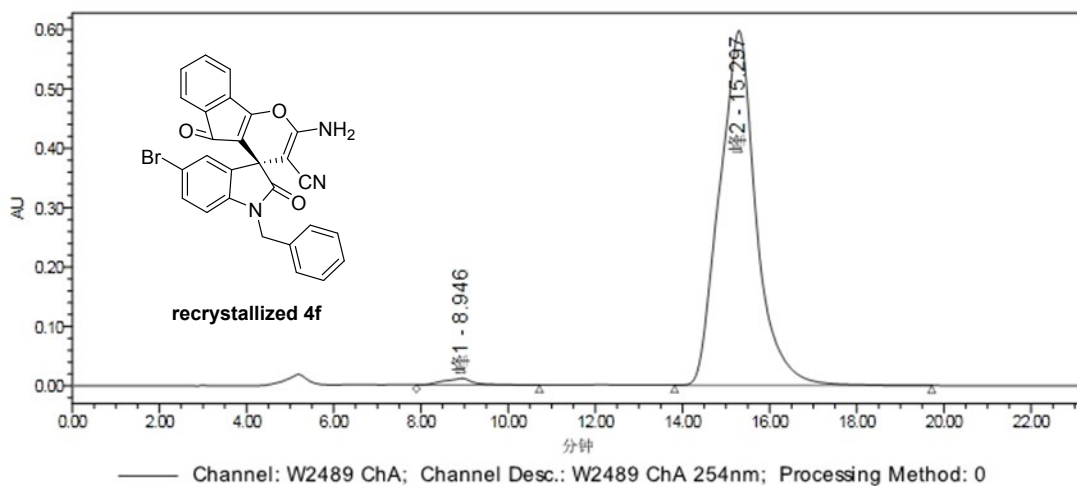

|   | Channel Description | Peak Name | RT (min) | Area (AU*sec) | % Area | Height (AU) |
|---|---------------------|-----------|----------|---------------|--------|-------------|
| 1 | W2489 ChA 254nm     | 峰1        | 8.946    | 527142        | 1.50   | 11341       |
| 2 | W2489 ChA 254nm     | 峰2        | 15.297   | 34642920      | 98.50  | 596901      |

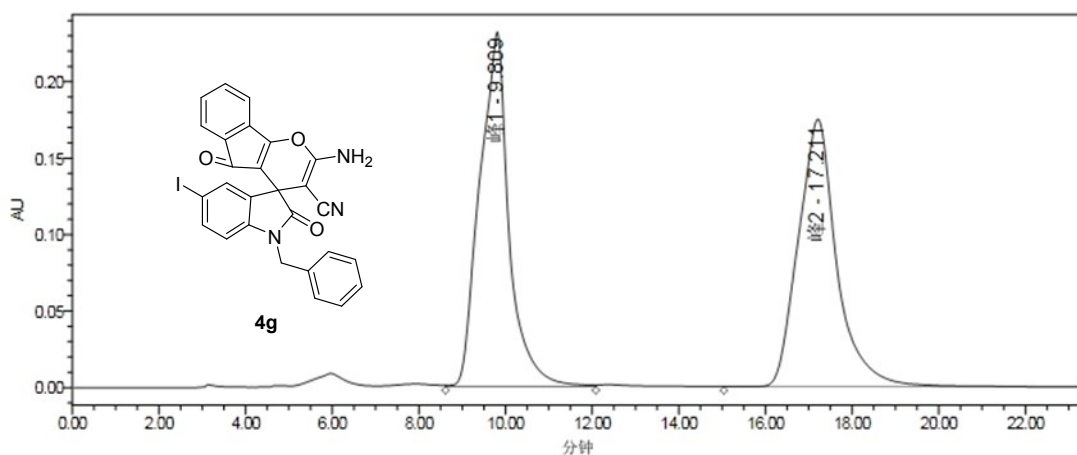

|   | Channel Description | Peak Name | RT (min) | Area (AU*sec) | % Area | Height (AU) |
|---|---------------------|-----------|----------|---------------|--------|-------------|
| 1 | W2489 ChA 254nm     | 峰1        | 9.809    | 10878117      | 50.12  | 231694      |
| 2 | W2489 ChA 254nm     | 峰2        | 17.211   | 10826489      | 49.88  | 174968      |

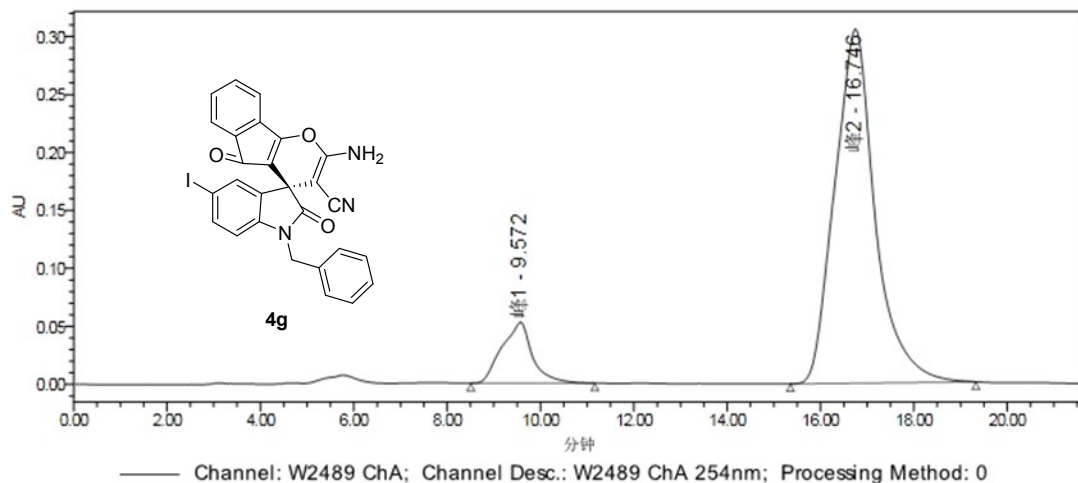

|   | Channel Description | Peak Name | RT (min) | Area (峰*sec) | % Area | Height (峰) |
|---|---------------------|-----------|----------|--------------|--------|------------|
| 1 | W2489 ChA 254nm     | 峰1        | 9.572    | 2393569      | 11.54  | 52599      |
| 2 | W2489 ChA 254nm     | 峰2        | 16.746   | 18343850     | 88.46  | 305212     |

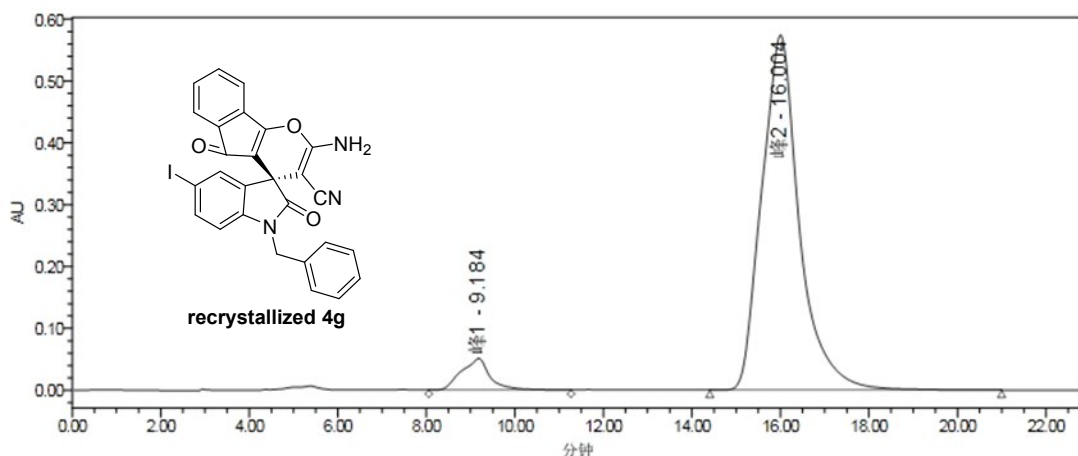

|   | Channel Description | Peak Name | RT (min) | Area (峰*sec) | % Area | Height (峰) |
|---|---------------------|-----------|----------|--------------|--------|------------|
| 1 | W2489 ChA 254nm     | 峰1        | 9.184    | 2301821      | 6.37   | 51099      |
| 2 | W2489 ChA 254nm     | 峰2        | 16.004   | 33818398     | 93.63  | 573780     |

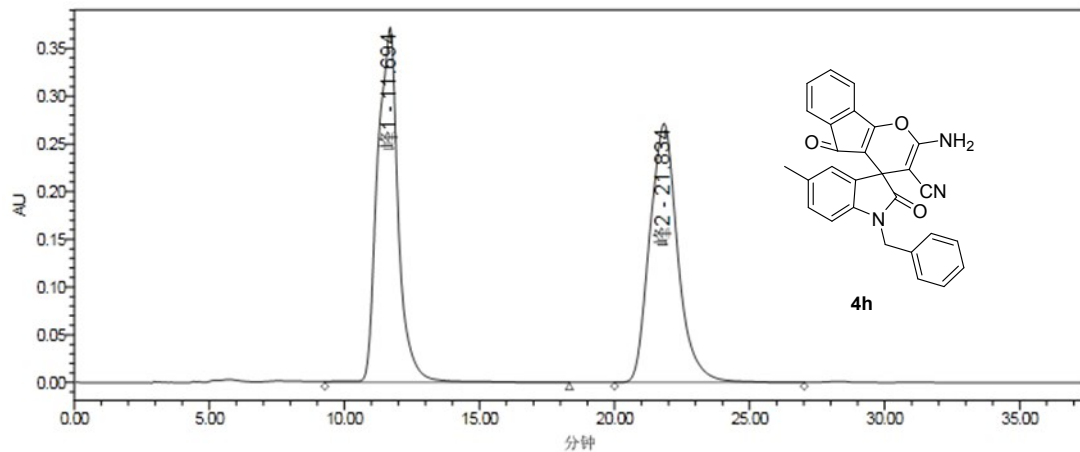

Channel: W2489 ChA; Channel Desc.: W2489 ChA 254nm; Processing Method: 0

|   | Channel Description | Peak Name | RT (min) | Area (峰*sec) | % Area | Height (峰) |
|---|---------------------|-----------|----------|--------------|--------|------------|
| 1 | W2489 ChA 254nm     | 峰1        | 11.694   | 19858123     | 50.35  | 371616     |
| 2 | W2489 ChA 254nm     | 峰2        | 21.834   | 19579514     | 49.65  | 271071     |

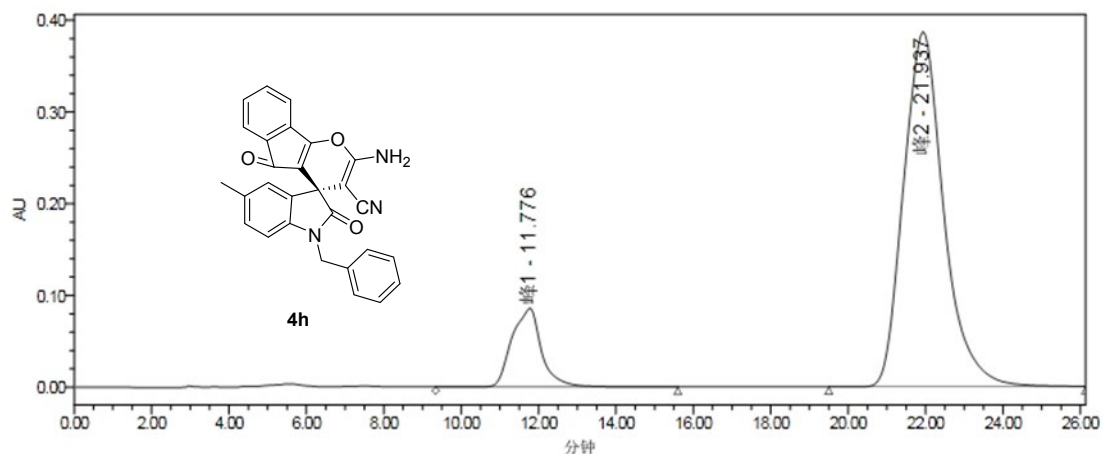

Channel: W2489 ChA; Channel Desc.: W2489 ChA 254nm; Processing Method: 0

|   | Channel Description | Peak Name | RT (min) | Area (峰*sec) | % Area | Height (峰) |
|---|---------------------|-----------|----------|--------------|--------|------------|
| 1 | W2489 ChA 254nm     | 峰1        | 11.776   | 4538717      | 13.99  | 85526      |
| 2 | W2489 ChA 254nm     | 峰2        | 21.937   | 27903545     | 86.01  | 386566     |

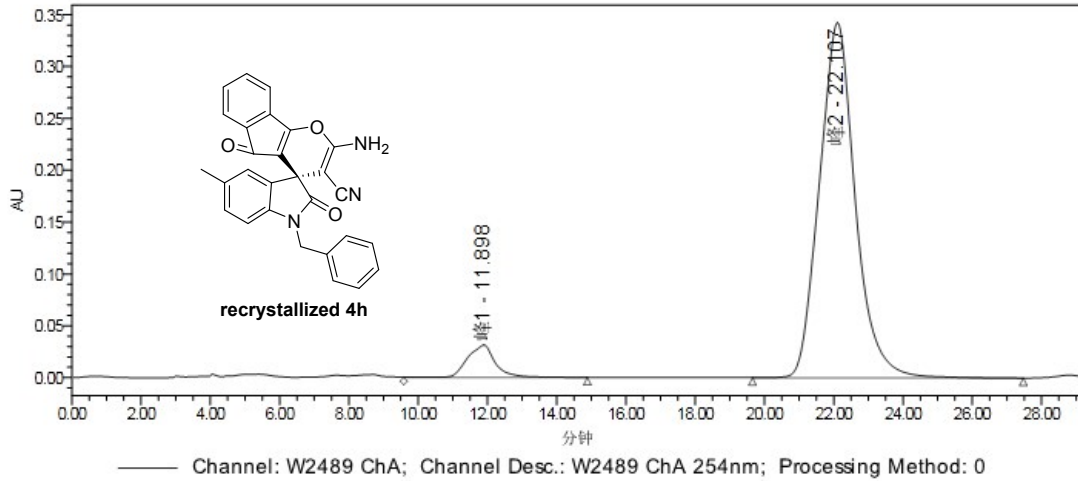

|   | Channel Description | Peak Name | RT (min) | Area (峰*sec) | % Area | Height (峰) |
|---|---------------------|-----------|----------|--------------|--------|------------|
| 1 | W2489 ChA 254nm     | 峰1        | 11.898   | 1733877      | 6.57   | 31242      |
| 2 | W2489 ChA 254nm     | 峰2        | 22.107   | 24645604     | 93.43  | 342326     |

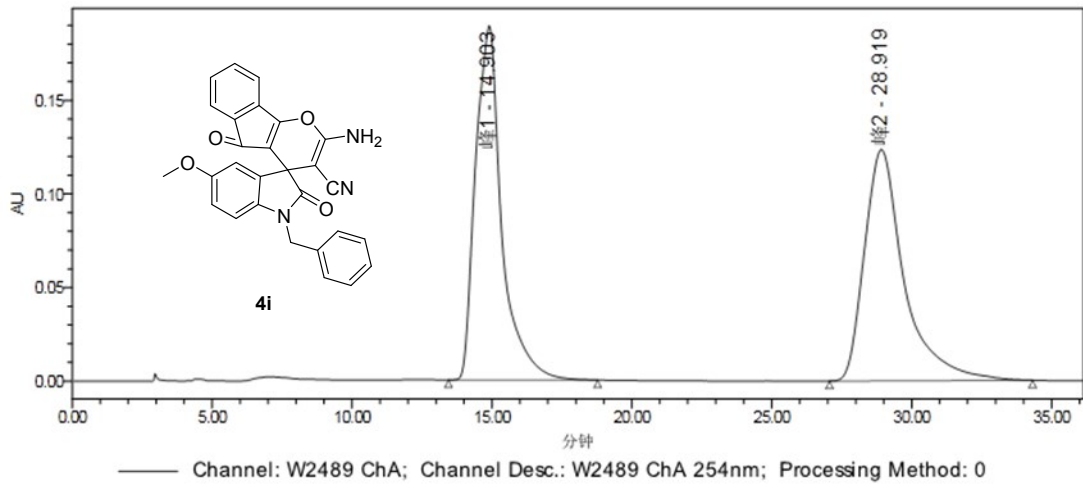

|   | Channel Description | Peak Name | RT (min) | Area (峰*sec) | % Area | Height (峰) |
|---|---------------------|-----------|----------|--------------|--------|------------|
| 1 | W2489 ChA 254nm     | 峰1        | 14.903   | 12295599     | 50.25  | 188983     |
| 2 | W2489 ChA 254nm     | 峰2        | 28.919   | 12174058     | 49.75  | 123500     |

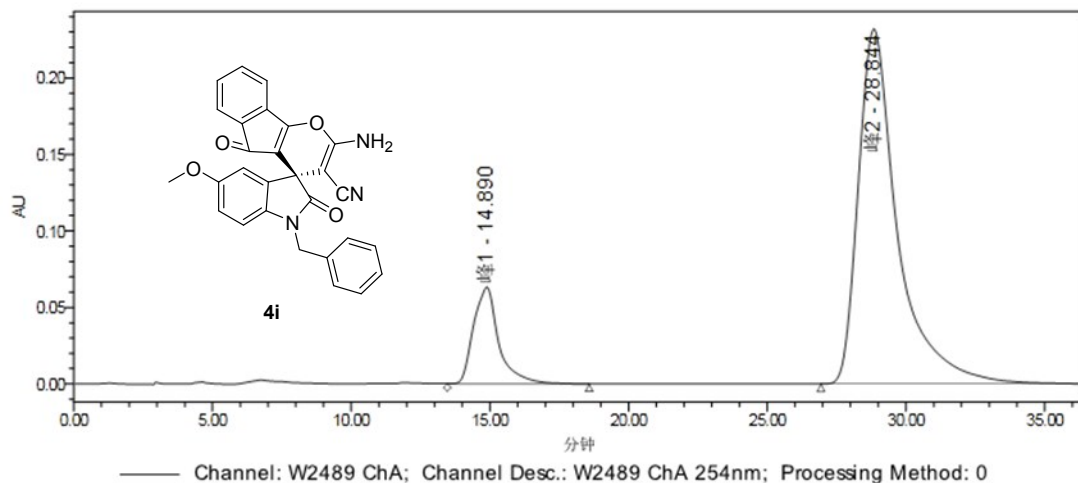

|   | Channel Description | Peak Name | RT (min) | Area (磺*sec) | % Area | Height (磺) |
|---|---------------------|-----------|----------|--------------|--------|------------|
| 1 | W2489 ChA 254nm     | 峰1        | 14.890   | 3981506      | 14.85  | 63060      |
| 2 | W2489 ChA 254nm     | 峰2        | 28.844   | 22828033     | 85.15  | 231822     |

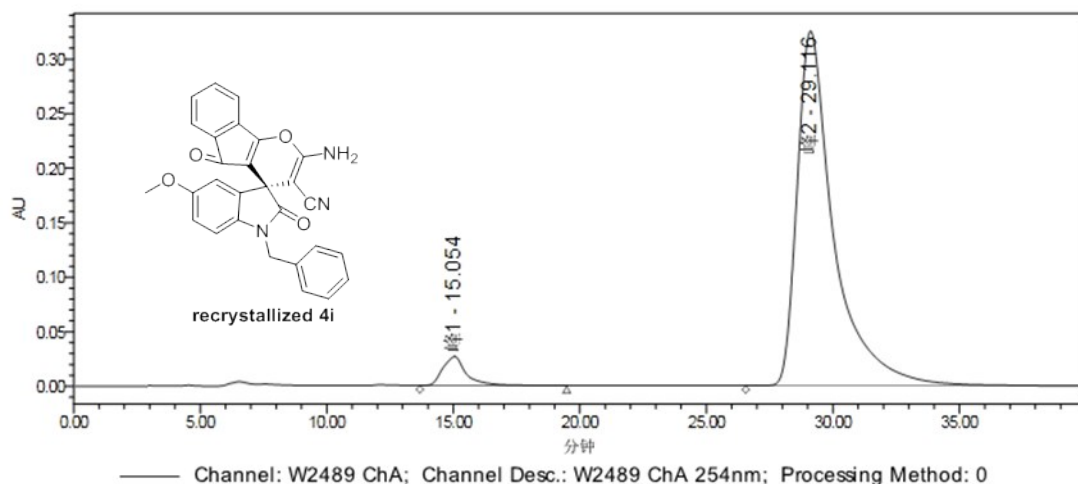

|   | Channel Description | Peak Name | RT (min) | Area (磺*sec) | % Area | Height (磺) |
|---|---------------------|-----------|----------|--------------|--------|------------|
| 1 | W2489 ChA 254nm     | 峰1        | 15.054   | 1710033      | 4.96   | 26698      |
| 2 | W2489 ChA 254nm     | 峰2        | 29.116   | 32749635     | 95.04  | 325099     |

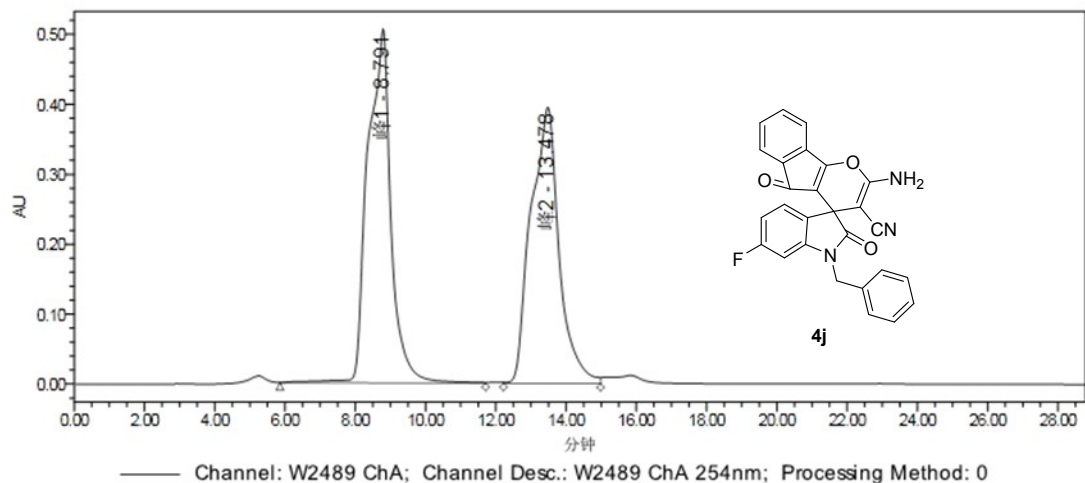

|   | Channel Description | Peak Name | RT (min) | Area (响*sec) | % Area | Height (响) |
|---|---------------------|-----------|----------|--------------|--------|------------|
| 1 | W2489 ChA 254nm     | 峰1        | 8.791    | 23319305     | 51.46  | 505711     |
| 2 | W2489 ChA 254nm     | 峰2        | 13.478   | 21992223     | 48.54  | 394643     |

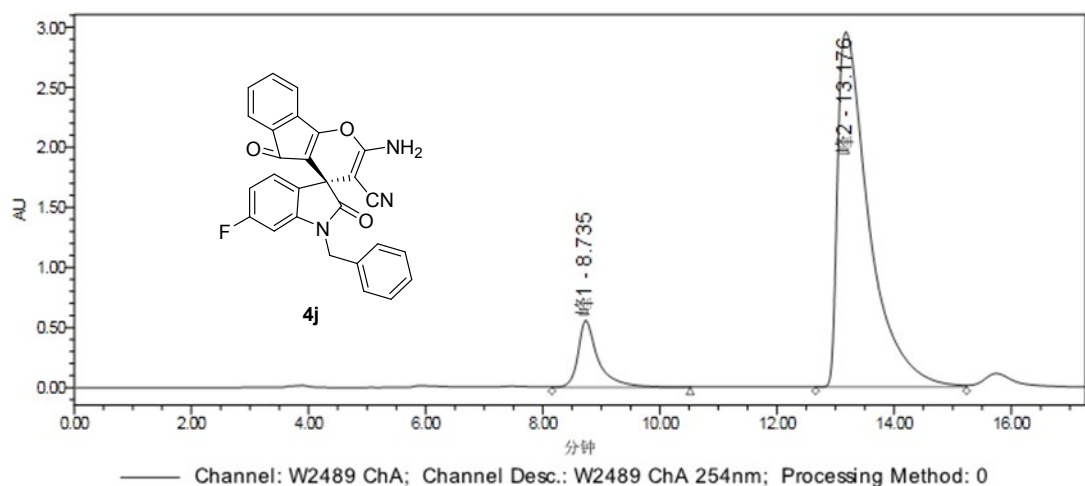

|   | Channel Description | Peak Name | RT (min) | Area (响*sec) | % Area | Height (响) |
|---|---------------------|-----------|----------|--------------|--------|------------|
| 1 | W2489 ChA 254nm     | 峰1        | 8.735    | 13222145     | 10.74  | 553649     |
| 2 | W2489 ChA 254nm     | 峰2        | 13.176   | 109879853    | 89.26  | 2953574    |

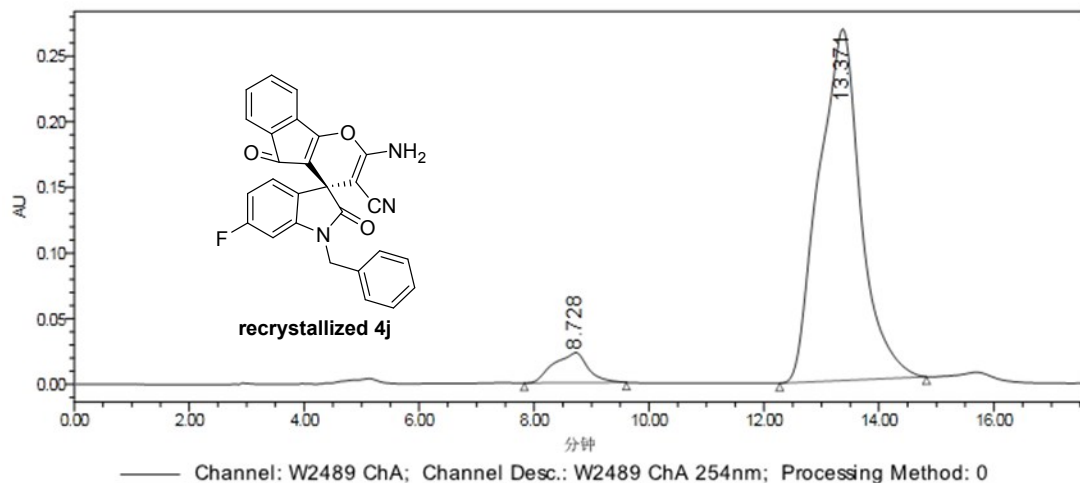

|   | Channel Description | RT (min) | Area (峰*sec) | % Area | Height (峰) |
|---|---------------------|----------|--------------|--------|------------|
| 1 | W2489 ChA 254nm     | 8.728    | 947700       | 6.55   | 22879      |
| 2 | W2489 ChA 254nm     | 13.371   | 13517745     | 93.45  | 267484     |

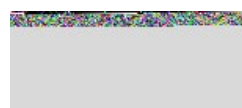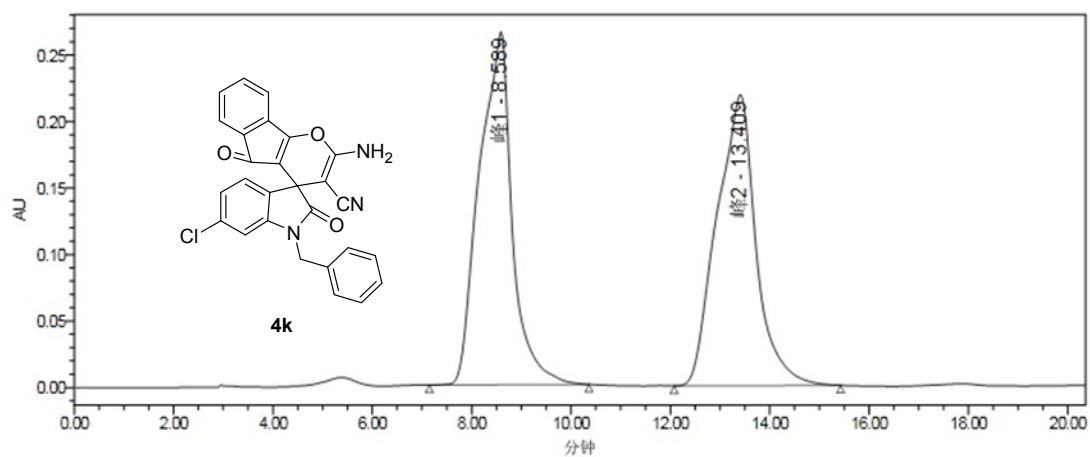

|   | Channel Description | Peak Name | RT (min) | Area (峰*sec) | % Area | Height (峰) |
|---|---------------------|-----------|----------|--------------|--------|------------|
| 1 | W2489 ChA 254nm     | 峰1        | 8.589    | 12162676     | 50.40  | 265029     |
| 2 | W2489 ChA 254nm     | 峰2        | 13.409   | 11971836     | 49.60  | 218598     |

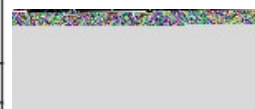

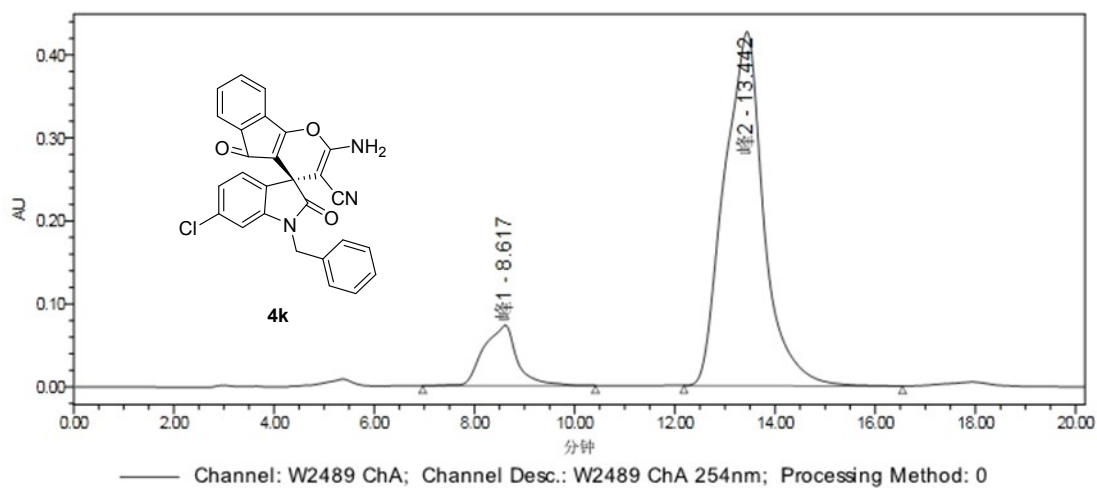

|   | Channel Description | Peak Name | RT (min) | Area (峰*sec) | % Area | Height (峰) |
|---|---------------------|-----------|----------|--------------|--------|------------|
| 1 | W2489 ChA 254nm     | 峰1        | 8.617    | 3372501      | 12.63  | 72834      |
| 2 | W2489 ChA 254nm     | 峰2        | 13.442   | 23339964     | 87.37  | 426426     |

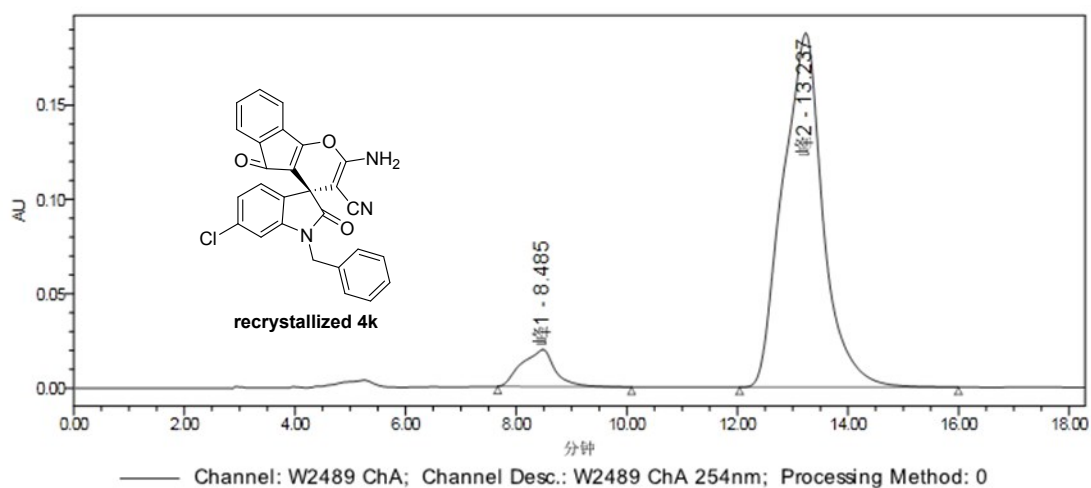

|   | Channel Description | Peak Name | RT (min) | Area (峰*sec) | % Area | Height (峰) |
|---|---------------------|-----------|----------|--------------|--------|------------|
| 1 | W2489 ChA 254nm     | 峰1        | 8.485    | 817844       | 7.94   | 19623      |
| 2 | W2489 ChA 254nm     | 峰2        | 13.237   | 9479336      | 92.06  | 187634     |



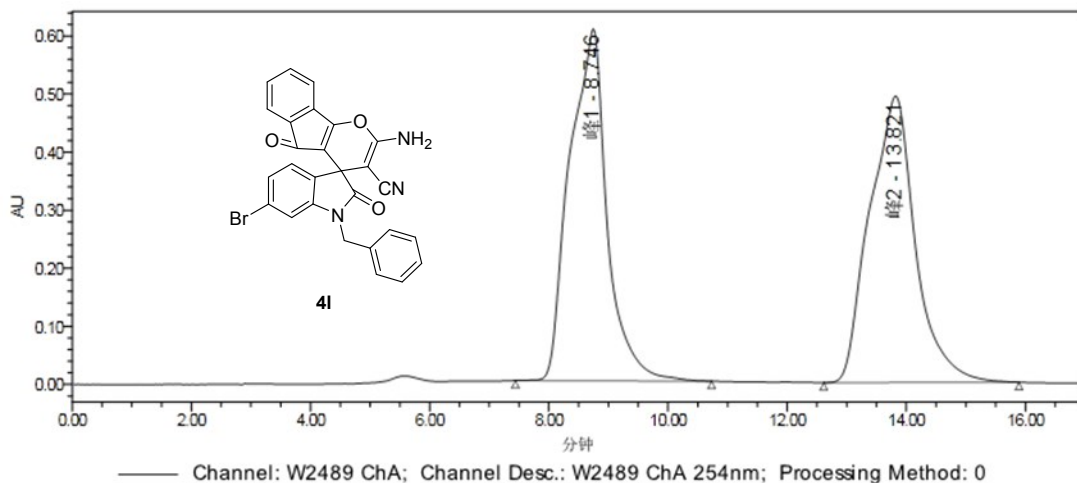

|   | Channel Description | Peak Name | RT (min) | Area (峰*sec) | % Area | Height (峰) |
|---|---------------------|-----------|----------|--------------|--------|------------|
| 1 | W2489 ChA 254nm     | 峰1        | 8.746    | 26444712     | 50.10  | 605518     |
| 2 | W2489 ChA 254nm     | 峰2        | 13.821   | 26337291     | 49.90  | 493153     |

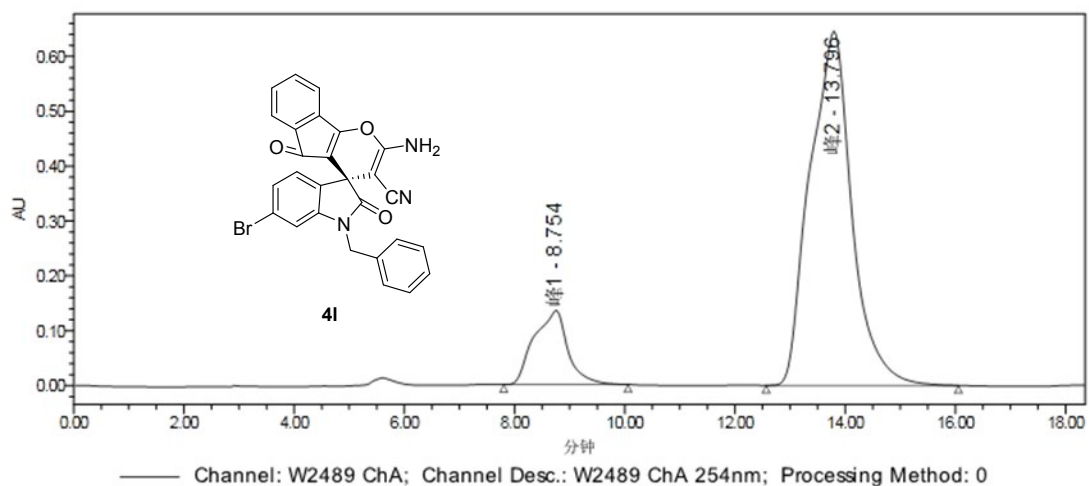

|   | Channel Description | Peak Name | RT (min) | Area (峰*sec) | % Area | Height (峰) |
|---|---------------------|-----------|----------|--------------|--------|------------|
| 1 | W2489 ChA 254nm     | 峰1        | 8.754    | 5733642      | 14.37  | 134702     |
| 2 | W2489 ChA 254nm     | 峰2        | 13.796   | 34158716     | 85.63  | 644653     |

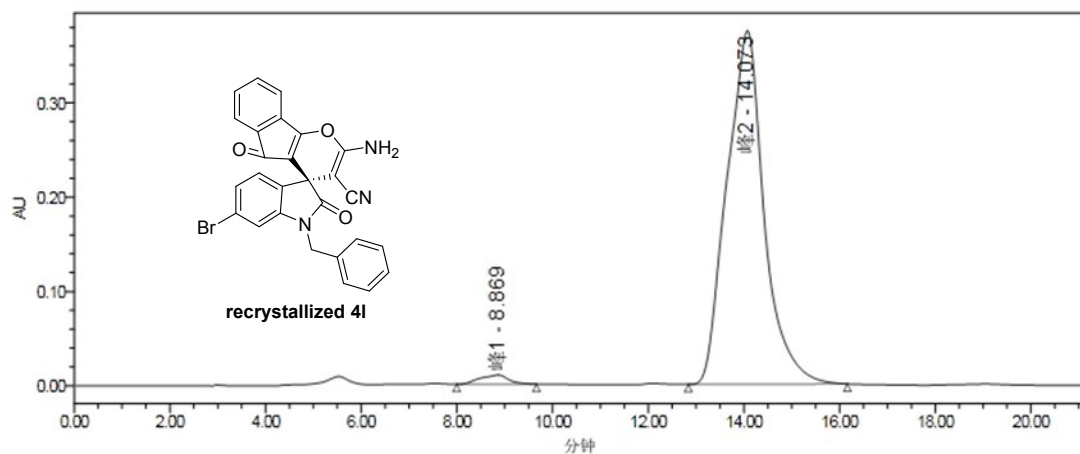

Channel: W2489 ChA; Channel Desc.: W2489 ChA 254nm; Processing Method: 0

|   | Channel Description | Peak Name | RT (min) | Area (AU*sec) | % Area | Height (AU) |
|---|---------------------|-----------|----------|---------------|--------|-------------|
| 1 | W2489 ChA 254nm     | 峰1        | 8.869    | 404916        | 1.96   | 9811        |
| 2 | W2489 ChA 254nm     | 峰2        | 14.073   | 20258546      | 98.04  | 374835      |

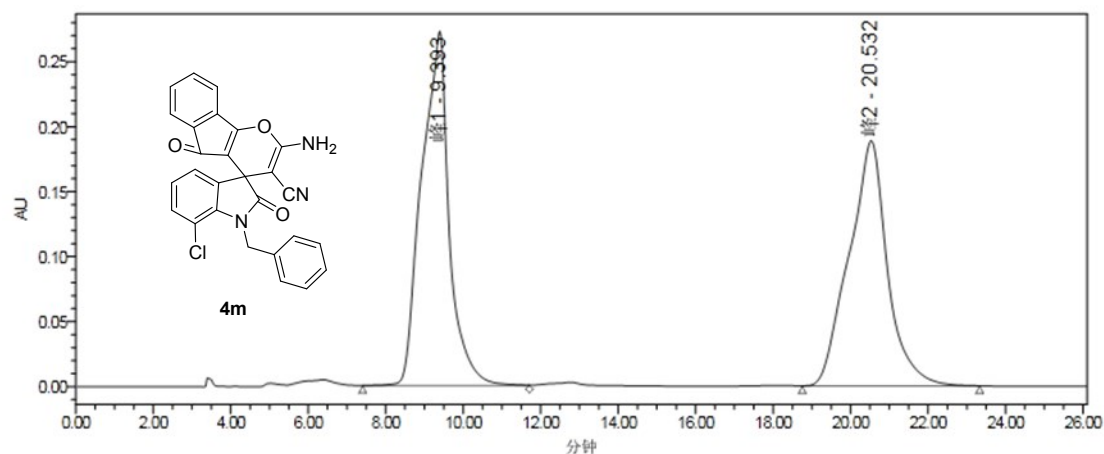

Channel: W2489 ChA; Channel Desc.: W2489 ChA 254nm; Processing Method: 0

|   | Channel Description | Peak Name | RT (min) | Area (AU*sec) | % Area | Height (AU) |
|---|---------------------|-----------|----------|---------------|--------|-------------|
| 1 | W2489 ChA 254nm     | 峰1        | 9.393    | 13460854      | 50.89  | 272318      |
| 2 | W2489 ChA 254nm     | 峰2        | 20.532   | 12988336      | 49.11  | 188528      |

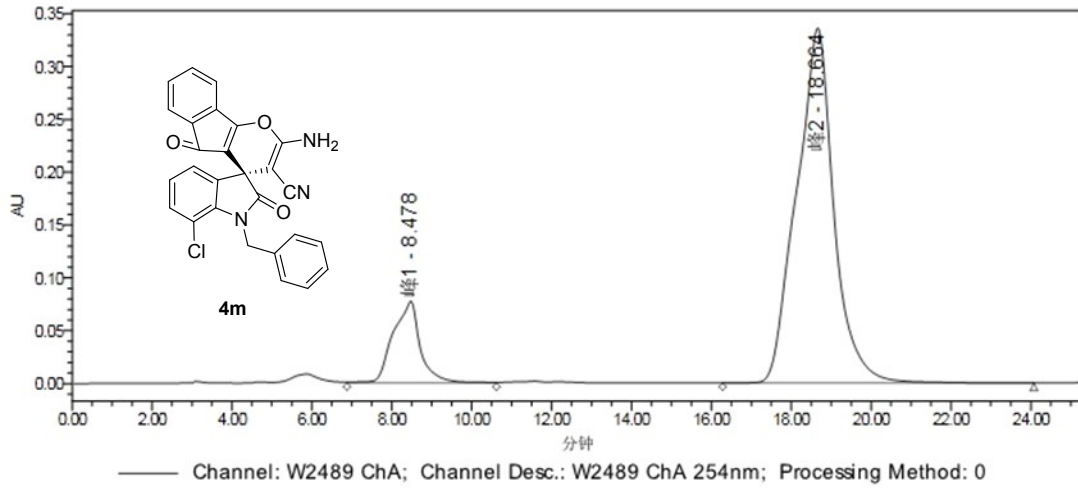

|   | Channel Description | Peak Name | RT (min) | Area (磺*sec) | % Area | Height (磺) |
|---|---------------------|-----------|----------|--------------|--------|------------|
| 1 | W2489 ChA 254nm     | 峰1        | 8.478    | 3656173      | 14.35  | 77136      |
| 2 | W2489 ChA 254nm     | 峰2        | 18.664   | 21817669     | 85.65  | 335764     |

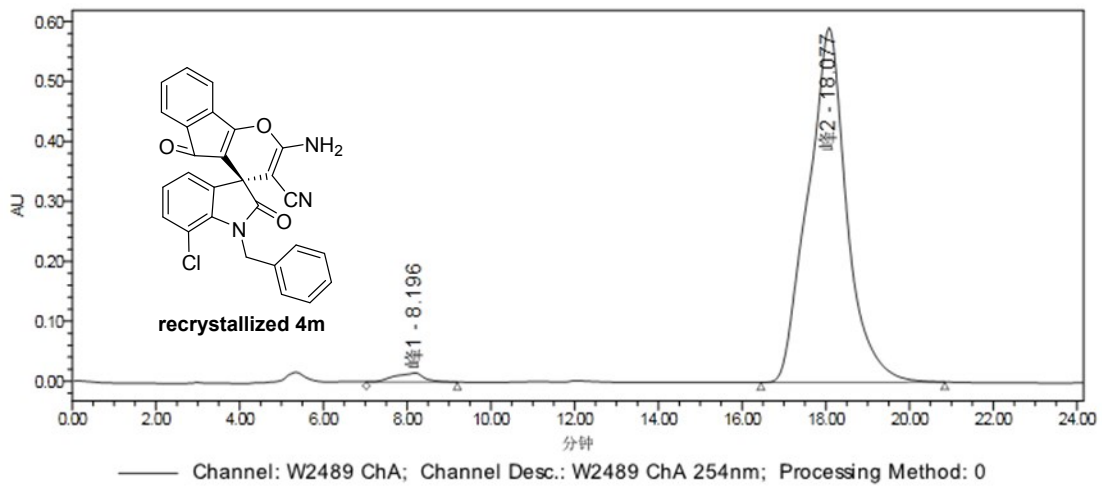

|   | Channel Description | Peak Name | RT (min) | Area (磺*sec) | % Area | Height (磺) |
|---|---------------------|-----------|----------|--------------|--------|------------|
| 1 | W2489 ChA 254nm     | 峰1        | 8.196    | 773717       | 2.00   | 15418      |
| 2 | W2489 ChA 254nm     | 峰2        | 18.077   | 37911355     | 98.00  | 590957     |

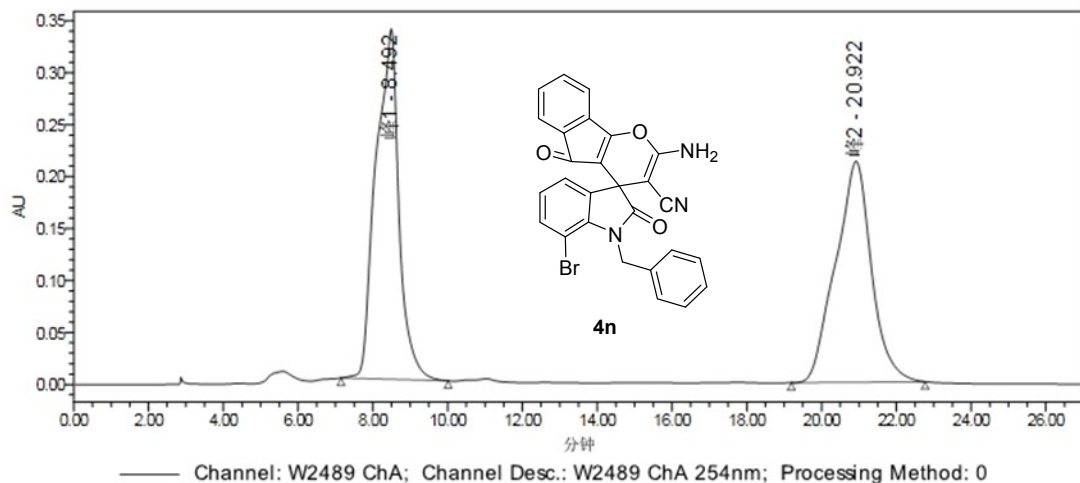

|   | Channel Description | Peak Name | RT (min) | Area (峰*sec) | % Area | Height (峰) |
|---|---------------------|-----------|----------|--------------|--------|------------|
| 1 | W2489 ChA 254nm     | 峰1        | 8.492    | 14465988     | 50.50  | 336970     |
| 2 | W2489 ChA 254nm     | 峰2        | 20.922   | 14180544     | 49.50  | 212529     |

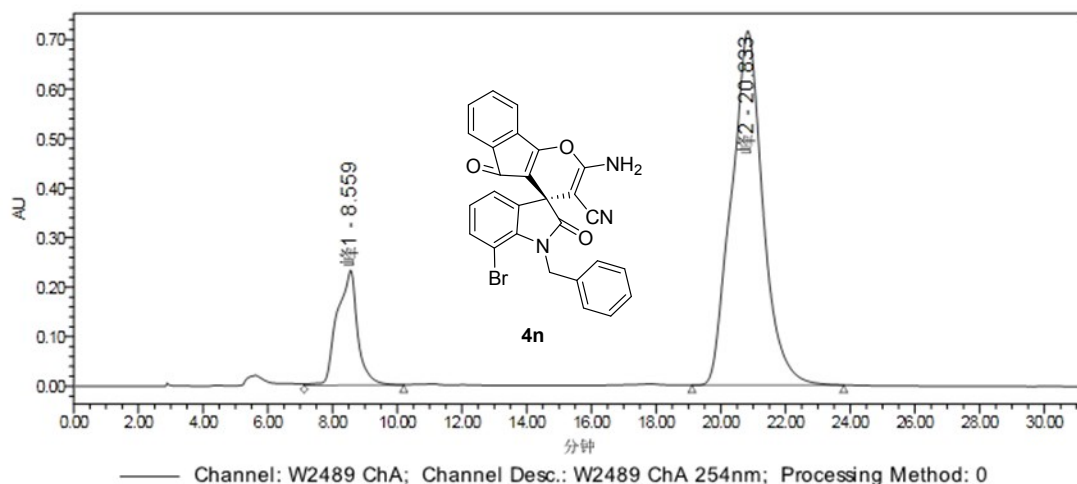

|   | Channel Description | Peak Name | RT (min) | Area (峰*sec) | % Area | Height (峰) |
|---|---------------------|-----------|----------|--------------|--------|------------|
| 1 | W2489 ChA 254nm     | 峰1        | 8.559    | 10194203     | 17.41  | 231710     |
| 2 | W2489 ChA 254nm     | 峰2        | 20.833   | 48355291     | 82.59  | 714843     |

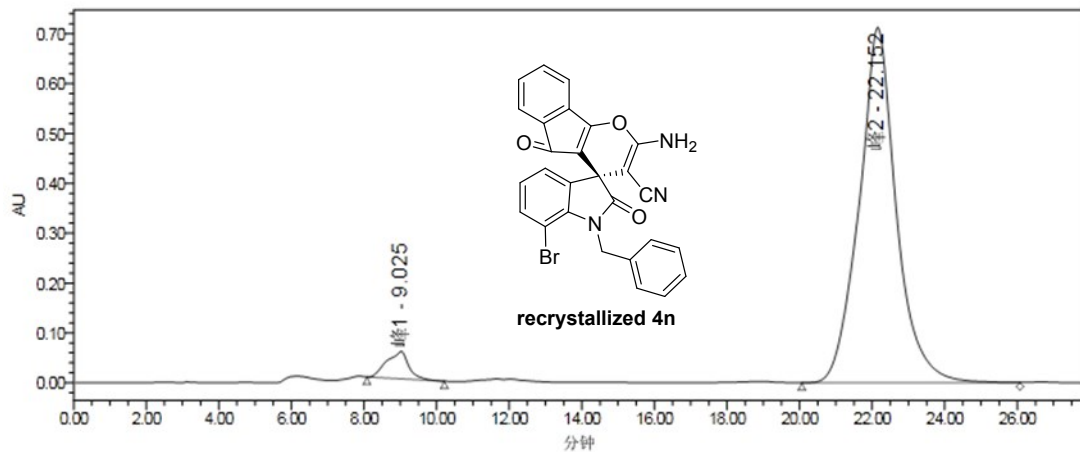

Channel: W2489 ChA; Channel Desc.: W2489 ChA 254nm; Processing Method: 0

|   | Channel Description | Peak Name | RT (min) | Area (峰*sec) | % Area | Height (峰) |
|---|---------------------|-----------|----------|--------------|--------|------------|
| 1 | W2489 ChA 254nm     | 峰1        | 9.025    | 2319126      | 4.37   | 54984      |
| 2 | W2489 ChA 254nm     | 峰2        | 22.152   | 50734084     | 95.63  | 712325     |

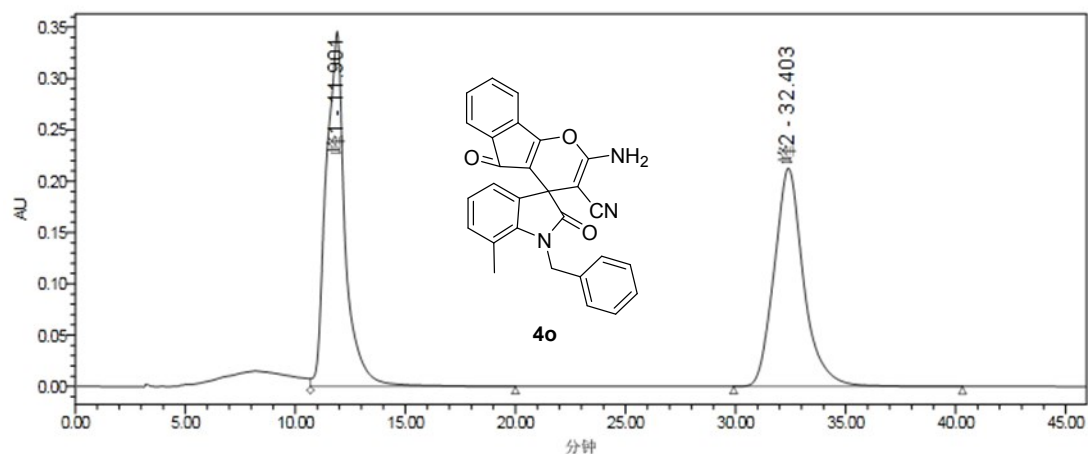

Channel: W2489 ChA; Channel Desc.: W2489 ChA 254nm; Processing Method: 0

|   | Channel Description | Peak Name | RT (min) | Area (峰*sec) | % Area | Height (峰) |
|---|---------------------|-----------|----------|--------------|--------|------------|
| 1 | W2489 ChA 254nm     | 峰1        | 11.901   | 20727602     | 51.19  | 345515     |
| 2 | W2489 ChA 254nm     | 峰2        | 32.403   | 19762246     | 48.81  | 212412     |

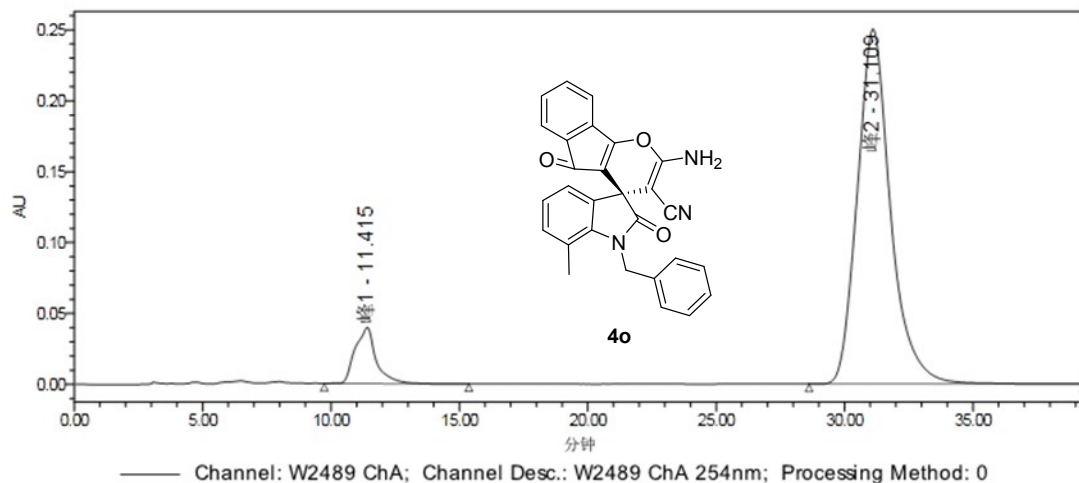

|   | Channel Description | Peak Name | RT (min) | Area (磷*sec) | % Area | Height (磷) |
|---|---------------------|-----------|----------|--------------|--------|------------|
| 1 | W2489 ChA 254nm     | 峰1        | 11.415   | 2252849      | 9.10   | 39597      |
| 2 | W2489 ChA 254nm     | 峰2        | 31.109   | 22496791     | 90.90  | 250258     |

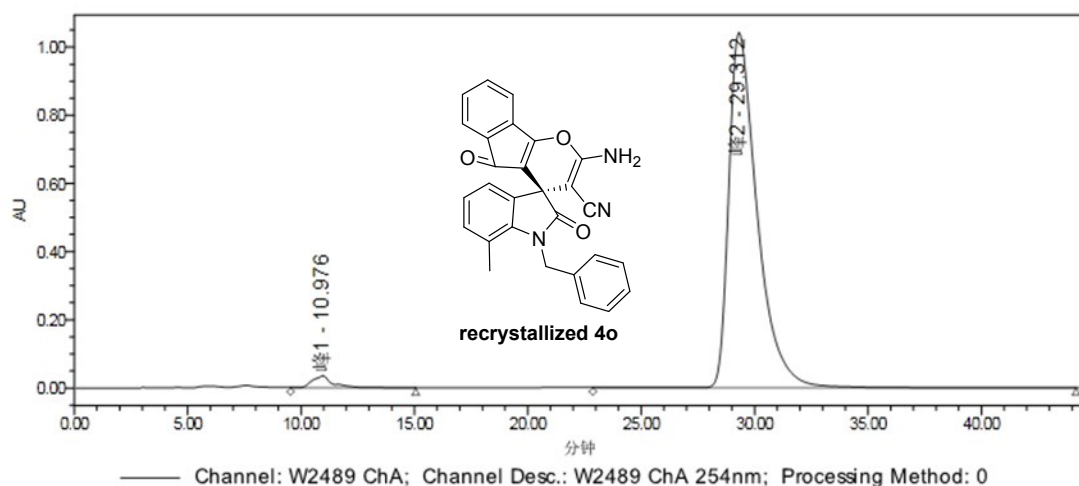

|   | Channel Description | Peak Name | RT (min) | Area (磷*sec) | % Area | Height (磷) |
|---|---------------------|-----------|----------|--------------|--------|------------|
| 1 | W2489 ChA 254nm     | 峰1        | 10.976   | 2166400      | 2.33   | 35167      |
| 2 | W2489 ChA 254nm     | 峰2        | 29.312   | 90915263     | 97.67  | 1041566    |

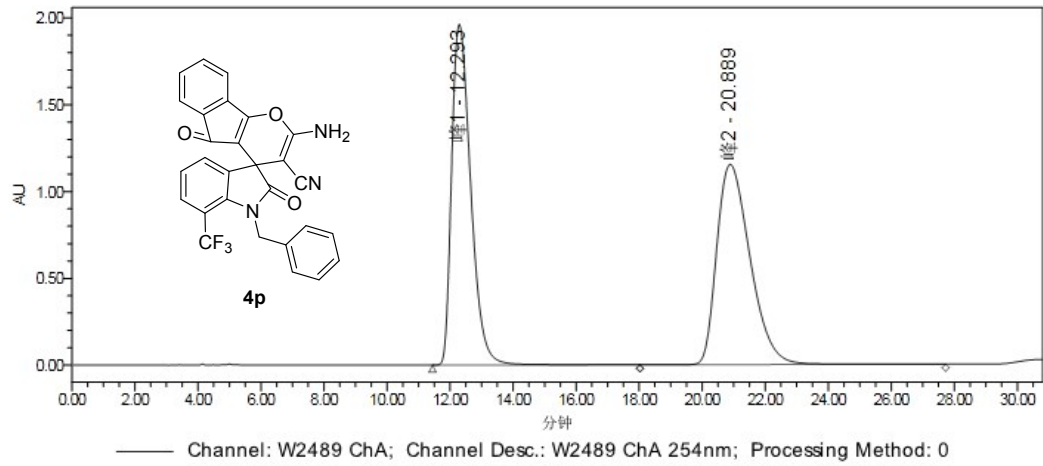

|   | Channel Description | Peak Name | RT (min) | Area (磷*sec) | % Area | Height (磷) |
|---|---------------------|-----------|----------|--------------|--------|------------|
| 1 | W2489 ChA 254nm     | 峰1        | 12.293   | 82408468     | 49.27  | 1961496    |
| 2 | W2489 ChA 254nm     | 峰2        | 20.889   | 84864490     | 50.73  | 1153026    |

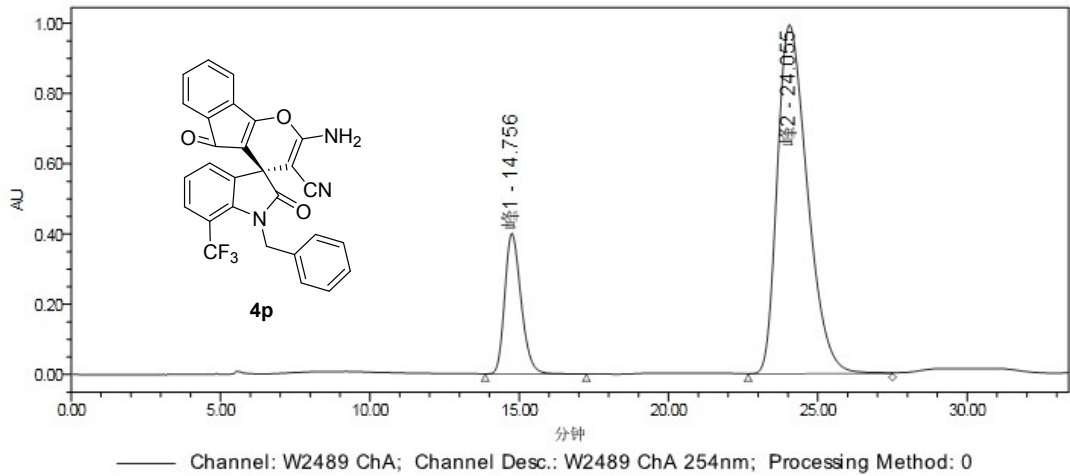

|   | Channel Description | Peak Name | RT (min) | Area (磷*sec) | % Area | Height (磷) |
|---|---------------------|-----------|----------|--------------|--------|------------|
| 1 | W2489 ChA 254nm     | 峰1        | 14.756   | 15247701     | 17.98  | 399593     |
| 2 | W2489 ChA 254nm     | 峰2        | 24.055   | 69562176     | 82.02  | 992423     |

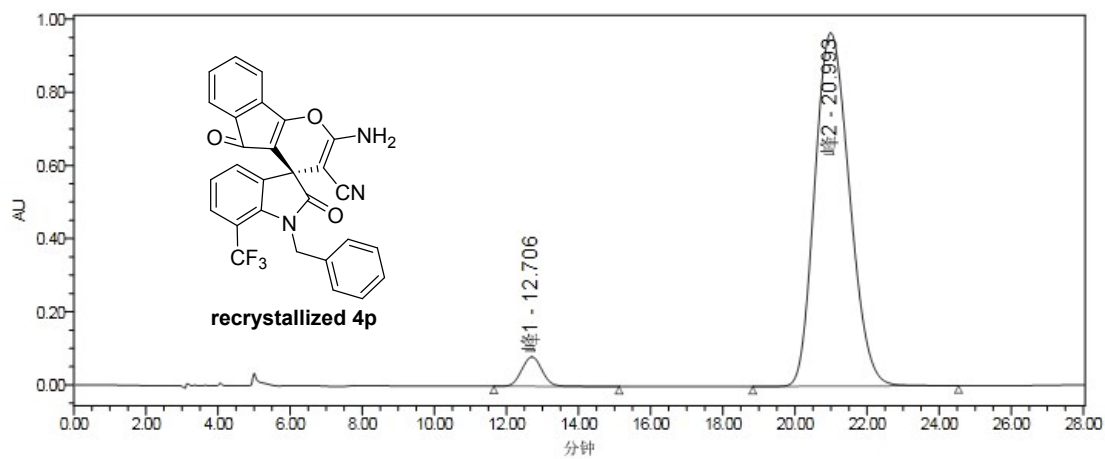

Channel: W2489 ChA; Channel Desc.: W2489 ChA 254nm; Processing Method: 0

|   | Channel Description | Peak Name | RT (min) | Area (磺*sec) | % Area | Height (磺) |
|---|---------------------|-----------|----------|--------------|--------|------------|
| 1 | W2489 ChA 254nm     | 峰1        | 12.706   | 3128710      | 4.63   | 80205      |
| 2 | W2489 ChA 254nm     | 峰2        | 20.993   | 64393356     | 95.37  | 965637     |

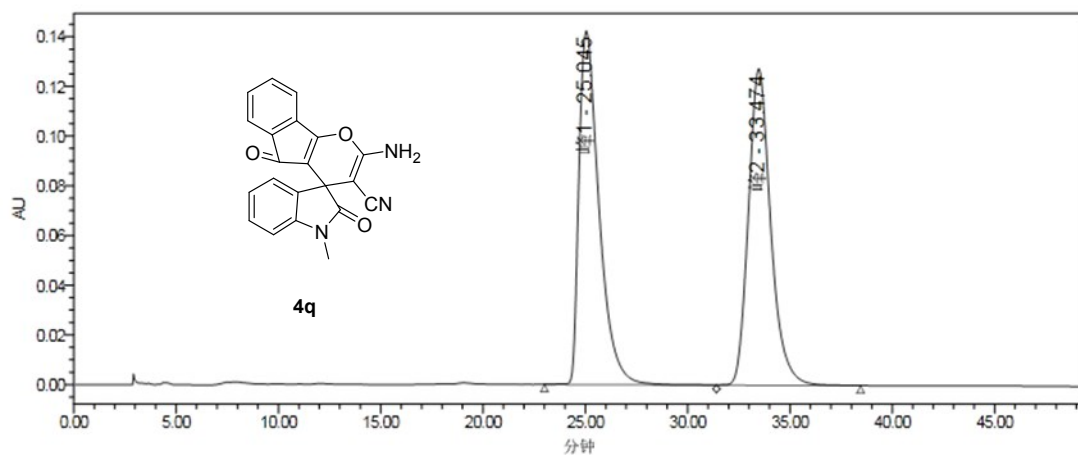

Channel: W2489 ChA; Channel Desc.: W2489 ChA 254nm; Processing Method: 0

|   | Channel Description | Peak Name | RT (min) | Area (磺*sec) | % Area | Height (磺) |
|---|---------------------|-----------|----------|--------------|--------|------------|
| 1 | W2489 ChA 254nm     | 峰1        | 25.045   | 9699741      | 50.15  | 142185     |
| 2 | W2489 ChA 254nm     | 峰2        | 33.474   | 9642030      | 49.85  | 127336     |



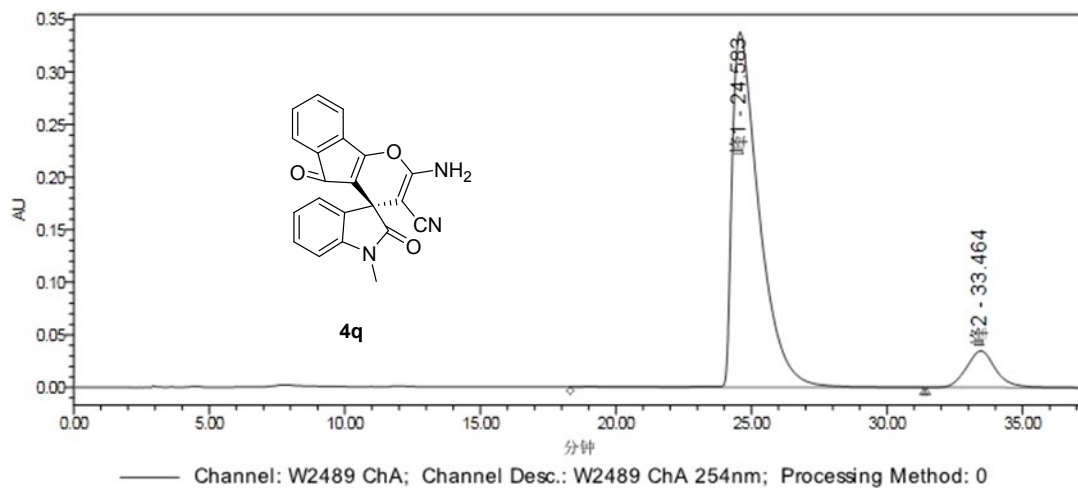

|   | Channel Description | Peak Name | RT (min) | Area (峰*sec) | % Area | Height (峰) |
|---|---------------------|-----------|----------|--------------|--------|------------|
| 1 | W2489 ChA 254nm     | 峰1        | 24.583   | 23304470     | 89.98  | 337436     |
| 2 | W2489 ChA 254nm     | 峰2        | 33.464   | 2595128      | 10.02  | 34835      |

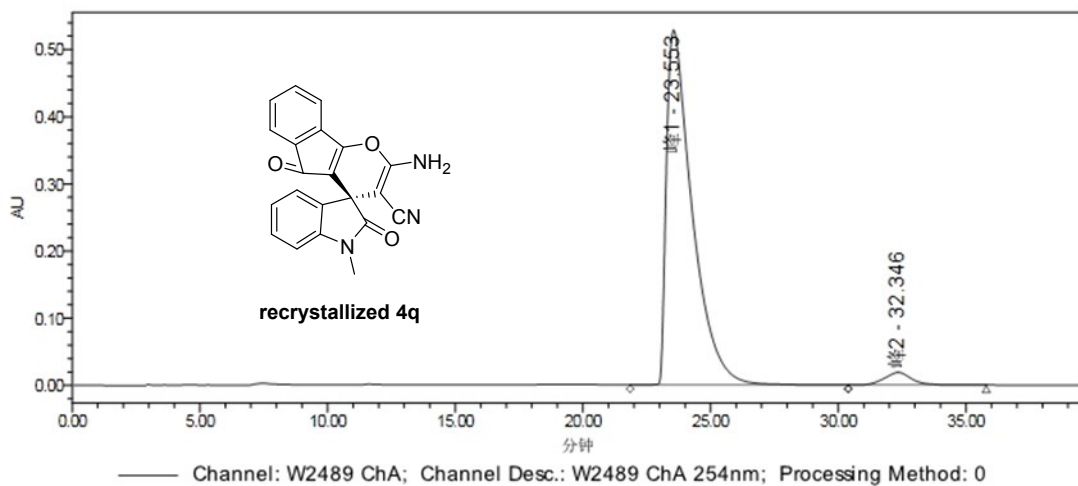

|   | Channel Description | Peak Name | RT (min) | Area (峰*sec) | % Area | Height (峰) |
|---|---------------------|-----------|----------|--------------|--------|------------|
| 1 | W2489 ChA 254nm     | 峰1        | 23.553   | 37058631     | 96.34  | 528286     |
| 2 | W2489 ChA 254nm     | 峰2        | 32.346   | 1406268      | 3.66   | 18802      |

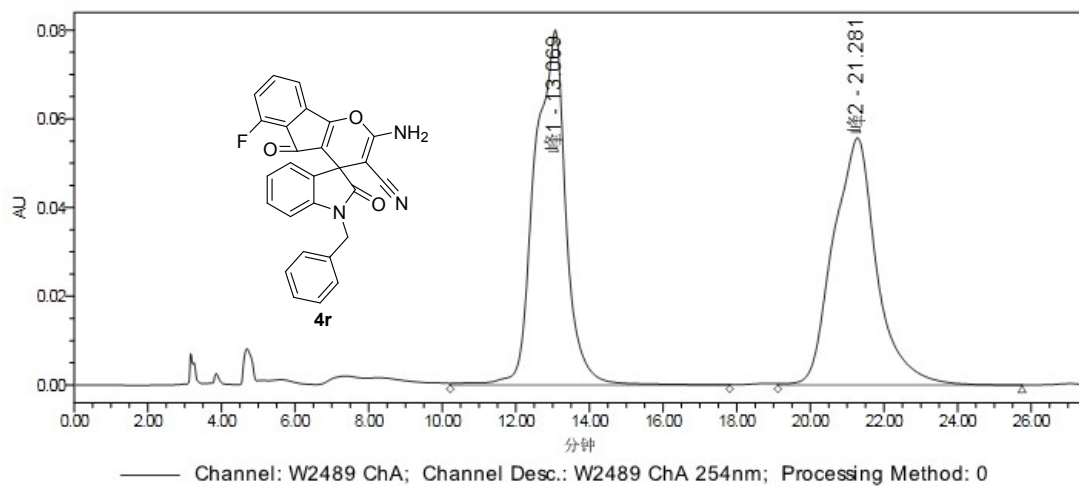

|   | Channel Description | Peak Name | RT (min) | Area (礦*sec) | % Area | Height (礦) |
|---|---------------------|-----------|----------|--------------|--------|------------|
| 1 | W2489 ChA 254nm     | 峰1        | 13.069   | 4728232      | 50.76  | 80010      |
| 2 | W2489 ChA 254nm     | 峰2        | 21.281   | 4586430      | 49.24  | 55690      |

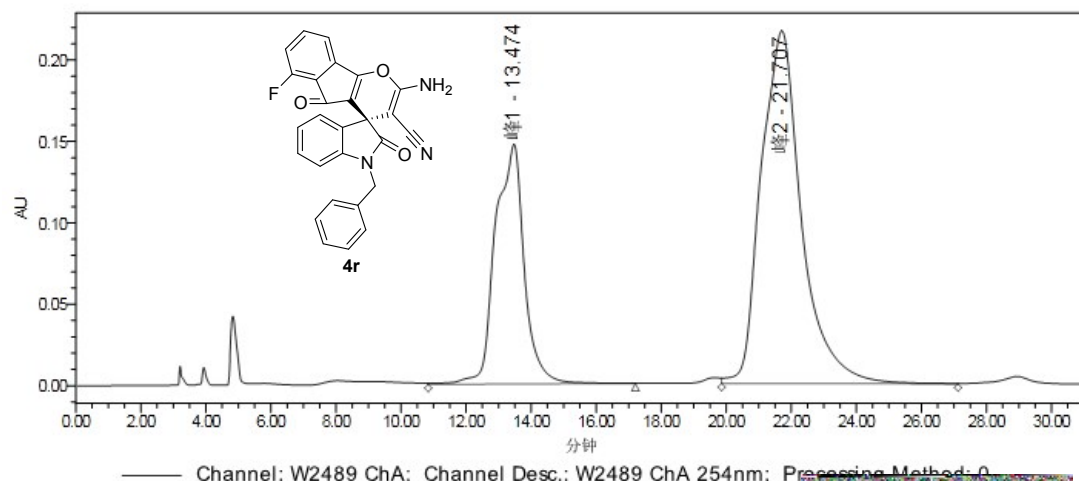

|   | Channel Description | Peak Name | RT (min) | Area (礦*sec) | % Area | Height (礦) |
|---|---------------------|-----------|----------|--------------|--------|------------|
| 1 | W2489 ChA 254nm     | 峰1        | 13.474   | 9121540      | 32.76  | 147233     |
| 2 | W2489 ChA 254nm     | 峰2        | 21.707   | 18722313     | 67.24  | 216631     |

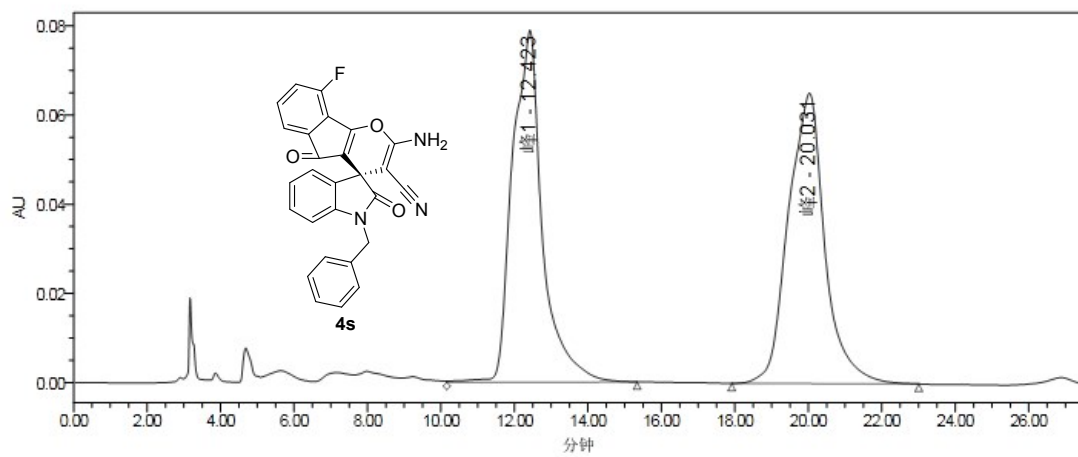

Channel: W2489 ChA; Channel Desc.: W2489 ChA 254nm; Processing Method: 0

| Peak | Channel Description | Peak Name | RT (min) | Area (面积*sec) | % Area | Height (峰) |
|------|---------------------|-----------|----------|---------------|--------|------------|
| 1    | W2489 ChA 254nm     | 峰1        | 12.423   | 4477410       | 49.99  | 78838      |
| 2    | W2489 ChA 254nm     | 峰2        | 20.031   | 4480025       | 50.01  | 65063      |

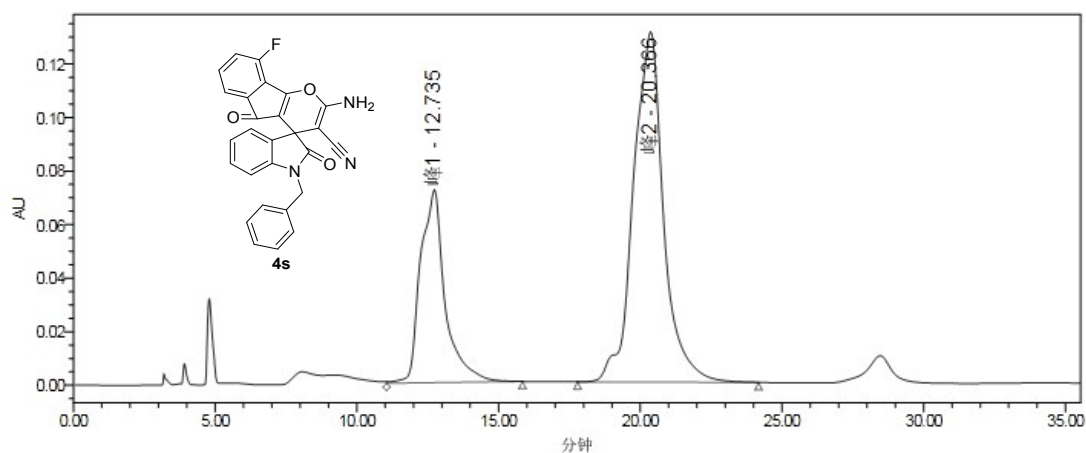

Channel: W2489 ChA; Channel Desc.: W2489 ChA 254nm; Processing Method: 0

| Peak | Channel Description | Peak Name | RT (min) | Area (面积*sec) | % Area | Height (峰) |
|------|---------------------|-----------|----------|---------------|--------|------------|
| 1    | W2489 ChA 254nm     | 峰1        | 12.735   | 4354420       | 31.00  | 71992      |
| 2    | W2489 ChA 254nm     | 峰2        | 20.366   | 9694094       | 69.00  | 130713     |

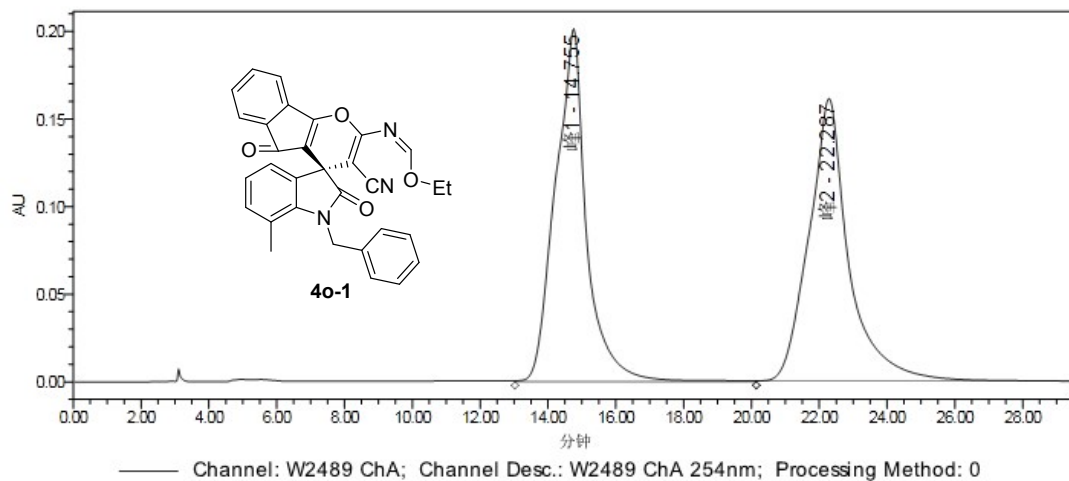

|   | Channel Description | Peak Name | RT (min) | Area (磷*sec) | % Area | Height (磷) |
|---|---------------------|-----------|----------|--------------|--------|------------|
| 1 | W2489 ChA 254nm     | 峰1        | 14.755   | 12801690     | 49.13  | 201177     |
| 2 | W2489 ChA 254nm     | 峰2        | 22.287   | 13257268     | 50.87  | 161414     |

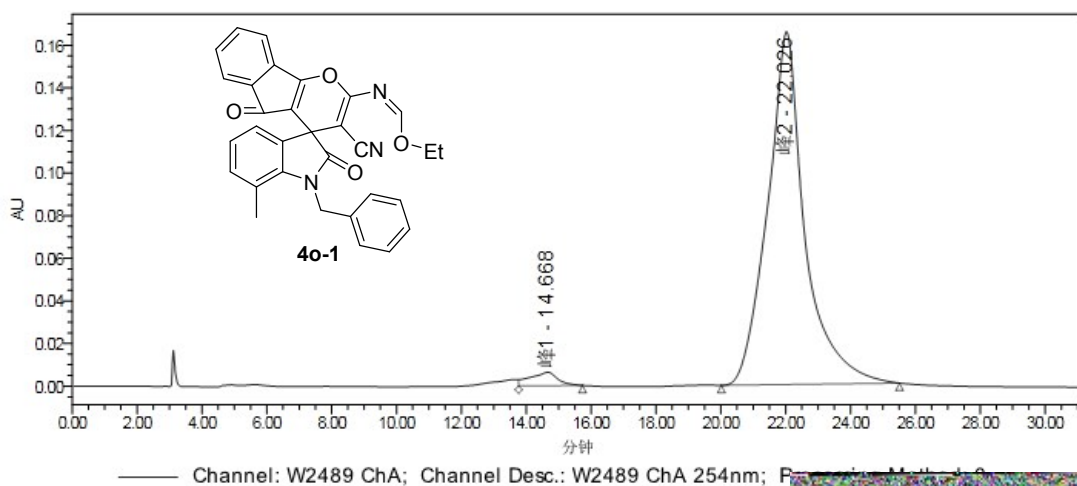

|   | Channel Description | Peak Name | RT (min) | Area (磷*sec) | % Area | Height (磷) |
|---|---------------------|-----------|----------|--------------|--------|------------|
| 1 | W2489 ChA 254nm     | 峰1        | 14.668   | 378332       | 2.79   | 6348       |
| 2 | W2489 ChA 254nm     | 峰2        | 22.026   | 13202188     | 97.21  | 165436     |

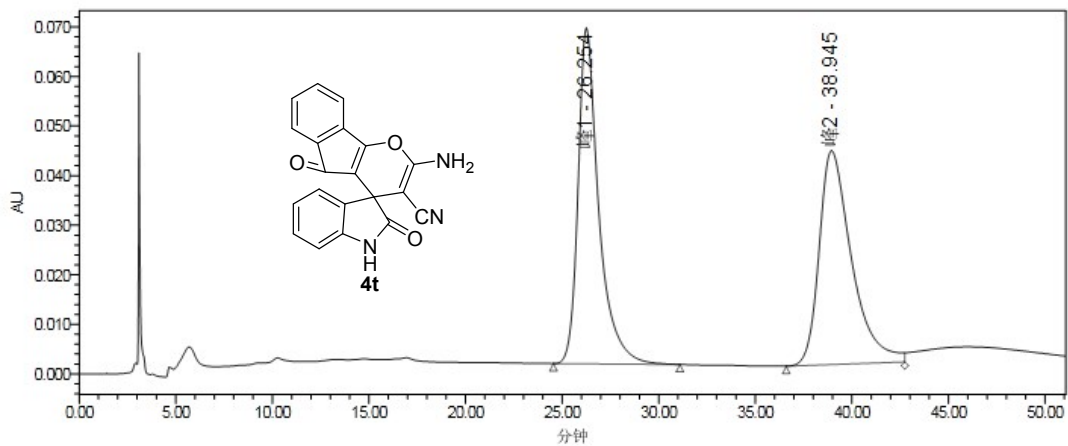

Channel: W2489 ChA; Channel Desc.: W2489 ChA 254nm; Processing Method: 0

|   | Channel Description | Peak Name | RT (min) | Area (AU*sec) | % Area | Height (AU) |
|---|---------------------|-----------|----------|---------------|--------|-------------|
| 1 | W2489 ChA 254nm     | 峰1        | 26.254   | 5043214       | 50.05  | 67751       |
| 2 | W2489 ChA 254nm     | 峰2        | 38.945   | 5034109       | 49.95  | 43147       |

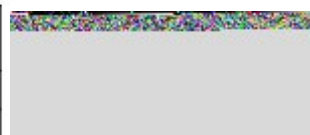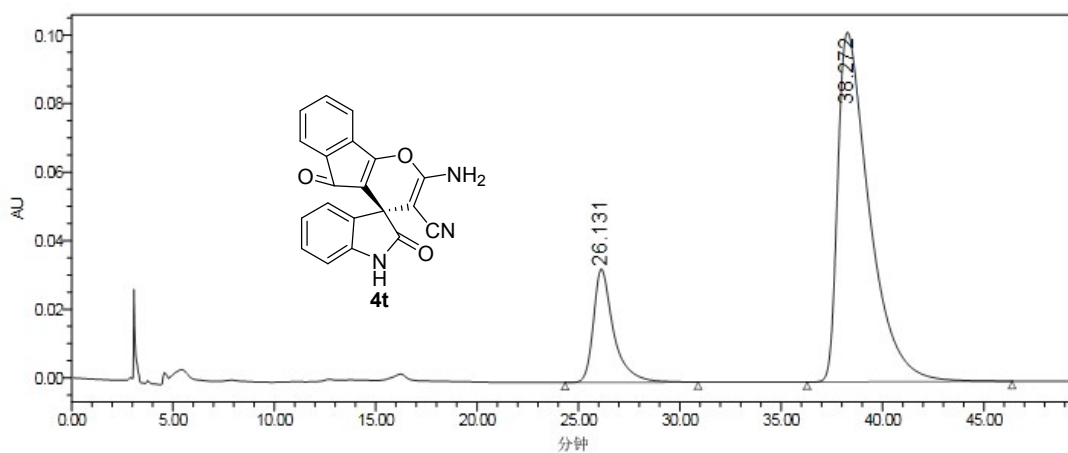

Channel: W2489 ChA; Channel Desc.: W2489 ChA 254nm; Processing Method: 0

|   | Channel Description | RT (min) | Area (AU*sec) | % Area | Height (AU) |
|---|---------------------|----------|---------------|--------|-------------|
| 1 | W2489 ChA 254nm     | 26.131   | 2283797       | 17.16  | 33013       |
| 2 | W2489 ChA 254nm     | 38.272   | 11022930      | 82.84  | 101924      |

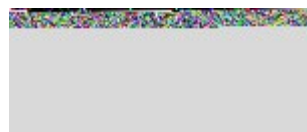

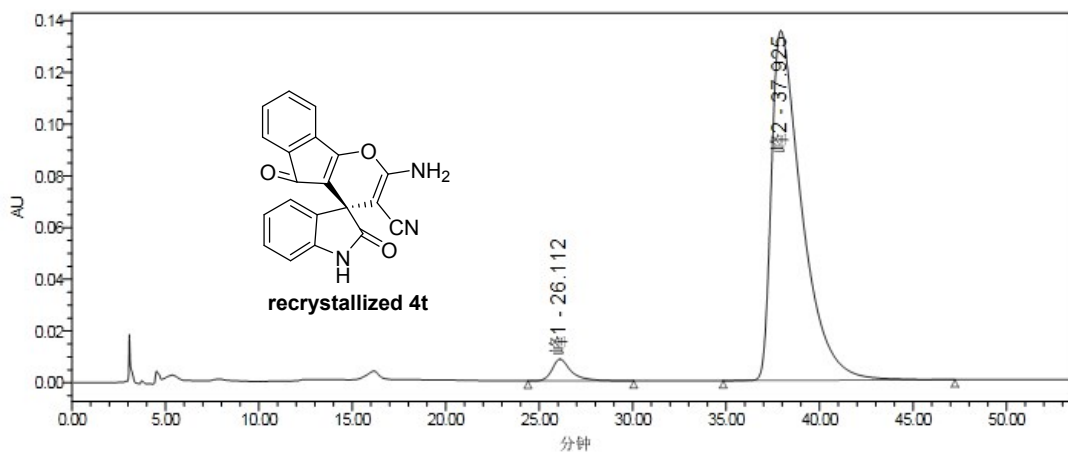

Channel: W2489 ChA; Channel Desc.: W2489 ChA 254nm; Processing Method: 0

|   | Channel Description | Peak Name | RT (min) | Area (磷*sec) | % Area | Height (磷) |
|---|---------------------|-----------|----------|--------------|--------|------------|
| 1 | W2489 ChA 254nm     | 峰1        | 26.112   | 597842       | 3.76   | 8423       |
| 2 | W2489 ChA 254nm     | 峰2        | 37.925   | 15282990     | 96.24  | 135273     |

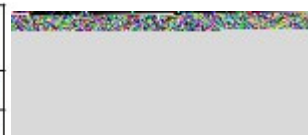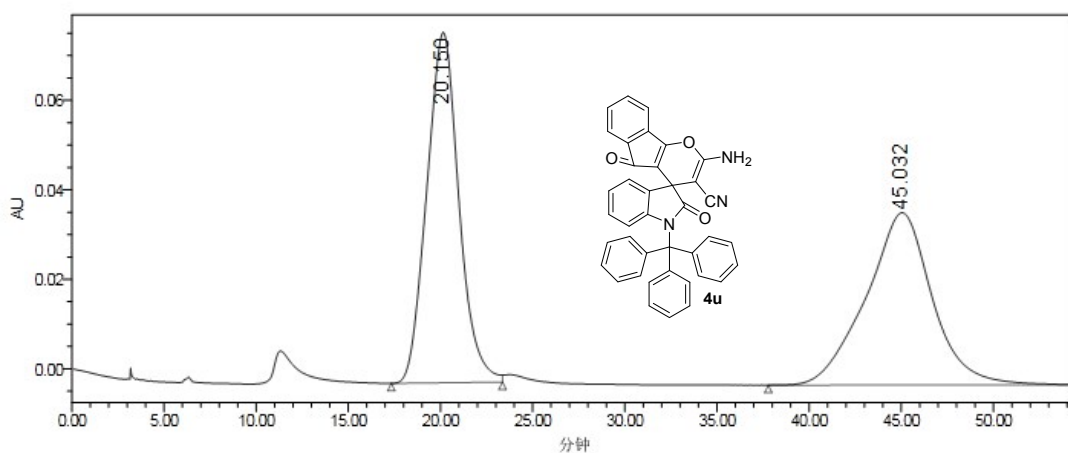

Channel: W2489 ChA; Channel Desc.: W2489 ChA 254nm; Processing Method: 0

|   | Channel Description | RT (min) | Area (磷*sec) | % Area | Height (磷) |
|---|---------------------|----------|--------------|--------|------------|
| 1 | W2489 ChA 254nm     | 20.150   | 9484595      | 49.71  | 78244      |
| 2 | W2489 ChA 254nm     | 45.032   | 9593380      | 50.29  | 38468      |

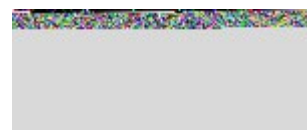

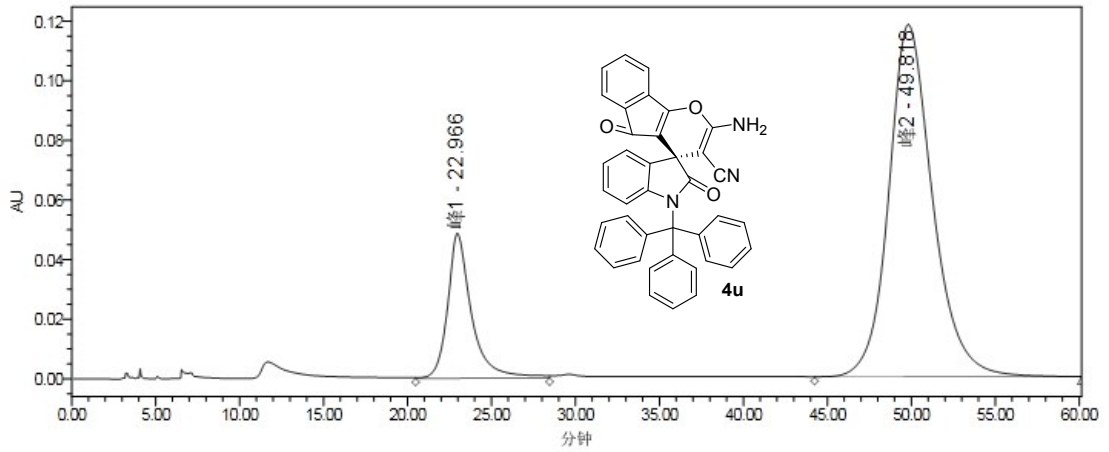

Channel: W2489 ChA; Channel Desc.: W2489 ChA 254nm; Processing Method: 0

|   | Channel Description | Peak Name | RT (min) | Area (磺*sec) | % Area | Height (磺) |
|---|---------------------|-----------|----------|--------------|--------|------------|
| 1 | W2489 ChA 254nm     | 峰1        | 22.966   | 4808650      | 18.23  | 48515      |
| 2 | W2489 ChA 254nm     | 峰2        | 49.818   | 21571741     | 81.77  | 118239     |

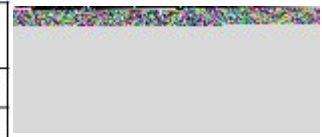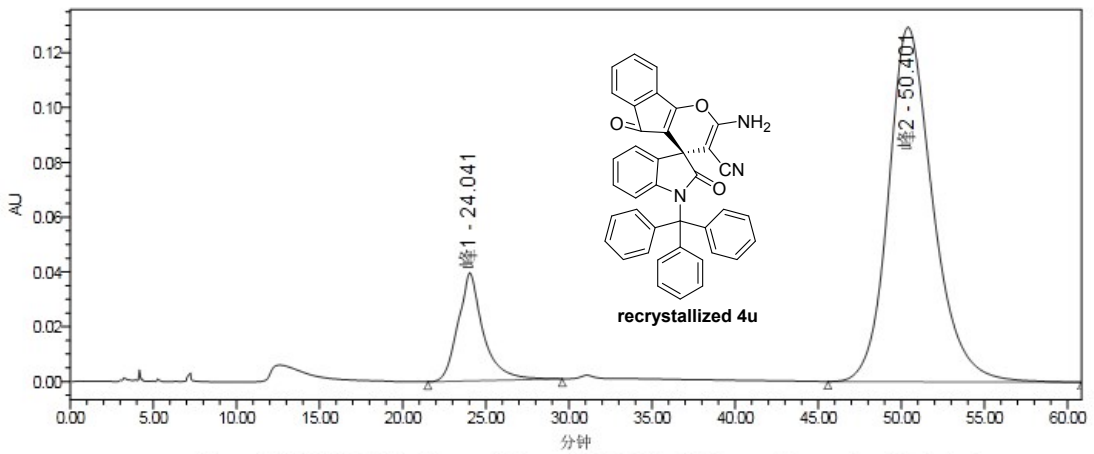

Channel: W2489 ChA; Channel Desc.: W2489 ChA 254nm; Processing Method: 0

|   | Channel Description | Peak Name | RT (min) | Area (磺*sec) | % Area | Height (磺) |
|---|---------------------|-----------|----------|--------------|--------|------------|
| 1 | W2489 ChA 254nm     | 峰1        | 24.041   | 4155979      | 14.71  | 39420      |
| 2 | W2489 ChA 254nm     | 峰2        | 50.401   | 24089363     | 85.29  | 129400     |

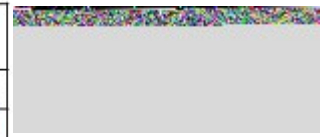

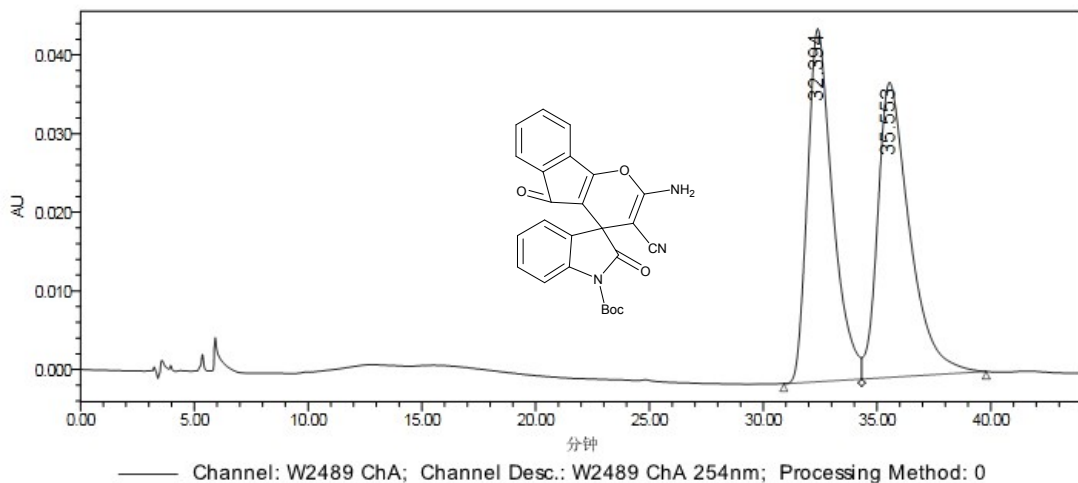

|   | Channel Description | RT (min) | Area (磺*sec) | % Area | Height (磺) |
|---|---------------------|----------|--------------|--------|------------|
| 1 | W2489 ChA 254nm     | 32.394   | 3452806      | 48.56  | 44848      |
| 2 | W2489 ChA 254nm     | 35.553   | 3657250      | 51.44  | 37470      |

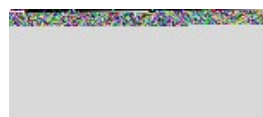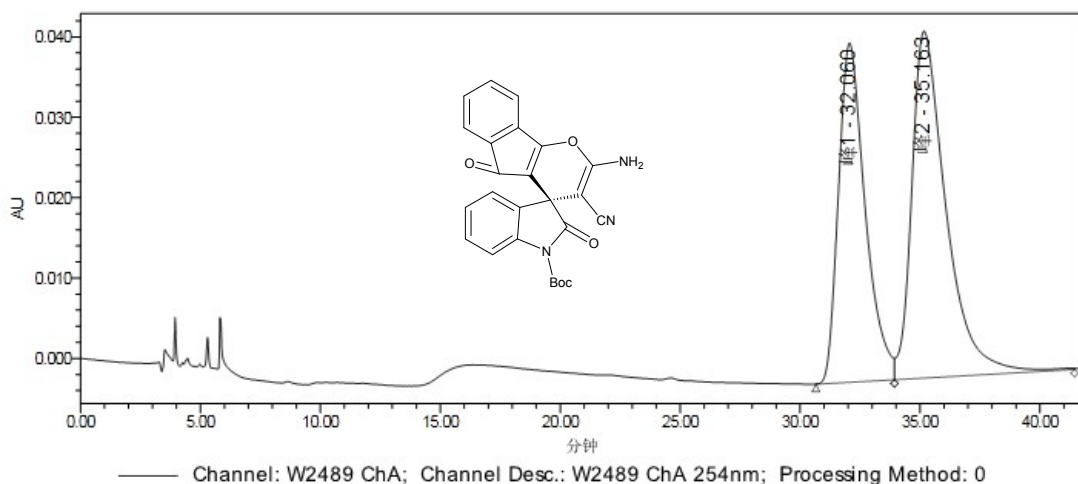

|   | Channel Description | Peak Name | RT (min) | Area (磺*sec) | % Area | Height (磺) |
|---|---------------------|-----------|----------|--------------|--------|------------|
| 1 | W2489 ChA 254nm     | 峰1        | 32.060   | 3259838      | 43.16  | 42158      |
| 2 | W2489 ChA 254nm     | 峰2        | 35.163   | 4292925      | 56.84  | 43132      |

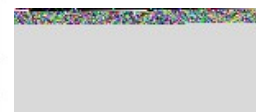

Supplement: d0nj06092e1.pdf [file d0nj06092e1.pdf]
